# Supplementary material
Source: MDPI journal article supplement (https://www.mdpi.com/2073-4344/8/4/137)
Supplement: s1 [file s1]

Article

# The first Catalytic Direct C-H arylation on C2 and C3 of thiophene ring applied to thieno-pyridines, -pyrimidines and –pyrazines

Joana F. Campos <sup>1,2</sup>, Maria-João R. P. Queiroz <sup>2</sup> and Sabine Berteina-Raboin <sup>1,\*</sup>

<sup>1</sup> Institut de Chimie Organique et Analytique (ICOA), Université d'Orléans UMR-CNRS 7311, BP 6759, rue de Chartres 45067 Orléans cedex 2, France

<sup>2</sup> Departamento/Centro de Química, Escola de Ciências, Universidade do Minho, Campus de Gualtar, 4710-057 Braga, Portugal

\* Correspondence: sabine.berteina-raboin@univ-orleans.fr; Tel.: +33-238-494-856

Received: date; Accepted: date; Published: date

## Experimental Section

|                                                                                              |      |
|----------------------------------------------------------------------------------------------|------|
| 1. Materials and Methods                                                                     | 2    |
| 1.1. General Methods                                                                         | 2    |
| 1.2. General procedure for synthesis of all Products                                         | 2-8  |
| 1.3. <sup>1</sup> H NMR, <sup>13</sup> C NMR and <sup>19</sup> F NMR Spectra of all Products | 9-35 |
| 1.4. References                                                                              | 36   |

## 1. Materials and Methods

### 1.1. General Methods

All reagents were purchased from commercial suppliers and were used without further purification. THF was dried with a dry station GT S100 instantaneously prior to use. The reactions were monitored by thin-layer chromatography (TLC) analysis using silica gel (60 F254) plates. Compounds were visualized by UV irradiation. Flash column chromatography was performed on silica gel 60 (230 - 400 mesh, 0.040 - 0.063 mm). Melting points (mp [°C]) were taken on samples in open capillary tubes and are uncorrected. The infrared spectra of compounds were recorded on a Thermo Scientific Nicolet iS10. <sup>1</sup>H and <sup>13</sup>C NMR spectra were recorded on a Bruker avance II spectrometer at 250 MHz (<sup>13</sup>C, 62.9 MHz) and on a Bruker avance III HD nanobay 400 MHz (<sup>13</sup>C 100.62 MHz). Chemical shifts are given in parts per million from tetramethylsilane (TMS) or deterred solvent (MeOH-*d*<sub>4</sub>, Chloroform-*d*) as internal standard. The following abbreviations are used for the proton spectra multiplicities: b : broad, s: singlet, d: doublet, t: triplet, q: quartet, p: pentuplet, m: multiplet. Coupling constants (*J*) are reported in Hertz (Hz). High-resolution mass spectra (HRMS (ESI)) were performed on a Maxis Bruker 4G by the "Federation de Recherche" ICOA/CBM (FR2708) platform.

### 1.2. General procedure for synthesis of thieno[3,2-*d*]pyrimidin-4-amines (7-13)

A solution of 4-chlorothieno[3,2-*d*]pyrimidine (**6**) (100 mg; 0.586 mmol) and amine derivative (1.172 mmol) was heated at 100 °C in dry toluene, for 20-30min. The reaction was followed by TLC. After completion, the mixture was concentrated under vacuum. The solid obtained was purified by column chromatography. The solvent polarity was increased via a gradient from neat petroleum ether to a mixture of AcOEt/petroleum ether.

#### 4-(thieno[3,2-*d*]pyrimidin-4-yl)morpholine (**7**) [30]

From compound **6** (100 mg; 0.586 mmol), morpholine (102 mg; 1.172 mmol) and after purification by column chromatography using a solvent gradient from neat petroleum ether to 50% AcOEt/petroleum ether, compound **7** was obtained as a white solid (111 mg, 86%), m.p. 141 – 143 °C. <sup>1</sup>H NMR (400 MHz, CDCl<sub>3</sub>) δ 3.78 – 3.82 (m, 4H), 3.91 – 3.97 (m, 4H), 7.39 (d, *J* = 5.6 Hz, 1H), 7.69 (d, *J* = 5.6 Hz, 1H), 8.56 (s, 1H) ppm. <sup>13</sup>C NMR (100.6 MHz, CDCl<sub>3</sub>) δ 46.3 (2xCH), 66.7 (2xCH), 114.4 (C), 125.3 (CH), 131.5 (CH), 154.2 (CH), 158.2 (C), 161.6 (C) ppm.

#### *N,N*-dibutylthieno[3,2-*d*]pyrimidin-4-amine (**8**)

From compound **6** (100 mg; 0.586 mmol), di-*n*-butylamine (152 mg; 1.172 mmol) and after purification by column chromatography using a solvent gradient from neat petroleum ether to 40% AcOEt/petroleum ether, compound **8** was obtained as a white solid (148 mg, 96%), m.p. 121 – 123 °C. <sup>1</sup>H NMR (400 MHz, CDCl<sub>3</sub>) δ 0.92 (t, *J* = 7.4 Hz, 6H), 1.32 – 1.40 (m, 4H), 1.64 (dd, *J* = 6.6, 16.9 Hz, 4H), 3.63 – 3.68 (m, 4H), 7.31 (d, *J* = 5.6 Hz, 1H), 7.62 (d, *J* = 5.6 Hz, 1H), 8.45 (s, 1H) ppm. <sup>13</sup>C NMR (100.6 MHz, CDCl<sub>3</sub>) δ 13.9 (2xCH), 20.1 (2xCH), 30.8 (2xCH), 49.3 (2xCH), 113.3 (C), 124.9 (CH), 130.9 (CH), 154.3 (CH), 157.5 (C), 160.6 (C) ppm. HRMS: calcd. for C<sub>14</sub>H<sub>22</sub>N<sub>3</sub>S [M+H]<sup>+</sup> 264.1529, found 264.1532.

#### 4-(piperidin-1-yl)thieno[3,2-*d*]pyrimidine (**9**)

From compound **6** (100 mg; 0.586 mmol), piperidine (100 mg; 1.172 mmol) and after purification by column chromatography using a solvent gradient from neat petroleum ether to 40% AcOEt/petroleum ether, compound **9** was obtained as a white solid (105 mg, 82%), m.p. 154 – 156 °C. <sup>1</sup>H NMR (400 MHz, CDCl<sub>3</sub>) δ 1.10 – 1.61 (m, 6H), 3.87 – 3.90 (m, 4H), 7.33 (d, *J* = 5.6 Hz, 1H), 7.62 (d, *J* = 5.6 Hz, 1H), 8.49 (s, 1H) ppm. <sup>13</sup>C NMR (100.6 MHz, CDCl<sub>3</sub>) δ 24.7 (CH), 26.1 (2xCH), 47.4 (2xCH),

114.2 (C), 125.1 (CH), 131.1 (CH), 154.2 (CH), 157.8 (C), 161.0 (C) ppm. CAS: 679394-37-7; SIA Enamine.

#### N-(2-(trifluoromethyl)phenyl)thieno[3,2-d]pyrimidin-4-amine (10)

From compound **6** (100 mg; 0.586 mmol), 2-trifluoromethylaniline (189 mg; 1.172 mmol) and after purification by column chromatography using a solvent gradient from neat petroleum ether to 40% AcOEt/petroleum ether, compound **10** was obtained as a white solid (104 mg, 60%), m.p. 122 – 124 °C. <sup>1</sup>H NMR (400 MHz, CDCl<sub>3</sub>) δ 7.37 (t, *J* = 7.7 Hz, 1H), 7.45 (d, *J* = 5.4 Hz, 1H), 7.62 (t, *J* = 7.8 Hz, 1H), 7.70 – 7.76 (m, 2H), 7.99 (d, *J* = 8.1 Hz, 1H), 8.70 (s, 1H) ppm. <sup>13</sup>C NMR (100.6 MHz, CDCl<sub>3</sub>) δ 122.5 (C), 124.2 (C), 124.5 (C), 125.1 (CH), 126.0 (CH), 126.7 (CH), 127.8 (CH), 132.6 (CH), 132.9 (CH), 135.3 (C), 154.5 (CH), 155.9 (C), 161.5 (C) ppm. <sup>19</sup>F NMR (376 MHz, CDCl<sub>3</sub>) δ -60.8 ppm. HRMS: calcd. for C<sub>13</sub>H<sub>9</sub>F<sub>3</sub>N<sub>3</sub>S [M+H]<sup>+</sup> 296.0464, found 296.0467.

#### N-(4-methoxyphenyl)thieno[3,2-d]pyrimidin-4-amine (11) [31]

From compound **6** (100 mg; 0.586 mmol), 4-methoxyaniline (144 mg; 1.172 mmol) and after purification by column chromatography using a solvent gradient from neat petroleum ether to 45% AcOEt/petroleum ether, compound **11** was obtained as a white solid (130 mg, 86%), m.p. 154–156 °C. <sup>1</sup>H NMR (400 MHz, CDCl<sub>3</sub>) δ 3.85 (s, 3H), 6.92 – 6.96 (m, 2H), 7.36 (d, *J* = 5.4 Hz, 1H), 7.38 – 7.42 (m, 2H), 7.64 (d, *J* = 5.4 Hz, 1H), 7.93 (s, 1H), 8.60 (s, 1H) ppm. <sup>13</sup>C NMR (100.6 MHz, CDCl<sub>3</sub>) δ 55.5 (CH), 114.3 (2xCH), 114.4 (C), 124.6 (2xCH), 128.2 (CH), 129.7 (C), 133.2 (CH), 154.6 (CH), 157.3 (C), 158.6 (C), 161.2 (C) ppm.

#### methyl 4-(thieno[3,2-d]pyrimidin-4-ylamino)benzoate (12)

From compound **6** (100 mg; 0.586 mmol), methyl-4-aminobenzoate (177 mg; 1.172 mmol) and after purification by column chromatography using a solvent gradient from neat petroleum ether to 45% AcOEt/petroleum ether, compound **12** was obtained as a white solid (111 mg, 67%), m.p. 227 – 229 °C. <sup>1</sup>H NMR (400 MHz, CDCl<sub>3</sub>) δ 3.93 (s, 3H), 6.97 (d, *J* = 19.8 Hz, 1H), 7.51 (d, *J* = 5.4 Hz, 1H), 7.79 – 7.84 (m, 3H), 8.09 (d, *J* = 8.7 Hz, 2H), 8.82 (s, 1H) ppm. <sup>13</sup>C NMR (100.6 MHz, CDCl<sub>3</sub>) δ 29.7 (C), 52.1 (CH), 116.2 (C), 120.5 (2xCH), 125.6 (CH), 130.9 (2xCH), 132.1 (CH), 142.4 (C), 154.6 (CH), 154.9 (C), 161.2 (C), 166.6 (C) ppm. HRMS: calcd. for C<sub>14</sub>H<sub>12</sub>N<sub>3</sub>O<sub>2</sub>S [M+H]<sup>+</sup> 286.0645, found 286.0646.

#### N-((3s,5s,7s)-adamantan-1-yl)thieno[3,2-d]pyrimidin-4-amine (13)

From compound **6** (100 mg; 0.586 mmol), adamantylamine (177 mg; 1.172 mmol) and after purification by column chromatography using a solvent gradient from neat petroleum ether to 50% AcOEt/petroleum ether, compound **13** was obtained as a white solid (114 mg, 68%), m.p. 238 – 240 °C. <sup>1</sup>H NMR (400 MHz, CDCl<sub>3</sub>) δ 1.70 – 1.77 (m, 6H), 2.14 (s, 3H), 2.24 (d, *J* = 2.6 Hz, 6H), 4.52 (s, 1H), 7.36 (d, *J* = 5.4 Hz, 1H), 7.61 (d, *J* = 5.4 Hz, 1H), 8.57 (s, 1H) ppm. <sup>13</sup>C NMR (100.6 MHz, CDCl<sub>3</sub>) δ 29.6 (3xCH), 36.4 (3xCH), 41.9 (3xCH), 53.6 (C), 115.6 (C), 125.6 (CH), 129.7 (CH), 154.6 (CH), 156.9 (C), 159.5 (C) ppm. HRMS: calcd. for C<sub>16</sub>H<sub>20</sub>N<sub>3</sub>S [M+H]<sup>+</sup> 286.1372, found 286.1375.

#### General procedure for synthesis of 14-23 from 6 (one pot 2 steps “C-2” CH activation)

A solution of 4-chlorothieno[3,2-d]pyrimidine (**6**) (100 mg; 0.586 mmol) and morpholine (1.172 mmol) was heated at 100 °C in dry toluene, for 20 min. Then, Pd(OAc)<sub>2</sub> (0.059 mmol), TTBP-HBF<sub>4</sub> (0.117 mmol), K<sub>2</sub>CO<sub>3</sub> (1.172 mmol) and bromo derivative (1.172 mmol) were added. The reaction mixture was stirred at same temperature for 46h. The reaction was followed by TLC. After completion, the mixture was concentrated under vacuum. The solid obtained was purified by column chromatography. The solvent polarity was increased via a gradient from neat petroleum ether to a mixture of AcOEt/petroleum ether.

**120 4-(6-phenylthieno[3,2-d]pyrimidin-4-yl)morpholine (14)**

121 From compound **6** (100 mg; 0.586 mmol), morpholine (102 mg; 1.172 mmol) followed by  
122 Pd(OAc)<sub>2</sub> (13 mg; 0.059 mmol), TTBP · HBF<sub>4</sub> (34 mg; 0.117 mmol), K<sub>2</sub>CO<sub>3</sub> (162 mg; 1.172 mmol),  
123 bromobenzene (184 mg; 1.172 mmol) and after purification by column chromatography using a  
124 solvent gradient from neat petroleum ether to 27% AcOEt/petroleum ether, compound **14** was  
125 obtained as a yellow solid (122 mg, 70%), m.p. 149 – 151 °C. <sup>1</sup>H NMR (400 MHz, Chloroform-d) δ 3.86  
126 – 3.89 (m, 4H), 3.99 – 4.03 (m, 4H), 7.41 – 7.49 (m, 3H), 7.61 (s, 1H), 7.71 – 7.76 (m, 2H), 8.59 (s, 1H)  
127 ppm. <sup>13</sup>C NMR (100.6 MHz, CDCl<sub>3</sub>) δ 46.4 (2xCH), 66.8 (2xCH), 114.2 (C), 120.5 (CH), 126.6 (2xCH),  
128 129.2 (2xCH), 129.6 (CH), 132.8 (C), 149.5 (C), 154.5 (CH), 157.9 (C), 162.3 (C) ppm. HRMS: calcd. for  
129 C<sub>16</sub>H<sub>16</sub>N<sub>3</sub>OS [M+H]<sup>+</sup> 298.1009, found 298.1008.

**130 4-(6-(p-tolyl)thieno[3,2-d]pyrimidin-4-yl)morpholine (16)**

131 From compound **6** (100 mg; 0.586 mmol), morpholine (102 mg; 1.172 mmol) followed by  
132 Pd(OAc)<sub>2</sub> (13 mg; 0.059 mmol), TTBP · HBF<sub>4</sub> (34 mg; 0.117 mmol), K<sub>2</sub>CO<sub>3</sub> (162 mg; 1.172 mmol), 4-  
133 bromotoluene (200 mg; 1.172 mmol) and after purification by column chromatography using a  
134 solvent gradient from neat petroleum ether to 40% AcOEt/petroleum ether, compound **17** was  
135 obtained as a white solid (106 mg, 58%), m.p. 144 – 146 °C. <sup>1</sup>H NMR (400 MHz, CDCl<sub>3</sub>) δ 8.28 (s, 1H),  
136 7.32 (d, *J* = 8.2 Hz, 2H), 6.98 – 6.93 (m, 3H), 3.71 – 3.69 (m, 4H), 3.58 – 3.55 (m, 4H), 2.11 (s, 3H) ppm.  
137 <sup>13</sup>C NMR (100.6 MHz, CDCl<sub>3</sub>) δ 162.4 (C), 157.9 (C), 154.5 (CH), 149.7 (C), 139.9 (C), 129.9 (2xCH),  
138 126.5 (2xCH), 119.9 (CH), 113.9 (C), 100.0 (C), 66.8 (2xCH), 46.4 (2xCH), 21.4 (CH) ppm. HRMS: calcd.  
139 for C<sub>17</sub>H<sub>18</sub>N<sub>3</sub>OS [M+H]<sup>+</sup> 312.1165, found 312.1165.

**140 4-(6-(3,4,5-trimethoxyphenyl)thieno[3,2-d]pyrimidin-4-yl)morpholine (17)**

141 From compound **6** (100 mg; 0.586 mmol), morpholine (102 mg; 1.172 mmol) followed by  
142 Pd(OAc)<sub>2</sub> (13 mg; 0.059 mmol), TTBP · HBF<sub>4</sub> (34 mg; 0.117 mmol), K<sub>2</sub>CO<sub>3</sub> (162 mg; 1.172 mmol), 5-  
143 bromo-1,2,3-trimethoxybenzene (290 mg; 1.172 mmol) and after purification by column  
144 chromatography using a solvent gradient from neat petroleum ether to 35% AcOEt/petroleum ether,  
145 compound **18** was obtained as a white solid (143 mg, 63%), m.p. 191 – 193 °C. <sup>1</sup>H NMR (400 MHz,  
146 CDCl<sub>3</sub>) δ 3.86 – 3.89 (m, 4H), 3.90 (s, 3H), 3.95 (s, 6H), 3.99 – 4.02 (m, 4H), 6.91 (s, 2H), 7.53 (s, 1H), 8.59  
147 (s, 1H) ppm. <sup>13</sup>C NMR (100.6 MHz, CDCl<sub>3</sub>) δ 46.4 (2xCH), 56.3 (2xCH), 61.0 (CH), 66.8 (2xCH), 104.1  
148 (2xCH), 114.0 (C), 120.4 (CH), 128.4 (C), 139.6 (C), 149.5 (C), 153.7 (2xC), 154.5 (CH), 157.8 (C), 162.3  
149 (C) ppm. HRMS: calcd for C<sub>19</sub>H<sub>22</sub>N<sub>3</sub>O<sub>4</sub>S [M+H]<sup>+</sup> 388.1326, found 388.1327.

**150 methyl 4-(4-morpholinothieno[3,2-d]pyrimidin-6-yl)benzoate (18)**

151 From compound **6** (100 mg; 0.586 mmol), morpholine (102 mg; 1.172 mmol) followed by  
152 Pd(OAc)<sub>2</sub> (13 mg; 0.059 mmol), TTBP · HBF<sub>4</sub> (34 mg; 0.117 mmol), K<sub>2</sub>CO<sub>3</sub> (162 mg; 1.172 mmol), methyl  
153 4-bromobenzoate (252 mg; 1.172 mmol) and after purification by column chromatography using a  
154 solvent gradient from neat petroleum ether to 40% AcOEt/petroleum ether, compound **19** was  
155 obtained as a yellow solid (127 mg, 61%), m.p. 195 – 197 °C. <sup>1</sup>H NMR (400 MHz, CDCl<sub>3</sub>) δ 3.87 (dd, *J*  
156 = 4.8, 3.1 Hz, 4H), 3.96 (s, 3H), 4.00 – 4.03 (m, 4H), 7.70 (s, 1H), 7.80 (d, *J* = 8.5 Hz, 2H), 8.12 (d, *J* = 8.5  
157 Hz, 2H), 8.61 (s, 1H) ppm. <sup>13</sup>C NMR (100.6 MHz, CDCl<sub>3</sub>) δ 46.4 (2xCH), 52.3 (CH), 66.8 (2xCH), 122.0  
158 (CH), 125.3 (C), 126.4 (2xCH), 130.4 (2xCH), 131.5 (C), 136.9 (C), 147.8 (C), 154.2 (C), 154.7 (CH), 157.9  
159 (C), 166.4 (C) ppm. HRMS: calcd. for C<sub>18</sub>H<sub>18</sub>N<sub>3</sub>O<sub>3</sub>S [M+H]<sup>+</sup> 356.1063, found 356.1065.

**160 4-(6-(4-ethylphenyl)thieno[3,2-d]pyrimidin-4-yl)morpholine (19)**

161 From compound **6** (100 mg; 0.586 mmol), morpholine (102 mg; 1.172 mmol) followed by  
162 Pd(OAc)<sub>2</sub> (13 mg; 0.059 mmol), TTBP · HBF<sub>4</sub> (34 mg; 0.117 mmol), K<sub>2</sub>CO<sub>3</sub> (162 mg; 1.172 mmol), 1-  
163 bromo-4-ethylbenzene (217 mg; 1.172 mmol) and after purification by column chromatography using

a solvent gradient from neat petroleum ether to 40% AcOEt/petroleum ether, compound **20** was obtained as a white solid (103 mg, 54%), m.p. 186 – 188 °C. <sup>1</sup>H NMR (400 MHz, CDCl<sub>3</sub>) δ 1.29 (d, *J* = 7.6 Hz, 3H), 2.68 – 2.73 (m, 2H), 3.86 – 3.89 (m, 4H), 4.00 – 4.04 (m, 4H), 7.29 (d, *J* = 8.2 Hz, 2H), 7.59 (s, 1H), 7.65 (d, *J* = 8.2 Hz, 2H), 8.58 (s, 1H) ppm. <sup>13</sup>C NMR (100.6 MHz, CDCl<sub>3</sub>) δ 15.4 (CH), 28.7 (CH), 46.5 (2xCH), 66.8 (2xCH), 100.0 (C), 112.1 (C), 119.0 (C), 126.6 (2xCH), 127.6 (CH), 128.7 (2xCH), 130.0 (C), 155.3 (CH), 160.1 (C), 173.1 (C) ppm. HRMS: calcd. for C<sub>18</sub>H<sub>20</sub>N<sub>3</sub>OS [M+H]<sup>+</sup> 326.1322, found 326.1320.

#### 4-(6-(benzo[b]thiophen-2-yl)thieno[3,2-d]pyrimidin-4-yl)morpholine (20)

From compound **6** (100 mg; 0.586 mmol), morpholine (102 mg; 1.172 mmol) followed by Pd(OAc)<sub>2</sub> (13 mg; 0.059 mmol), TTBP · HBF<sub>4</sub> (34 mg; 0.117 mmol), K<sub>2</sub>CO<sub>3</sub> (162 mg; 1.172 mmol), 2-bromobenzothiophene (250 mg; 1.172 mmol) and after purification by column chromatography using a solvent gradient from neat petroleum ether to 55% AcOEt/petroleum ether, compound **21** was obtained as a yellow solid (89 mg, 43%), m.p. 209 – 211 °C. <sup>1</sup>H NMR (400 MHz, CDCl<sub>3</sub>) δ 3.87 – 3.89 (m, 4H), 3.99 – 4.02 (m, 4H), 7.37 – 7.40 (m, 2H), 7.58 (s, 1H), 7.63 (s, 1H), 7.79 – 7.85 (m, 2H), 8.60 (s, 1H) ppm. <sup>13</sup>C NMR (100.6 MHz, CDCl<sub>3</sub>) δ 46.4 (2xCH), 66.8 (2xCH), 114.1 (C), 121.9 (CH), 122.3 (CH), 122.6 (CH), 124.2 (CH), 125.1 (CH), 125.7 (CH), 135.4 (C), 139.8 (C), 140.0 (C), 142.4 (C), 154.7 (CH), 157.8 (C), 161.9 (C) ppm. HRMS: calcd. for C<sub>18</sub>H<sub>16</sub>N<sub>3</sub>OS<sub>2</sub> [M+H]<sup>+</sup> 354.0729, found 354.0731.

#### 4-(6-(naphthalen-1-yl)thieno[3,2-d]pyrimidin-4-yl)morpholine (21)

From compound **6** (100 mg; 0.586 mmol), morpholine (102 mg; 1.172 mmol) followed by Pd(OAc)<sub>2</sub> (13 mg; 0.059 mmol), TTBP · HBF<sub>4</sub> (34 mg; 0.117 mmol), K<sub>2</sub>CO<sub>3</sub> (162 mg; 1.172 mmol), 1-bromonaphthalene (242 mg; 1.172 mmol) and after purification by column chromatography using a solvent gradient from neat petroleum ether to 50% AcOEt/petroleum ether, compound **22** was obtained as a yellow solid (171 mg, 84%), m.p. 114 – 116 °C. <sup>1</sup>H NMR (400 MHz, CDCl<sub>3</sub>) δ 3.84 – 3.88 (m, 4H), 4.01 – 4.04 (m, 4H), 7.50 – 7.57 (m, 3H), 7.59 (s, 1H), 7.63 – 7.66 (m, 1H), 7.94 (dd, *J* = 5.3, 8.4 Hz, 2H), 8.21 (dd, *J* = 2.8, 6.7 Hz, 1H), 8.66 (s, 1H) ppm. <sup>13</sup>C NMR (100.6 MHz, CDCl<sub>3</sub>) δ 46.43 (2xCH), 66.8 (2xCH), 115.0 (C), 125.1 (CH), 125.2 (CH), 125.2 (CH), 126.5 (CH), 127.1 (CH), 128.3 (CH), 128.5 (CH), 129.9 (CH), 130.8 (C), 131.3 (C), 133.8 (C), 147.8 (C), 154.5 (CH), 157.9 (C), 161.8 (C) ppm. HRMS: calcd. for C<sub>20</sub>H<sub>18</sub>N<sub>3</sub>OS [M+H]<sup>+</sup> 348.1165, found 348.1166.

#### 4-(4-morpholinothieno[3,2-d]pyrimidin-6-yl)benzonitrile (22)

From compound **6** (100 mg; 0.586 mmol), morpholine (102 mg; 1.172 mmol) followed by Pd(OAc)<sub>2</sub> (13 mg; 0.059 mmol), TTBP · HBF<sub>4</sub> (34 mg; 0.117 mmol), K<sub>2</sub>CO<sub>3</sub> (162 mg; 1.172 mmol), 4-bromobenzonitrile (213 mg; 1.172 mmol) and after purification by column chromatography using a solvent gradient from neat petroleum ether to 60% AcOEt/petroleum ether, compound **23** was obtained as a yellow solid (104 mg, 55%), m.p. 255 – 257 °C. <sup>1</sup>H NMR (400 MHz, CDCl<sub>3</sub>) δ 8.61 (s, 1H), 7.83 (d, *J* = 8.6 Hz, 2H), 7.75 (d, *J* = 8.6 Hz, 2H), 7.70 (s, 1H), 4.01 (d, *J* = 5.1 Hz, 4H), 3.89 – 3.86 (m, 4H) ppm. <sup>13</sup>C NMR (100.6 MHz, CDCl<sub>3</sub>) δ 162.0 (C), 157.9 (C), 154.8 (CH), 146.6 (C), 137.1 (C), 132.9 (2xCH), 127.0 (2xCH), 122.8 (CH), 118.2 (C), 114.9 (C), 112.9 (C), 66.7 (2xCH), 46.4 (2xCH) ppm. HRMS: calcd. for C<sub>17</sub>H<sub>15</sub>N<sub>4</sub>OS [M+H]<sup>+</sup> 323.0961, found 323.0957.

#### N-((3s,5s,7s)-adamantan-1-yl)-6-phenylthieno[3,2-d]pyrimidin-4-amine (23)

From compound **6** (100 mg; 0.586 mmol), adamantylamine (177 mg; 1.172 mmol) followed by Pd(OAc)<sub>2</sub> (13 mg; 0.059 mmol), TTBP · HBF<sub>4</sub> (34 mg; 0.117 mmol), K<sub>2</sub>CO<sub>3</sub> (162 mg; 1.172 mmol), bromobenzene (184 mg; 1.172 mmol) and after purification by column chromatography using a solvent gradient from neat petroleum ether to 25% AcOEt/petroleum ether, compound **24** was obtained as a yellow solid (142 mg, 67%), m.p. 201 – 203 °C. <sup>1</sup>H NMR (400 MHz, CDCl<sub>3</sub>) δ 1.72 – 1.79 (m, 6H), 2.22 (d, *J* = 40.6 Hz, 9H), 4.47 (s, 1H), 7.37 – 7.48 (m, 3H), 7.55 (s, 1H), 7.71 (d, *J* = 8.4 Hz, 2H),

8.57 (s, 1H) ppm.  $^{13}\text{C}$  NMR (100.6 MHz,  $\text{CDCl}_3$ )  $\delta$  29.7 (3xCH), 36.4 (3xCH), 42.0 (3xCH), 53.6 (C), 115.3 (C), 121.0 (CH), 126.6 (2xCH), 129.1 (2xCH), 129.3 (CH), 133.3 (C), 148.2 (C), 154.8 (CH), 156.5 (C), 160.2 (C) ppm. HRMS: calcd. for  $\text{C}_{22}\text{H}_{24}\text{N}_3\text{S}$   $[\text{M}+\text{H}]^+$  362.1685, found 362.1684.

#### General procedure for synthesis of 15 and 24 from 6 (one pot 3 steps “C-2” and “C-3” CH activation)

A solution of 4-chlorothieno[3,2-d]pyrimidine (**6**) (100 mg; 0.586 mmol) and morpholine (1.172 mmol) was heated at 100 °C in dry toluene, for 20 min. Then,  $\text{Pd}(\text{OAc})_2$  (0.059 mmol), TTBP· $\text{HBF}_4$  (0.117 mmol),  $\text{K}_2\text{CO}_3$  (1.172 mmol) and bromo derivative (1.172 mmol) were added. The reaction mixture was stirred at same temperature for 46h. Then,  $\text{Pd}(\text{OAc})_2$  (0.059 mmol), TTBP· $\text{HBF}_4$  (0.117 mmol),  $\text{K}_2\text{CO}_3$  (1.172 mmol) and bromo derivative (1.172 mmol) were added. The reaction mixture was stirred at 130 °C for 46h. The reaction was followed by TLC. After completion, the mixture was concentrated under vacuum. The solid obtained was purified by column chromatography. The solvent polarity was increased via a gradient from neat petroleum ether to a mixture of AcOEt/petroleum ether.

#### 4-(6,7-diphenylthieno[3,2-d]pyrimidin-4-yl)morpholine (**15**)

From compound **6** (100 mg; 0.586 mmol), morpholine (102 mg; 1.172 mmol) followed 2 times by  $\text{Pd}(\text{OAc})_2$  (13 mg; 0.059 mmol), TTBP ·  $\text{HBF}_4$  (34 mg; 0.117 mmol),  $\text{K}_2\text{CO}_3$  (162 mg; 1.172 mmol), bromobenzene (184 mg; 1.172 mmol) and after purification by column chromatography using a solvent gradient from neat petroleum ether to 3% AcOEt/petroleum ether, compound **15** was obtained as a yellow solid (105 mg, 48 %), m.p. 182 – 184 °C.  $^1\text{H}$  NMR (400 MHz,  $\text{CDCl}_3$ )  $\delta$  3.82 – 3.85 (m, 4H), 3.97 – 4.00 (m, 4H), 7.23 – 7.37 (m, 10H), 8.64 (s, 1H) ppm.  $^{13}\text{C}$  NMR (100.6 MHz,  $\text{CDCl}_3$ )  $\delta$  46.5 (2xCH), 66.8 (2xCH), 114.4 (C), 127.7 (CH), 128.5 (2xCH), 128.7 (2xCH), 128.8 (CH), 129.5 (2xCH), 130.7 (2xCH), 133.1 (C), 133.6 (2xC), 145.0 (C), 154.7 (CH), 158.0 (C), 161.0 (C) ppm. HRMS: calcd. for  $\text{C}_{22}\text{H}_{20}\text{N}_3\text{OS}$   $[\text{M}+\text{H}]^+$  374.1322, found 374.1320.

#### 4-(4-morpholino-6-phenylthieno[3,2-d]pyrimidin-7-yl)benzonitrile (**24**)

From compound **6** (100 mg; 0.586 mmol), morpholine (102 mg; 1.172 mmol) followed 2 times by  $\text{Pd}(\text{OAc})_2$  (13 mg; 0.059 mmol), TTBP ·  $\text{HBF}_4$  (34 mg; 0.117 mmol),  $\text{K}_2\text{CO}_3$  (162 mg; 1.172 mmol), bromobenzene (184 mg; 1.172 mmol) or 4-bromobenzonitrile (213 mg; 1.172 mmol) and after purification by column chromatography using a solvent gradient from neat petroleum ether to 9% AcOEt/petroleum ether, compound **25** was obtained as a yellow solid (84 mg, 36%), m.p. 227 – 229 °C.  $^1\text{H}$  NMR (400 MHz,  $\text{CDCl}_3$ )  $\delta$  3.87 – 3.90 (m, 4H), 4.02 – 4.05 (m, 4H), 7.28 – 7.40 (m, 5H), 7.53 (d,  $J$  = 8.5 Hz, 2H), 7.65 (d,  $J$  = 8.5 Hz, 2H), 8.63 (s, 1H) ppm.  $^{13}\text{C}$  NMR (100.6 MHz,  $\text{CDCl}_3$ )  $\delta$  46.5 (2xCH), 66.8 (2xCH), 111.3 (C), 114.5 (C), 118.9 (C), 129.0 (2xCH), 129.4 (CH), 129.5 (2xCH), 131.6 (2xCH), 160.3 (C), 132.1 (2xCH), 132.3 (C), 138.6 (C), 146.6 (C), 154.8 (CH), 158.0 (C) ppm. HRMS: calcd. for  $\text{C}_{23}\text{H}_{19}\text{N}_4\text{OS}$   $[\text{M}+\text{H}]^+$  399.1274, found 399.1271.

#### General procedure for synthesis of 25-29 from 2

A solution of **2** (50 mg; 0.237 mmol),  $\text{Pd}(\text{OAc})_2$  (0.024 mmol), TTBP ·  $\text{HBF}_4$  (0.047 mmol),  $\text{K}_2\text{CO}_3$  (0.473 mmol) and bromo derivative (0.473 mmol) was heated at 130 °C in dry toluene, for 46h. The reaction was followed by TLC. After completion, the mixture was concentrated under vacuum. The solid obtained was purified by column chromatography. The solvent polarity was increased via a gradient from neat petroleum ether to a mixture of AcOEt/petroleum ether.

#### 2,3-diphenylthieno[3,2-b]pyridine (**25**) [11]

From compound **2** (50 mg; 0.237 mmol), Pd(OAc)<sub>2</sub> (5 mg; 0.024 mmol), TTBP · HBF<sub>4</sub> (14 mg; 0.047 mmol), K<sub>2</sub>CO<sub>3</sub> (65 mg; 0.473 mmol), bromobenzene (74 mg; 0.473 mmol) and after purification by column chromatography using a solvent gradient from neat petroleum ether to 4% AcOEt/petroleum ether, compound **26** was obtained as a white solid (62 mg, 91%), m.p. 139 – 141 °C. <sup>1</sup>H NMR (400 MHz, CDCl<sub>3</sub>) δ 7.27–7.45 (m, 11H), 8.21 (dd, *J* = 1.6, 8.1 Hz, 1H), 8.73 (dd, *J* = 1.6, 4.6 Hz, 1H) ppm. <sup>13</sup>C NMR (100.6 MHz, CDCl<sub>3</sub>) δ 118.9 (CH), 127.6 (CH), 128.4 (CH), 128.4 (2xCH), 128.5 (2xCH), 128.6 (2xCH), 129.9 (CH), 130.8 (2xCH), 133.2 (C), 133.6 (C), 134.1 (C), 134.2 (C), 143.7 (C), 147.6 (CH), 155.5 (C) ppm.

#### 2-phenyl-3-(p-tolyl)thieno[3,2-b]pyridine (**26**) [11]

From compound **2** (50 mg; 0.237 mmol), Pd(OAc)<sub>2</sub> (5 mg; 0.024 mmol), TTBP · HBF<sub>4</sub> (14 mg; 0.047 mmol), K<sub>2</sub>CO<sub>3</sub> (65 mg; 0.473 mmol), 4-bromotoluene (81 mg; 0.473 mmol) and after purification by column chromatography using a solvent gradient from neat petroleum ether to 3% AcOEt/petroleum ether, compound **28** was obtained as a white solid (46 mg, 65%), m.p. 138 – 140 °C. <sup>1</sup>H NMR (400 MHz, CDCl<sub>3</sub>) δ 2.38 (s, 3H), 7.20–7.41 (m, 10H), 8.18 (dd, *J* = 1.6, 8.1 Hz, 1H), 8.71 (dd, *J* = 1.6, 4.6 Hz, 1H) ppm. <sup>13</sup>C NMR (100.6 MHz, CDCl<sub>3</sub>) δ 21.4 (CH), 118.8 (CH), 128.3 (CH), 128.5 (2xCH), 129.2 (2xCH), 129.5 (2xCH), 129.8 (CH), 130.6 (2xCH), 131.2 (C), 133.1 (C), 133.6 (C), 134.3 (C), 137.2 (C), 143.2 (C), 147.5 (CH), 155.7 (C) ppm.

#### methyl 4-(2-phenylthieno[3,2-b]pyridin-3-yl)benzoate (**27**)

From compound **2** (50 mg; 0.237 mmol), Pd(OAc)<sub>2</sub> (5 mg; 0.024 mmol), TTBP · HBF<sub>4</sub> (14 mg; 0.047 mmol), K<sub>2</sub>CO<sub>3</sub> (65 mg; 0.473 mmol), methyl 4-bromobenzoate (102 mg; 0.473 mmol) and after purification by column chromatography using a solvent gradient from neat petroleum ether to 3% AcOEt/petroleum ether, compound **29** was obtained as a white solid (73 mg, 89%), m.p. 173 – 175 °C. <sup>1</sup>H NMR (400 MHz, CDCl<sub>3</sub>) δ 3.92 (s, 3H), 7.32 (ddt, *J* = 4.4, 8.1, 12.3 Hz, 6H), 7.53 – 7.57 (m, 2H), 8.04 – 8.08 (m, 2H), 8.20 (dd, *J* = 1.5, 8.1 Hz, 1H), 8.72 (dd, *J* = 1.5, 4.6 Hz, 1H) ppm. <sup>13</sup>C NMR (100.6 MHz, CDCl<sub>3</sub>) δ 52.1 (CH), 119.1 (CH), 128.7 (CH), 128.7 (2xCH), 129.0 (C), 129.6 (2xCH), 129.7 (2xCH), 130.0 (CH), 130.9 (2xCH), 132.4 (C), 133.3 (C), 133.7 (C), 139.2 (C), 144.8 (C), 147.7 (CH), 155.0 (C), 167.1 (C) ppm. HRMS: calcd. for C<sub>21</sub>H<sub>16</sub>NO<sub>2</sub>S [M+H]<sup>+</sup> 346.0896, found 346.0903.

#### 3-(4-ethylphenyl)-2-phenylthieno[3,2-b]pyridine (**28**)

From compound **2** (50 mg; 0.237 mmol), Pd(OAc)<sub>2</sub> (5 mg; 0.024 mmol), TTBP · HBF<sub>4</sub> (14 mg; 0.047 mmol), K<sub>2</sub>CO<sub>3</sub> (65 mg; 0.473 mmol), 1-bromo-4-ethylbenzene (87 mg; 0.473 mmol) and after purification by column chromatography using a solvent gradient from neat petroleum ether to 2% AcOEt/petroleum ether, compound **30** was obtained as a white solid (31 mg, 41%), m.p. 118 – 120 °C. <sup>1</sup>H NMR (400 MHz, CDCl<sub>3</sub>) δ 1.27 (t, *J* = 7.6 Hz, 3H), 2.68 (q, *J* = 7.6 Hz, 2H), 7.21 – 7.24 (m, 2H), 7.26 – 7.32 (m, 4H), 7.34 – 7.41 (m, 4H), 8.18 (dd, *J* = 1.5, 8.1 Hz, 1H), 8.72 (dd, *J* = 1.5, 4.6 Hz, 1H) ppm. <sup>13</sup>C NMR (100.6 MHz, CDCl<sub>3</sub>) δ 15.3 (CH), 28.7 (CH), 118.8 (CH), 128.0 (2xCH), 128.3 (CH), 128.5 (2xCH), 129.6 (2xCH), 129.9 (CH), 130.6 (2xCH), 131.4 (C), 133.2 (C), 133.6 (C), 134.3 (C), 143.3 (C), 143.4 (C), 147.5 (CH), 155.6 (C) ppm. HRMS: calcd. for C<sub>21</sub>H<sub>18</sub>NS [M+H]<sup>+</sup> 316.1154, found 316.1156.

#### 4-(2-phenylthieno[3,2-b]pyridin-3-yl)benzonitrile (**29**) [11]

From compound **2** (50 mg; 0.237 mmol), Pd(OAc)<sub>2</sub> (5 mg; 0.024 mmol), TTBP · HBF<sub>4</sub> (14 mg; 0.047 mmol), K<sub>2</sub>CO<sub>3</sub> (65 mg; 0.473 mmol), 4-bromobenzonitrile (86 mg; 0.473 mmol) and after purification by column chromatography using a solvent gradient from neat petroleum ether to 10% AcOEt/petroleum ether, compound **31** was obtained as a white solid (62 mg, 84%), m.p. 182–184 °C. <sup>1</sup>H NMR (400 MHz, CDCl<sub>3</sub>) δ 7.30–7.36 (m, 6H), 7.59 (d, *J* = 8.7 Hz, 2H), 7.69 (d, *J* = 8.0 Hz, 2H), 8.22 (dd, *J* = 1.5, 8.1 Hz, 1H), 8.72 (dd, *J* = 1.5, 4.6 Hz, 1H) ppm. <sup>13</sup>C NMR (100.6 MHz, CDCl<sub>3</sub>) δ 111.1 (C),

119.0 (C), 119.3 (CH), 128.9 (2xCH), 129.0 (CH), 129.6 (2xCH), 130.2 (CH), 131.3 (C), 131.6 (2xCH), 132.1 (2xCH), 133.3 (C), 139.2 (C), 145.5 (C), 147.7 (CH), 154.6 (C) ppm.

#### General procedure for synthesis of 30-32 from 4

A solution of 4 (50 mg; 0.235 mmol), Pd(OAc)<sub>2</sub> (0.024 mmol), TTBP · HBF<sub>4</sub> (0.047 mmol), K<sub>2</sub>CO<sub>3</sub> (0.470 mmol) and bromo derivative (0.470 mmol) was heated at 130 °C in dry toluene, for 46h. The reaction was followed by TLC. After completion, the mixture was concentrated under vacuum. The solid obtained was purified by column chromatography. The solvent polarity was increased via a gradient from neat petroleum ether to a mixture of AcOEt/petroleum ether.

#### 6,7-diphenylthieno[2,3-b]pyrazine (30) [11]

From compound 4 (50 mg; 0.235 mmol), Pd(OAc)<sub>2</sub> (5 mg; 0.024 mmol), TTBP · HBF<sub>4</sub> (14 mg; 0.047 mmol), K<sub>2</sub>CO<sub>3</sub> (65 mg; 0.470 mmol), bromobenzene (74 mg; 0.470 mmol) and after purification by column chromatography using a solvent gradient from neat petroleum ether to 9% AcOEt/petroleum ether, compound 32 was obtained as a white solid (32 mg, 47%), m.p. 155-157 °C. <sup>1</sup>H NMR (400 MHz, CDCl<sub>3</sub>) δ 7.35-7.45 (m, 10H), 8.52 (d, *J* = 2.4 Hz, 1H), 8.68 (d, *J* = 2.4 Hz, 1H) ppm. <sup>13</sup>C NMR (100.6 MHz, CDCl<sub>3</sub>) δ 127.9 (CH), 128.6 (2xCH), 128.7 (2xCH), 128.9 (CH), 129.7 (2xCH), 130.6 (2xCH), 131.2 (C), 133.2 (C), 133.5 (C), 140.3 (CH), 142.0 (CH), 144.6 (C), 149.8 (C), 155.6 (C) ppm.

#### 6-phenyl-7-(p-tolyl)thieno[2,3-b]pyrazine (31) [11]

From compound 4 (50 mg; 0.235 mmol), Pd(OAc)<sub>2</sub> (5 mg; 0.024 mmol), TTBP · HBF<sub>4</sub> (14 mg; 0.047 mmol), K<sub>2</sub>CO<sub>3</sub> (65 mg; 0.470 mmol), 4-bromotoluene (80 mg; 0.470 mmol) and after purification by column chromatography using a solvent gradient from neat petroleum ether to 3% AcOEt/petroleum ether, compound 33 was obtained as a white solid (22 mg, 31%), m.p. 172-174 °C. <sup>1</sup>H NMR (400 MHz, CDCl<sub>3</sub>) δ 2.39 (s, 3H), 7.22 (d, *J* = 8.0 Hz, 2H), 7.31-7.34 (m, 5H), 7.42-7.44 (m, 2H), 8.49 (d, *J* = 2.4 Hz, 1H), 8.65 (d, *J* = 2.4 Hz, 1H) ppm. <sup>13</sup>C NMR (100.6 MHz, CDCl<sub>3</sub>) δ 21.4 (CH), 128.7 (2xCH), 128.8 (CH), 129.3 (2xCH), 129.6 (2xCH), 130.2 (C), 130.4 (2xCH), 131.2 (C), 133.6 (C), 137.7 (C), 140.2 (CH), 142.0 (CH), 144.1 (C), 150.0 (C), 155.6 (C) ppm.

#### 4-(6-phenylthieno[2,3-b]pyrazin-7-yl)benzonitrile (32) [11]

From compound 4 (50 mg; 0.235 mmol), Pd(OAc)<sub>2</sub> (5 mg; 0.024 mmol), TTBP · HBF<sub>4</sub> (14 mg; 0.047 mmol), K<sub>2</sub>CO<sub>3</sub> (65 mg; 0.470 mmol), 4-bromobenzonitrile (86 mg; 0.470 mmol) and after purification by column chromatography using a solvent gradient from neat petroleum ether to 5% AcOEt/petroleum ether, compound 34 was obtained as a white solid (28 mg, 38%), m.p. 219-221 °C. <sup>1</sup>H NMR (400 MHz, CDCl<sub>3</sub>) δ 7.36-7.40 (m, 5H), 7.57 (d, *J* = 8 Hz, 2H), 7.70 (d, *J* = 8 Hz, 2H), 8.54 (d, *J* = 2.4 Hz, 1H), 8.66 (d, *J* = 2.4 Hz, 1H) ppm. <sup>13</sup>C NMR (100.6 MHz, CDCl<sub>3</sub>) δ 111.5 (C), 118.8 (C), 128.9 (C), 129.1 (2xCH), 129.5 (CH), 129.7 (2xCH), 131.4 (2xCH), 132.2 (2xCH), 132.7 (C), 138.0 (C), 140.8 (CH), 142.1 (CH), 146.4 (C), 149.0 (C), 155.6 (C) ppm.

329

#### 1.3. <sup>1</sup>H NMR, <sup>13</sup>C NMR and <sup>19</sup>F NMR Spectra of all Products

331

332

## 4-(thieno[3,2-d]pyrimidin-4-yl)morpholine (7)

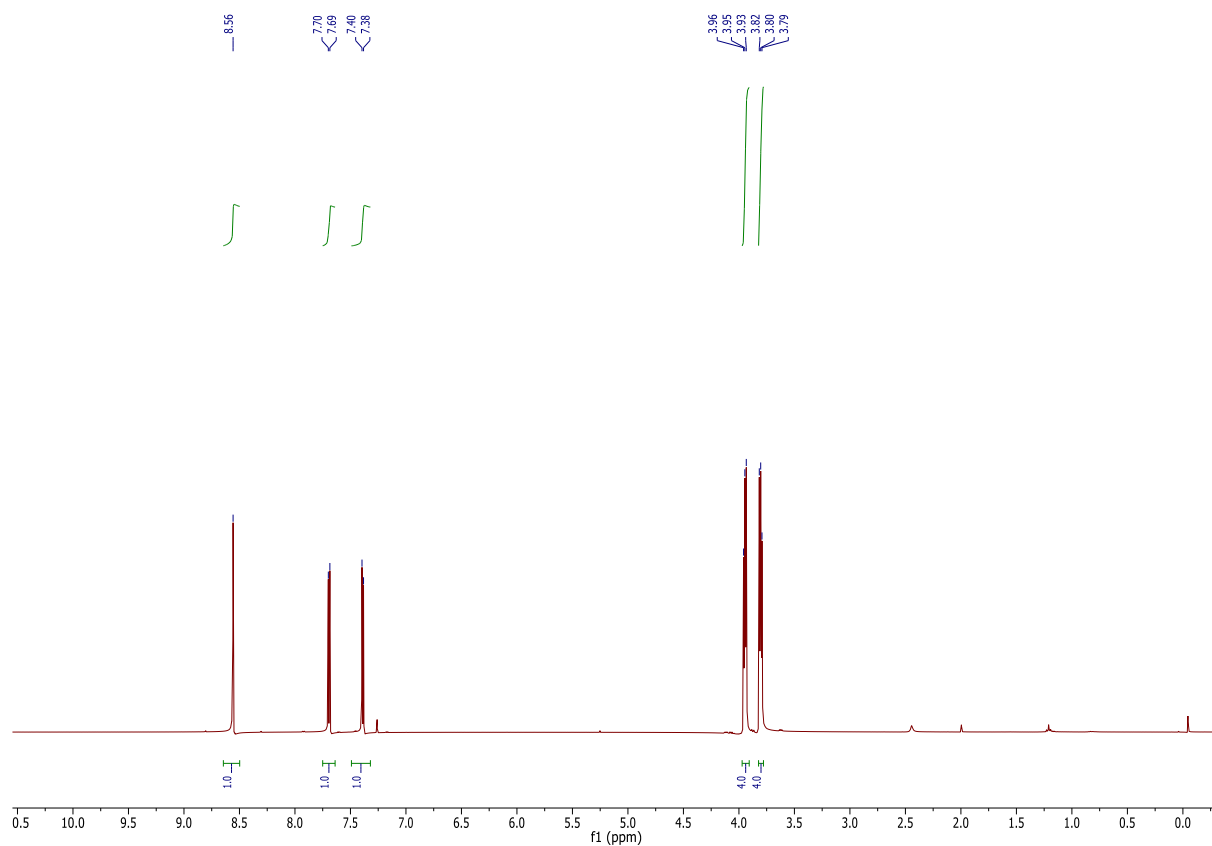

333

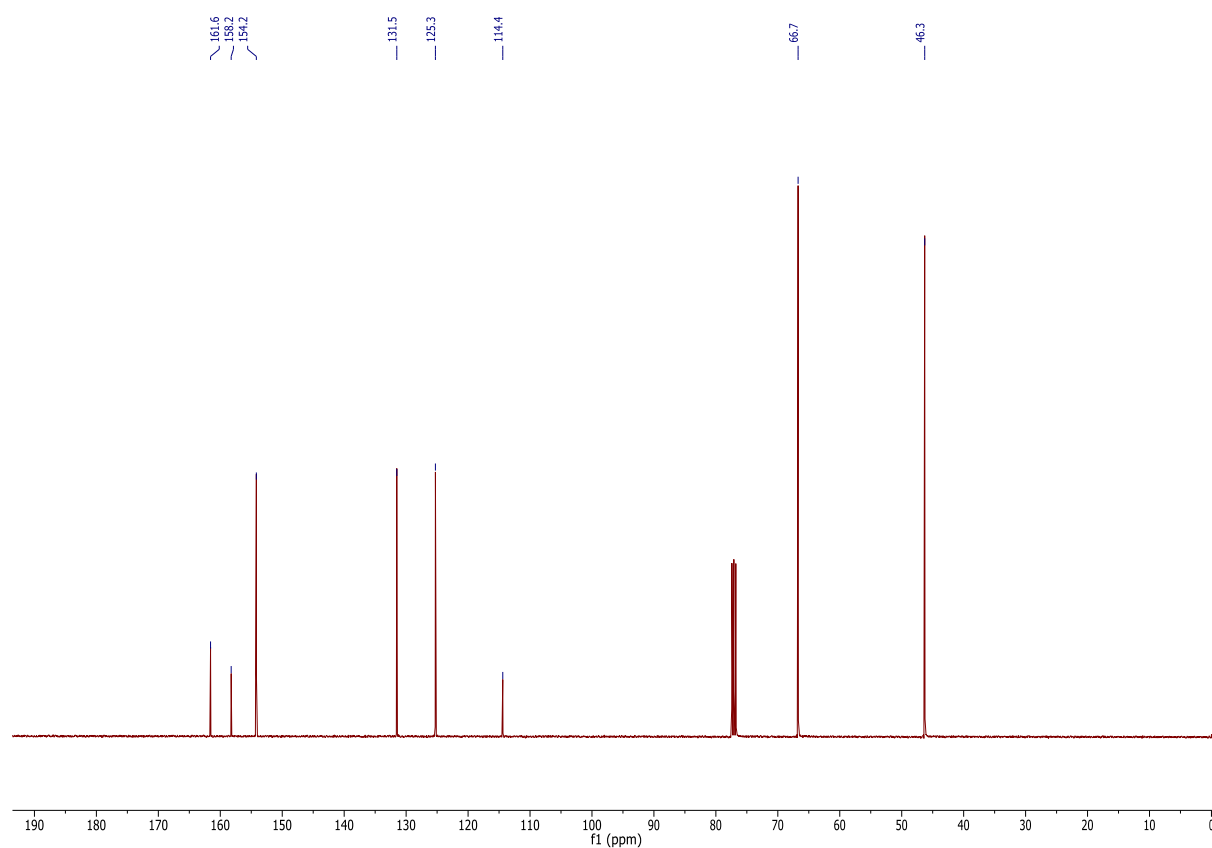

334

335

**N,N-dibutylthieno[3,2-d]pyrimidin-4-amine (8)**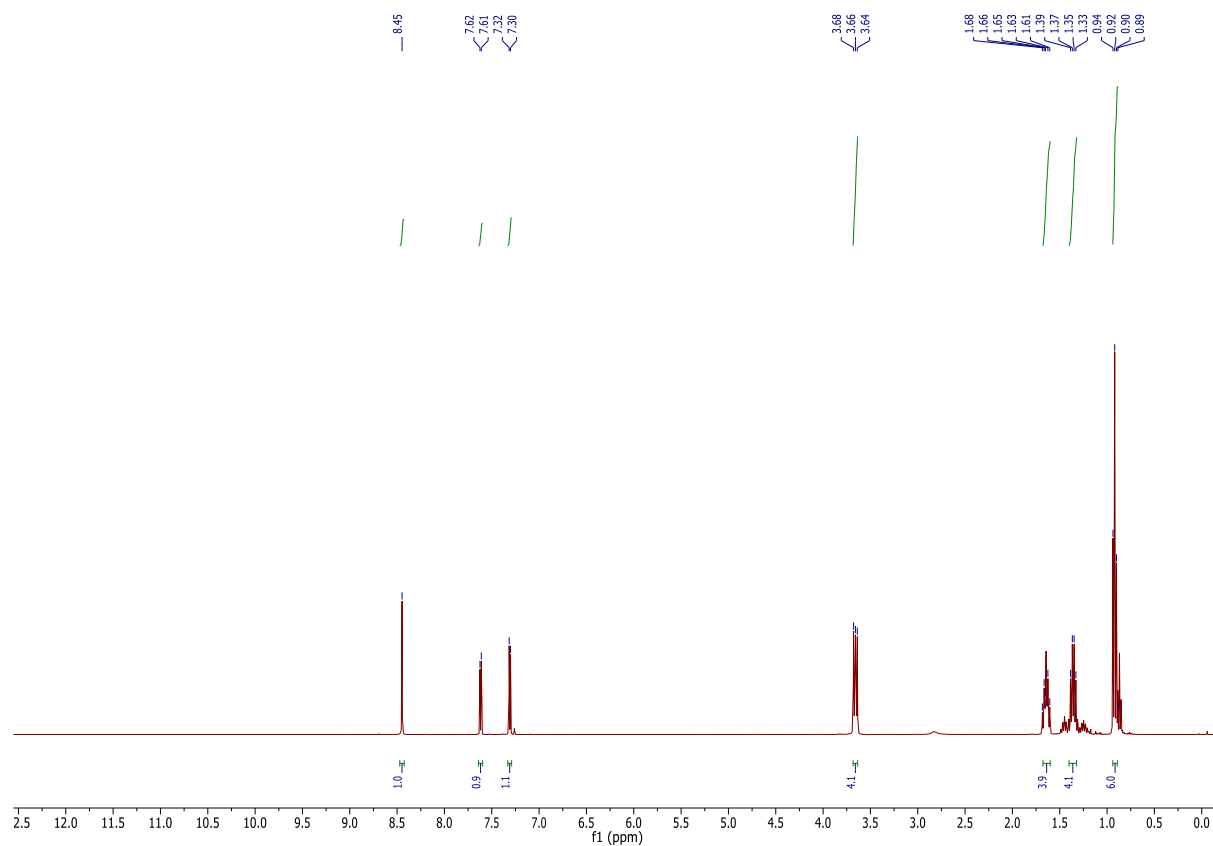

336

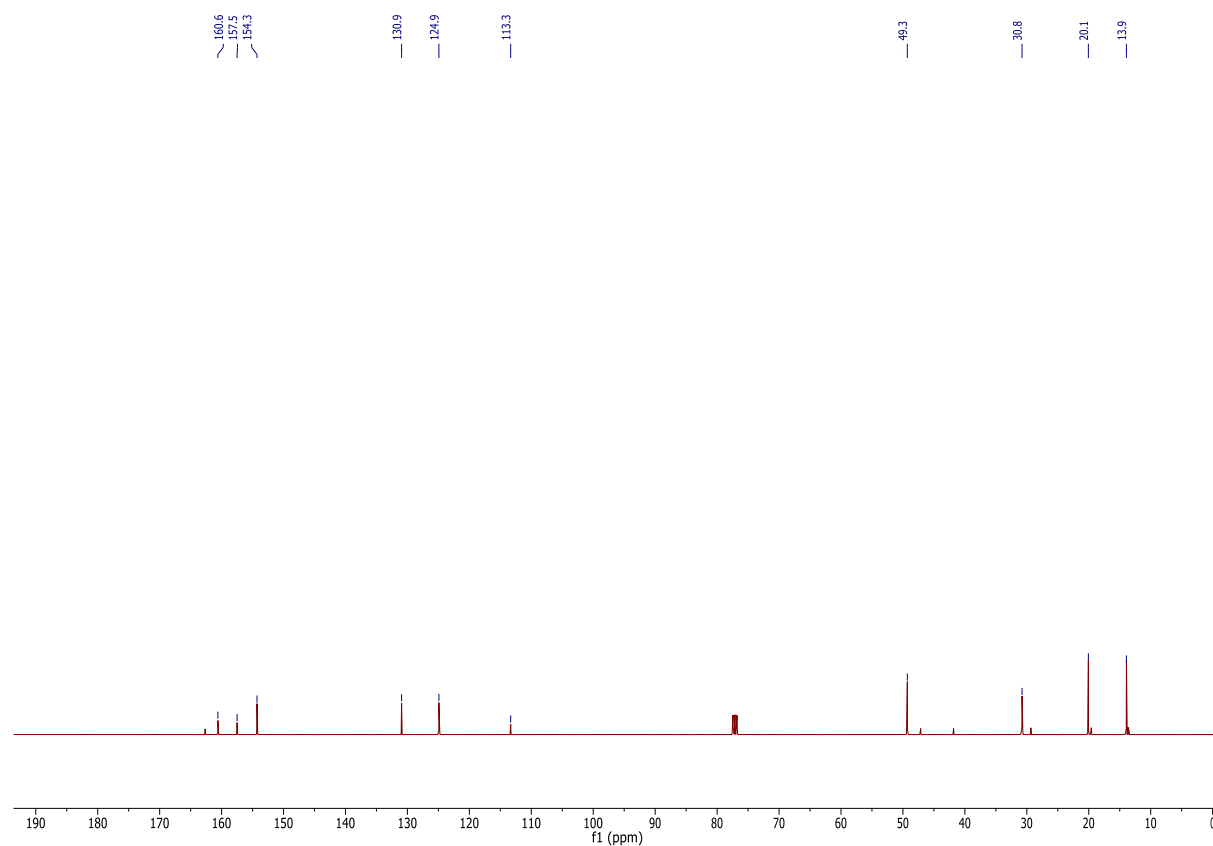

337

338

## 4-(piperidin-1-yl)thieno[3,2-d]pyrimidine (9)

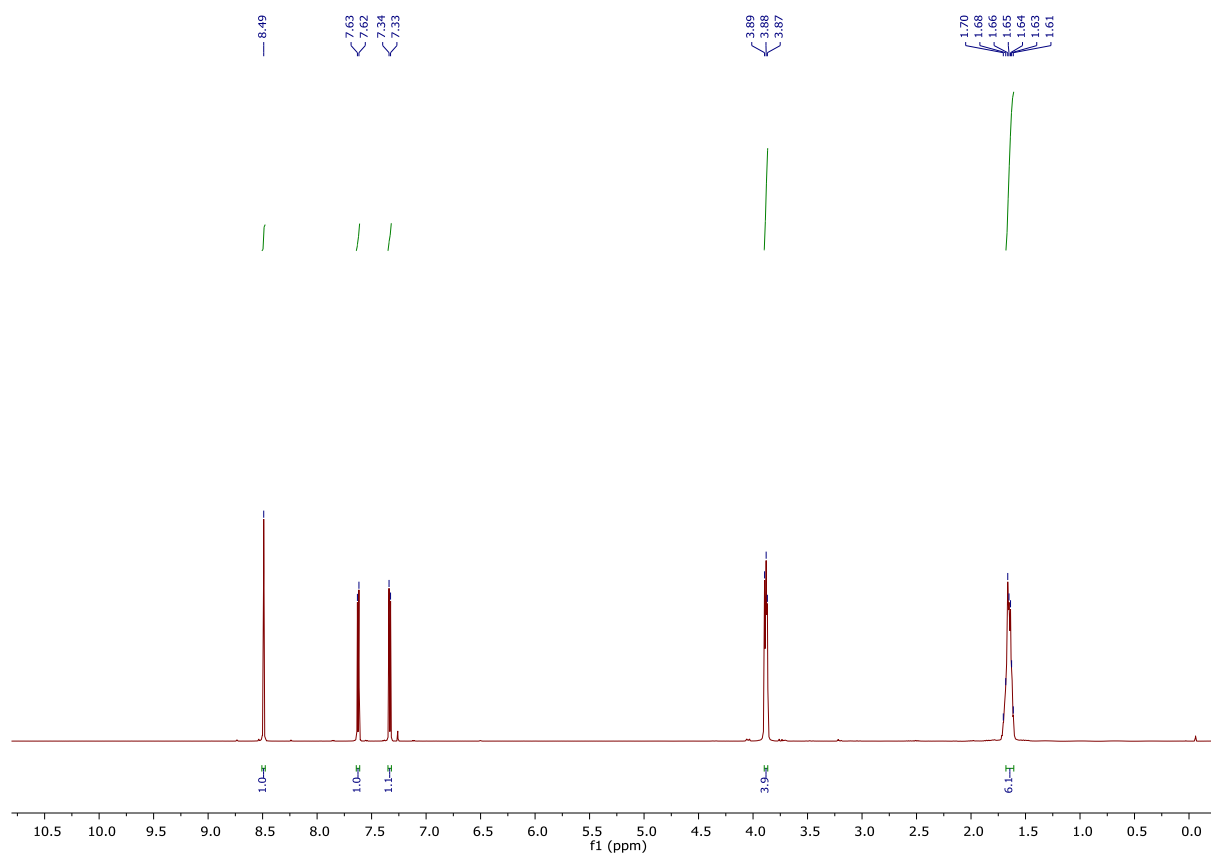

339

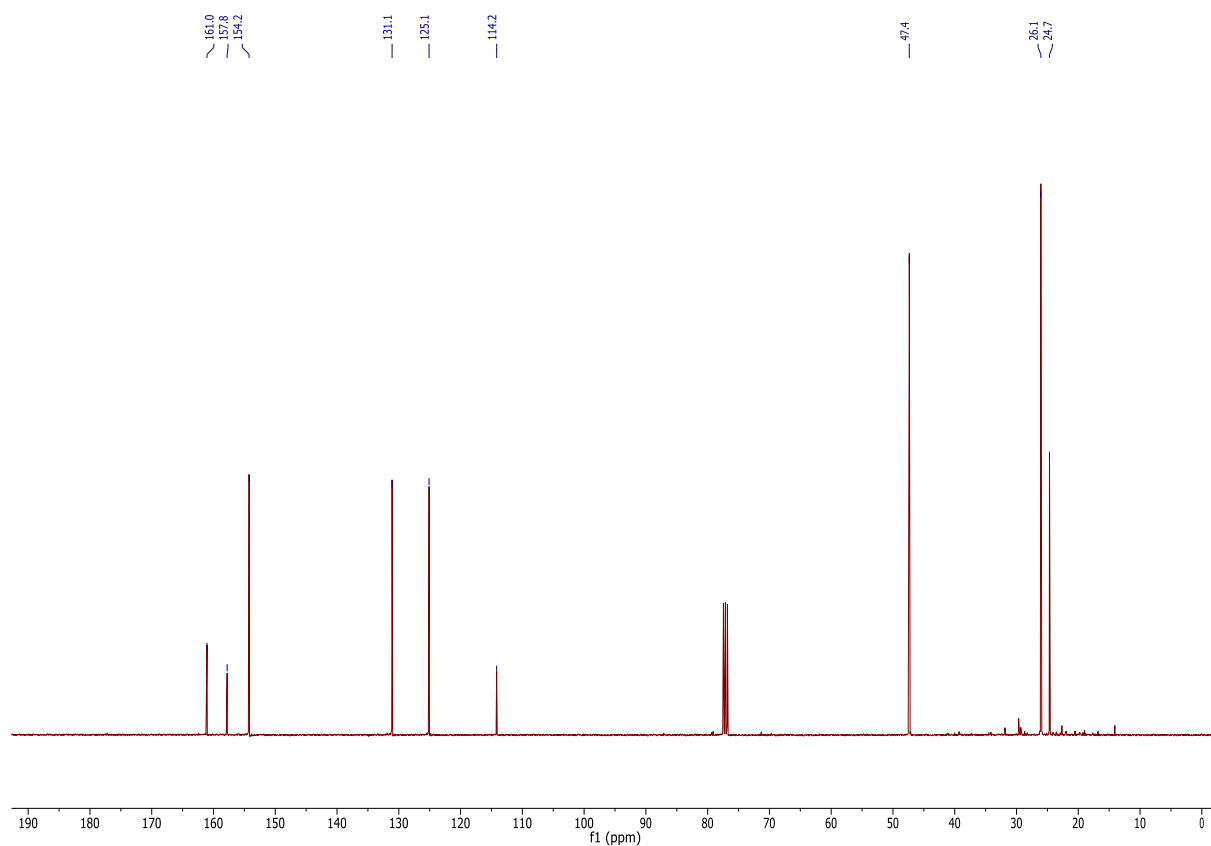

340

341

342

## N-(2-(trifluoromethyl)phenyl)thieno[3,2-d]pyrimidin-4-amine (10)

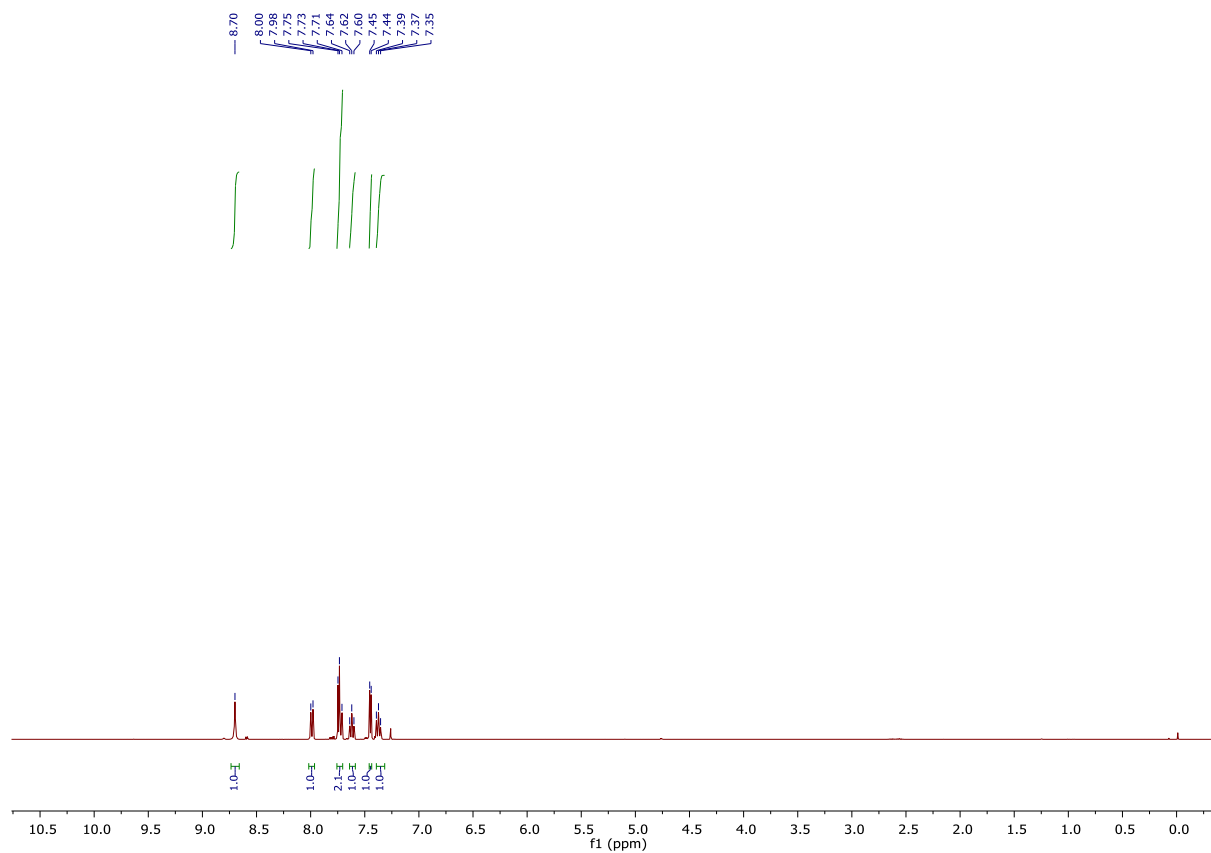

343

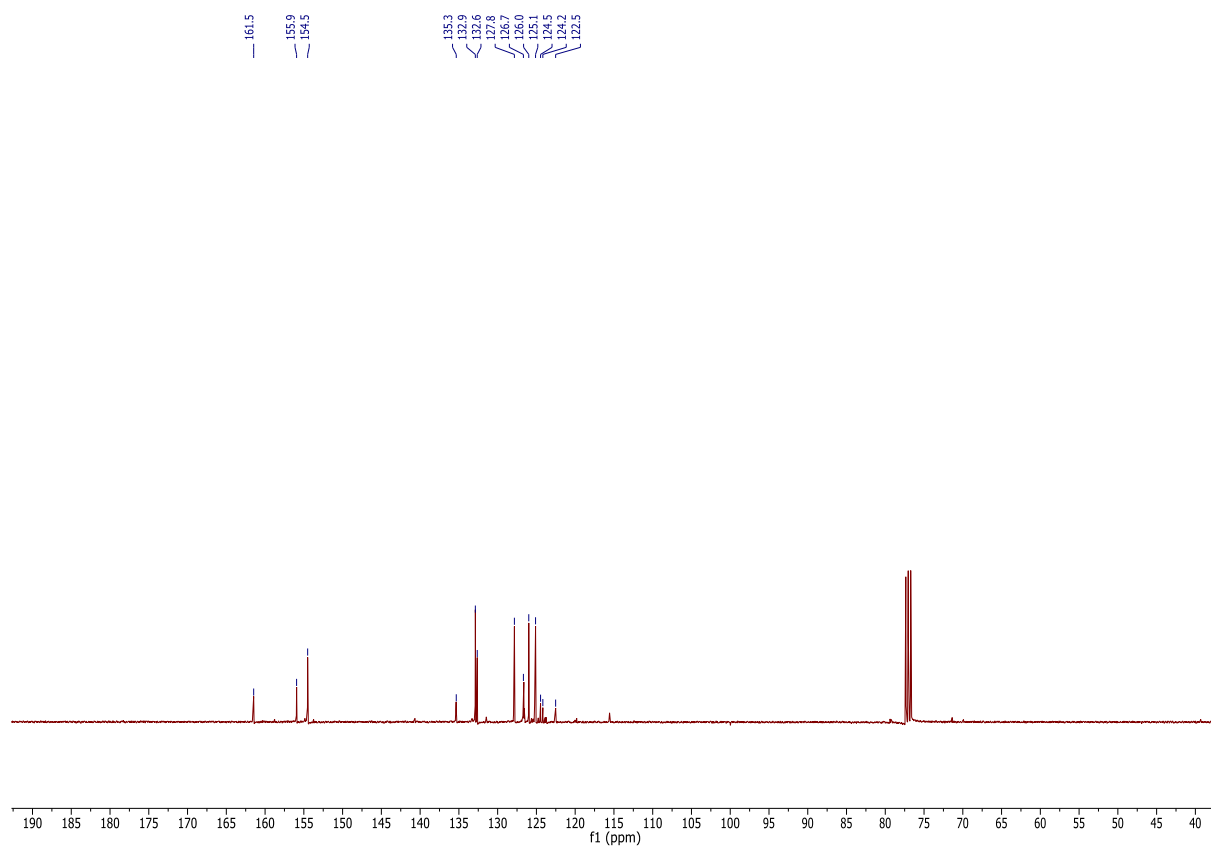

344

345

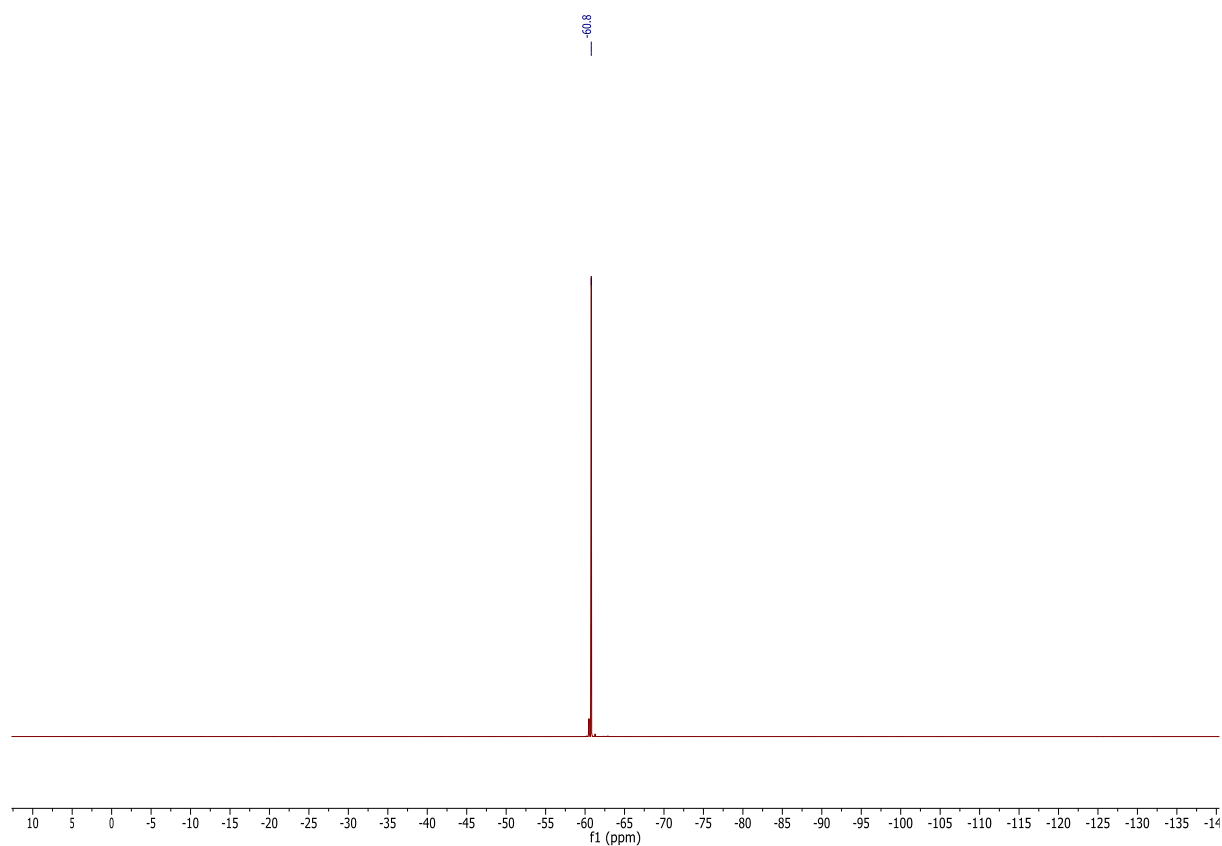

346

347

348

349

350

351

352

353

354

355

356

357

358

359

360

**N-(4-methoxyphenyl)thieno[3,2-d]pyrimidin-4-amine (11)**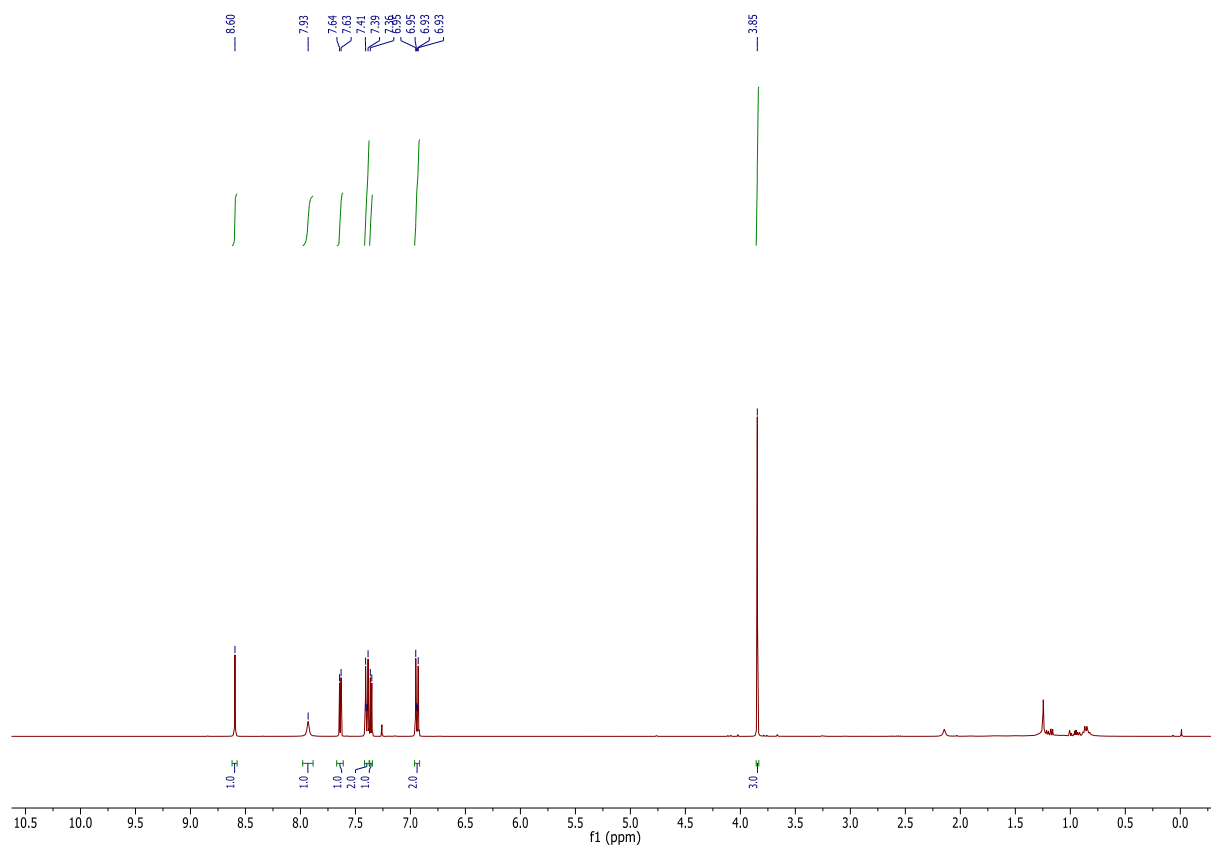

361

362

363

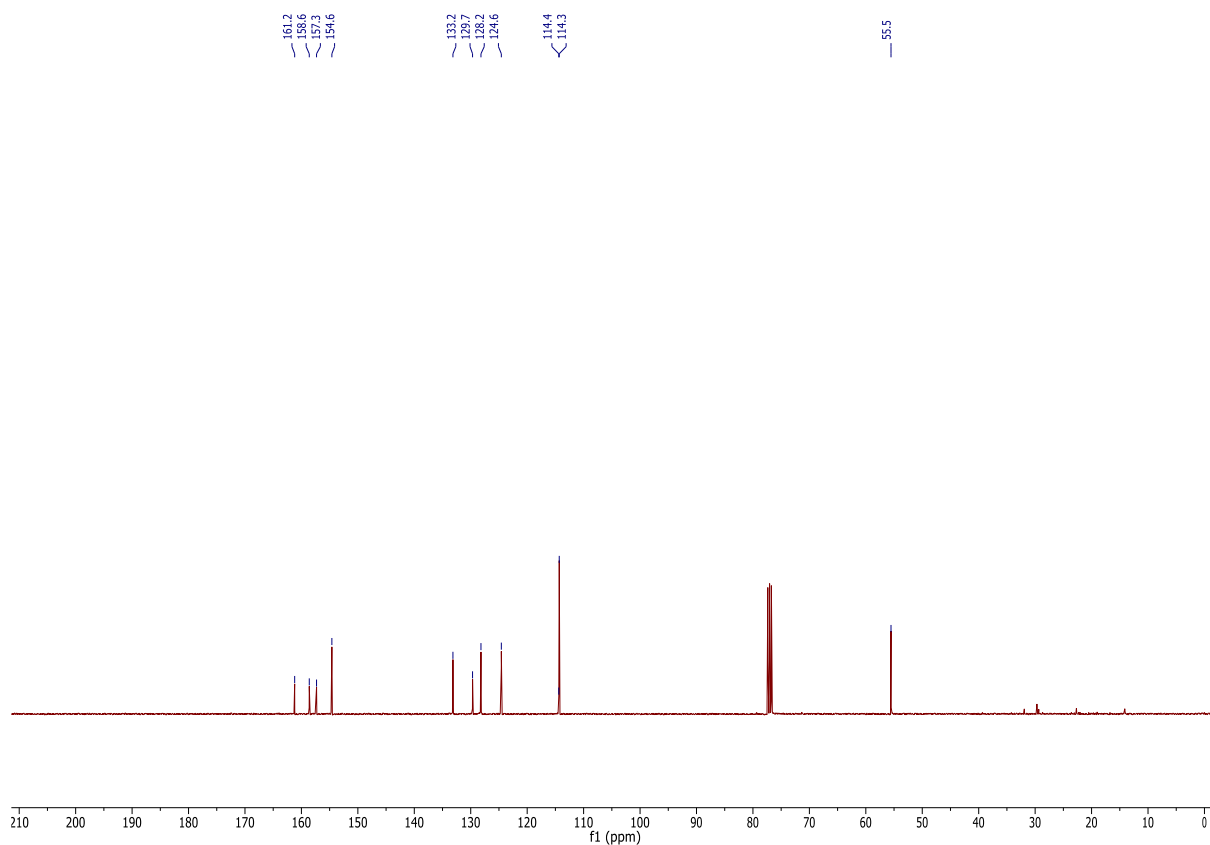

364

**methyl 4-(thieno[3,2-d]pyrimidin-4-ylamino)benzoate (12)**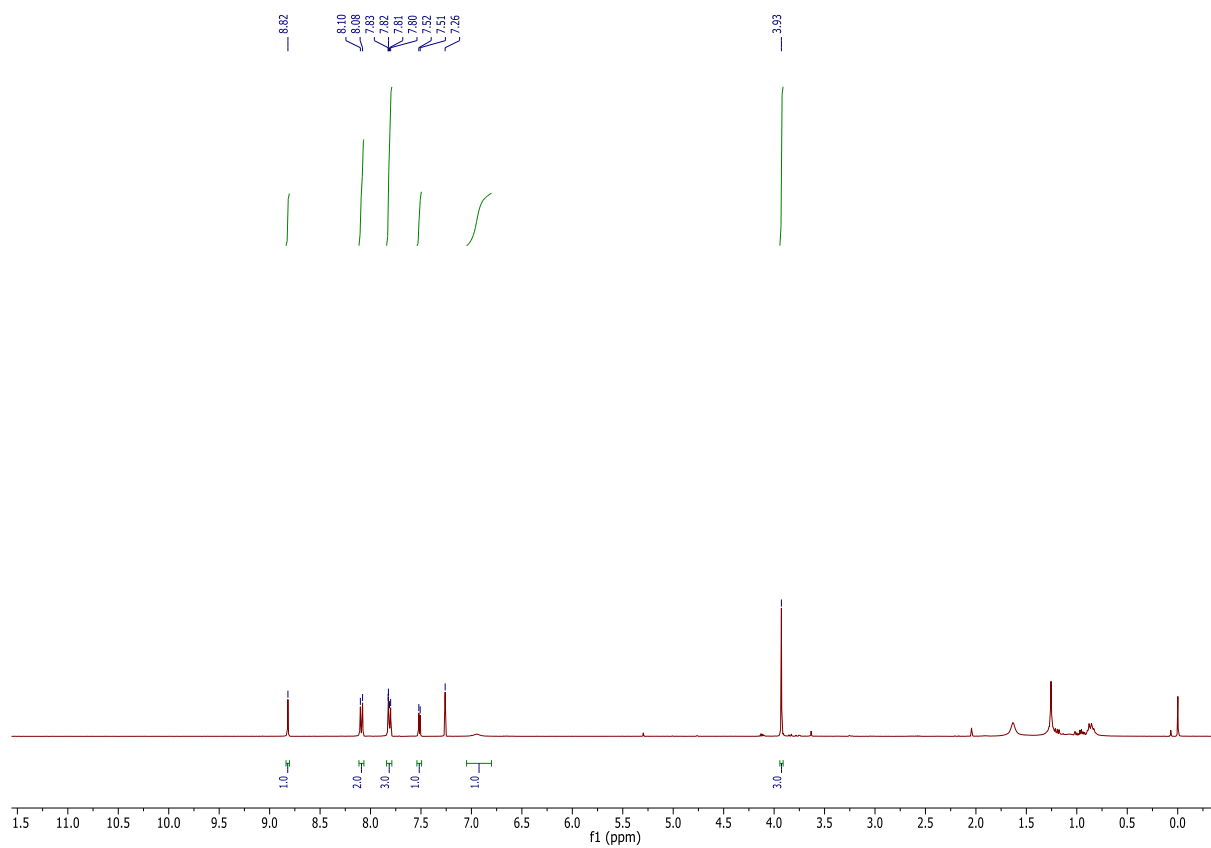

365

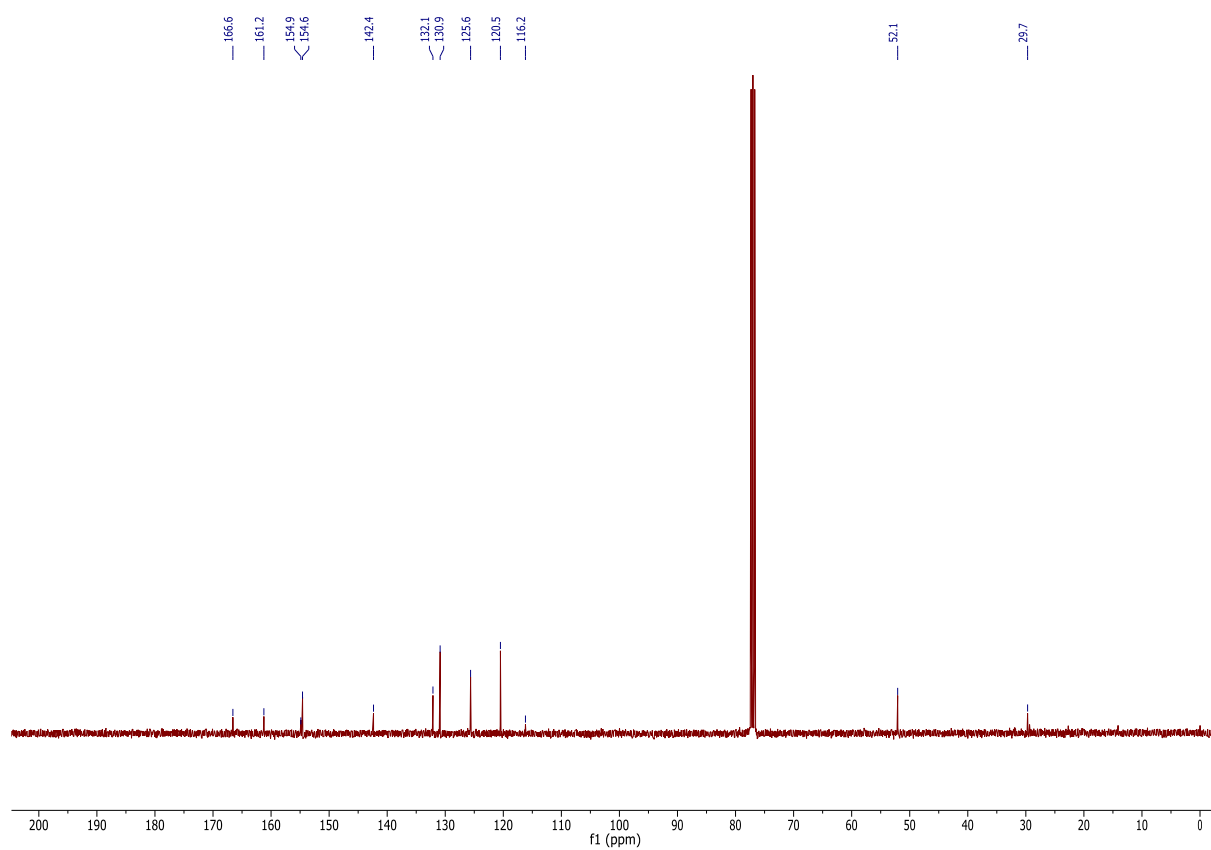

366

367

368

## N-((3s,5s,7s)-adamantan-1-yl)thieno[3,2-d]pyrimidin-4-amine (13)

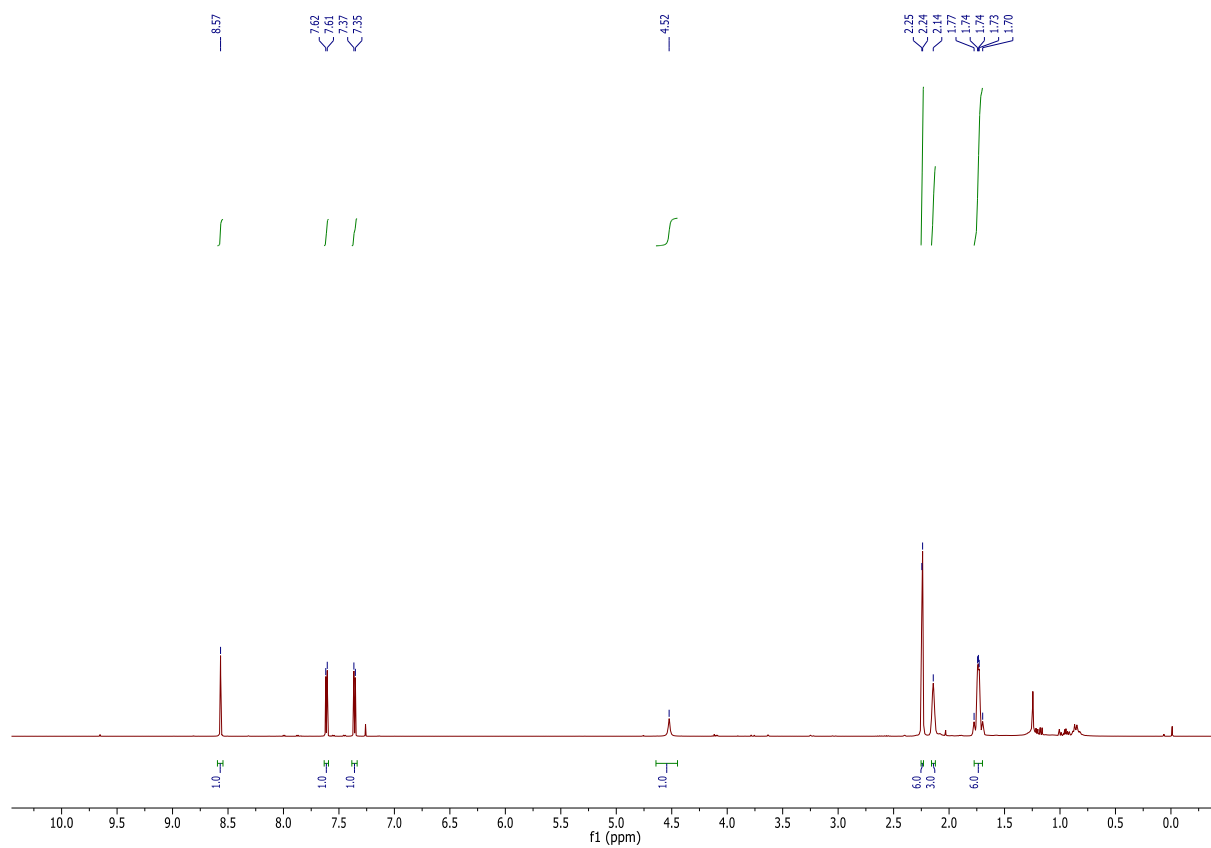

369

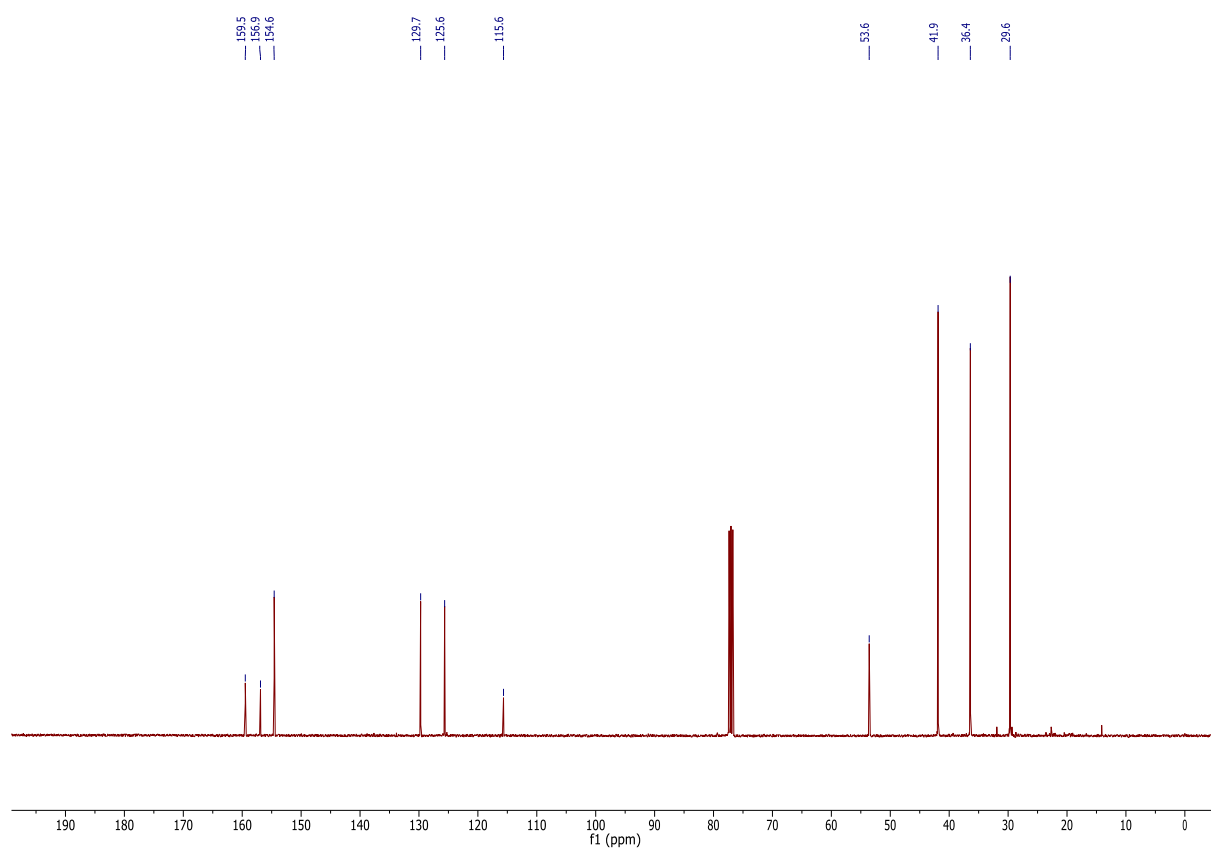

370

371

## 4-(6-phenylthieno[3,2-d]pyrimidin-4-yl)morpholine (14)

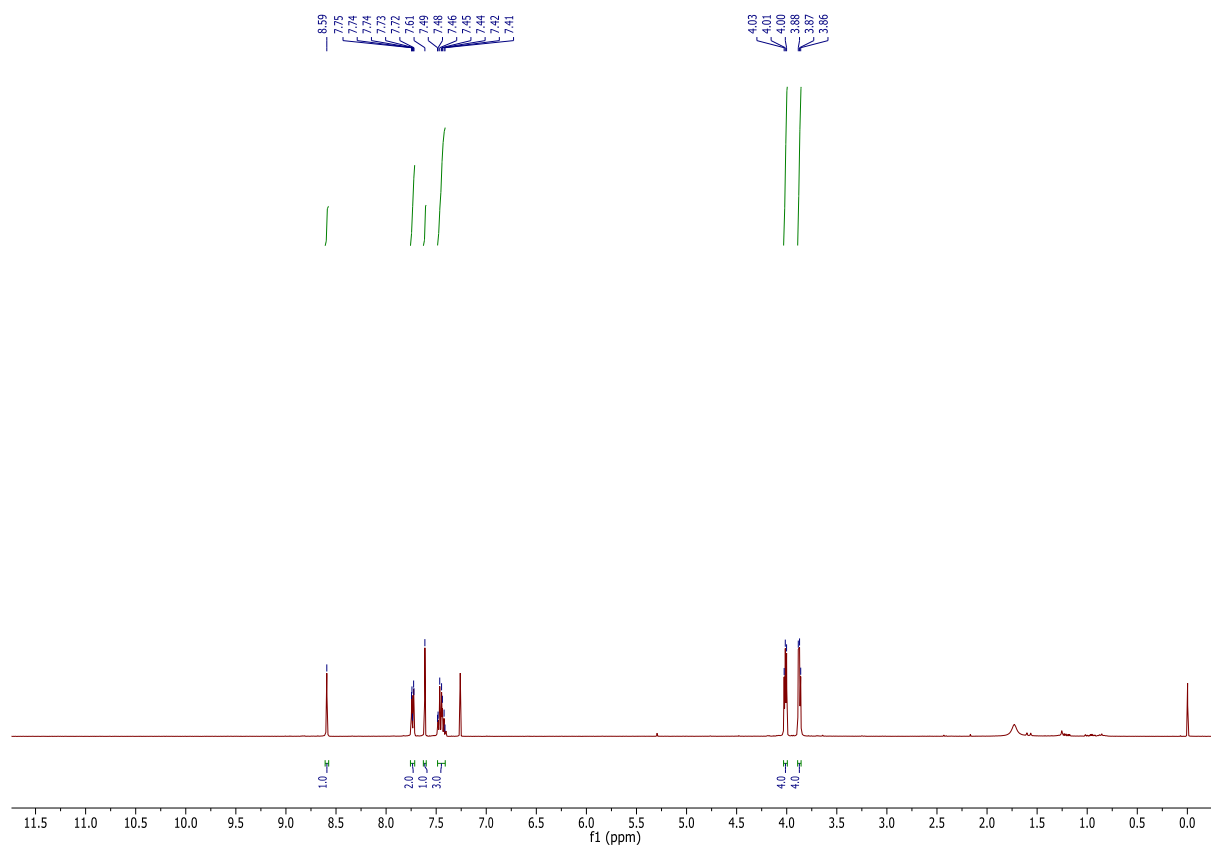

372

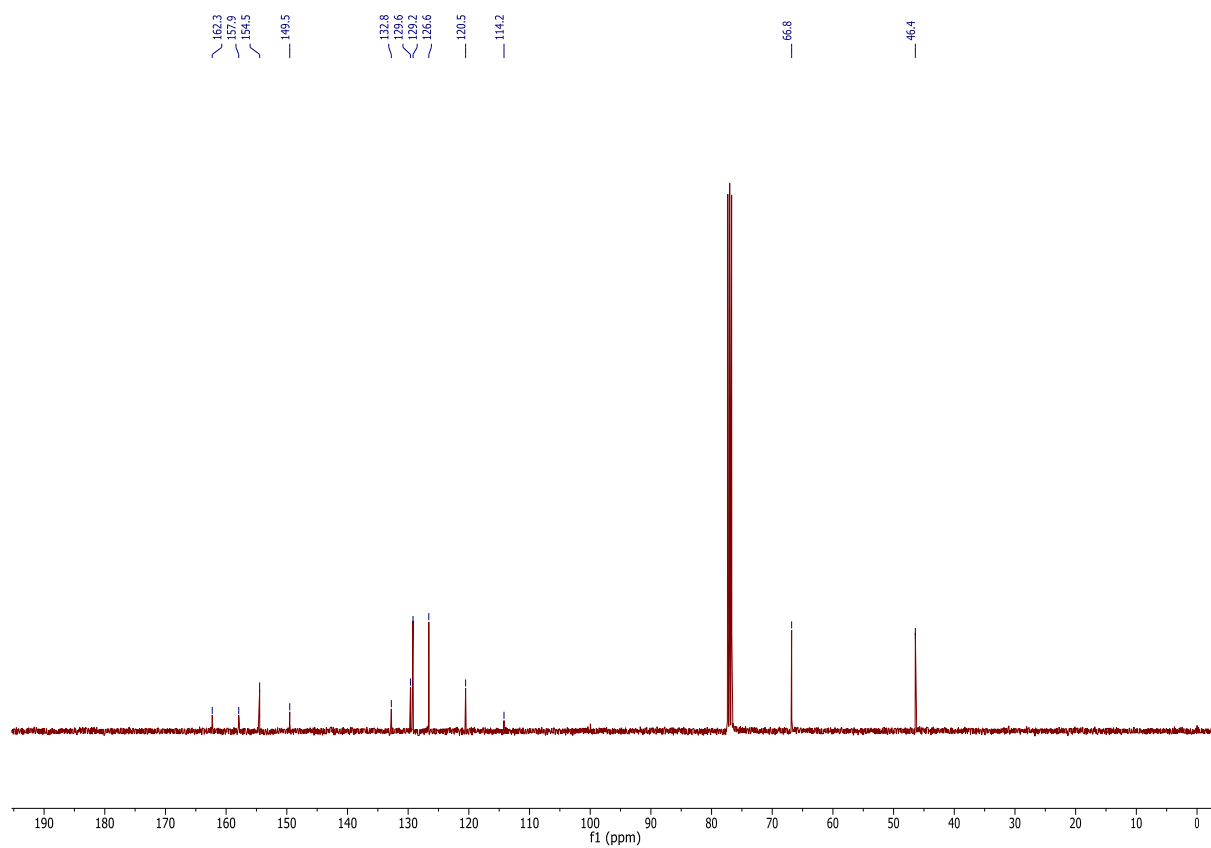

373

374

## 4-(6-(p-tolyl)thieno[3,2-d]pyrimidin-4-yl)morpholine (16)

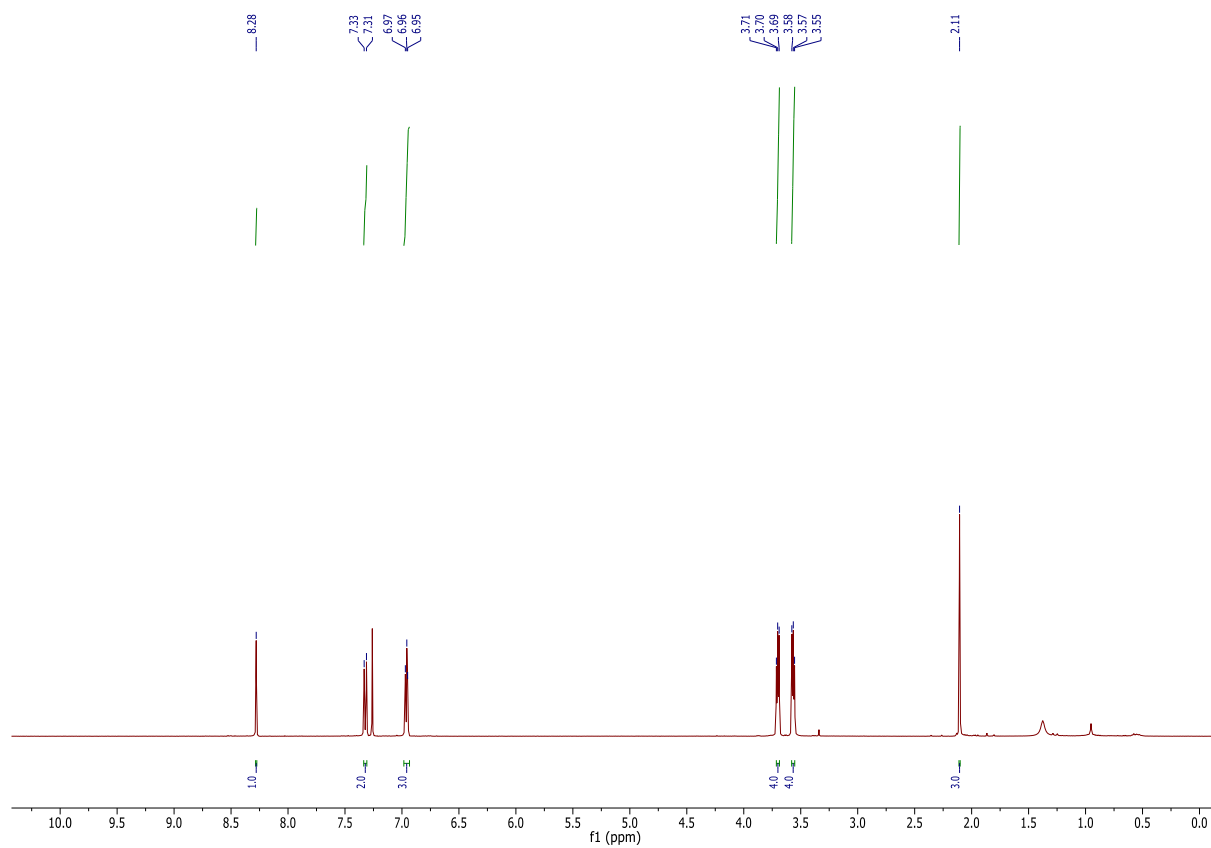

375

376

377

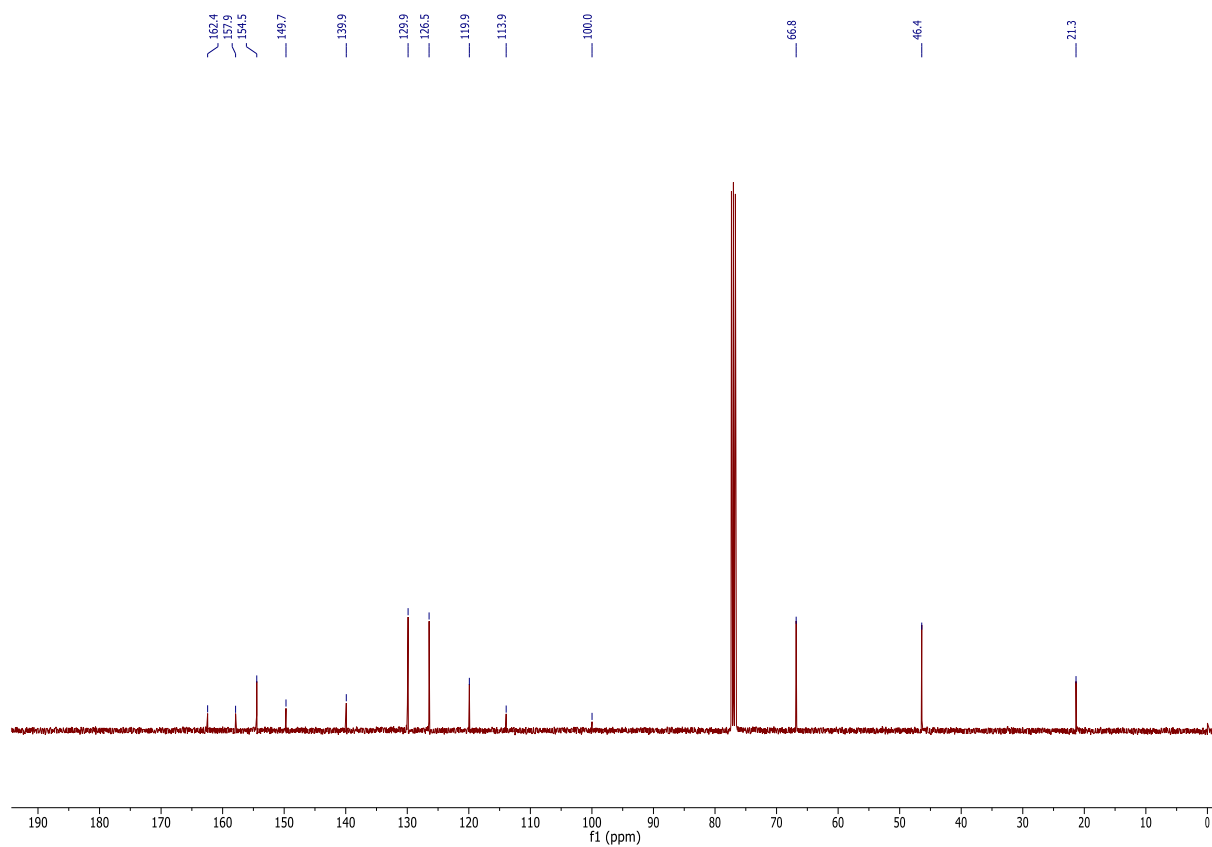

378

## 4-(6-(3,4,5-trimethoxyphenyl)thieno[3,2-d]pyrimidin-4-yl)morpholine (17)

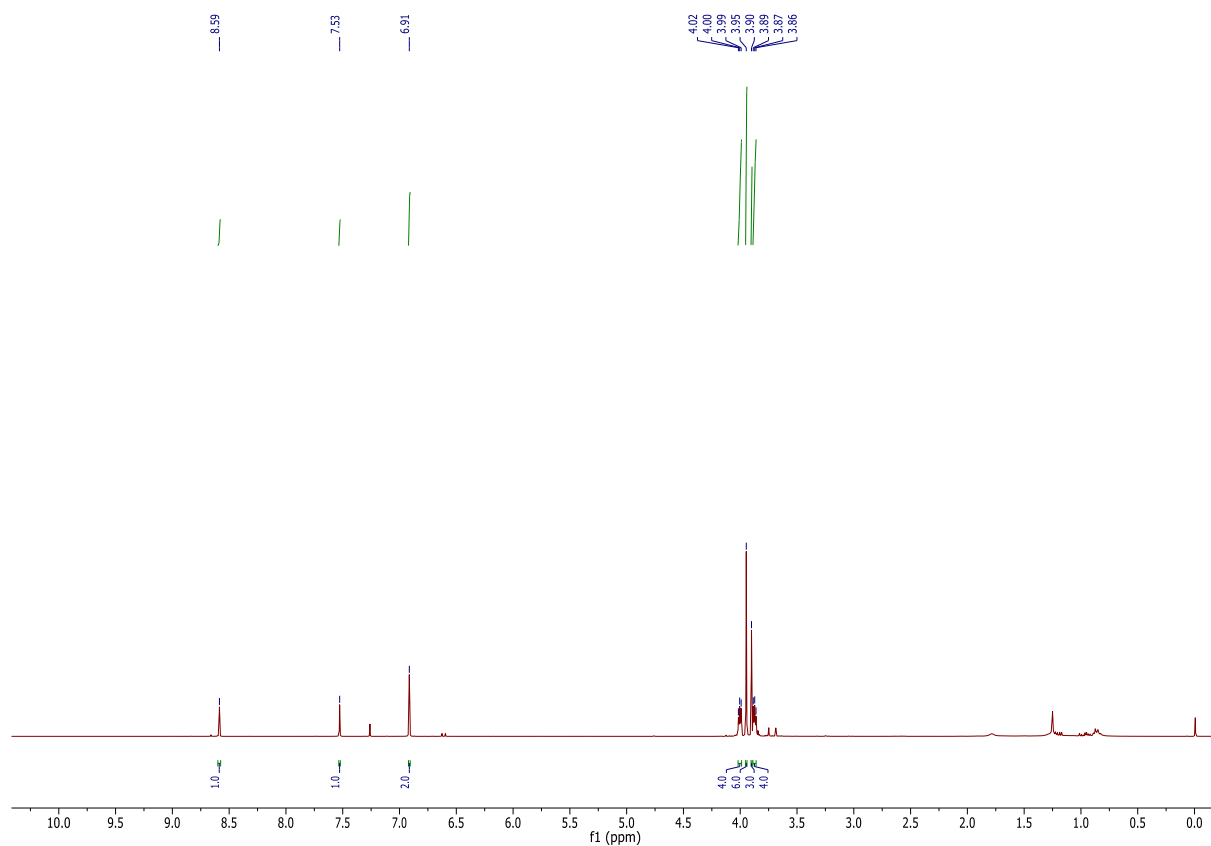

379

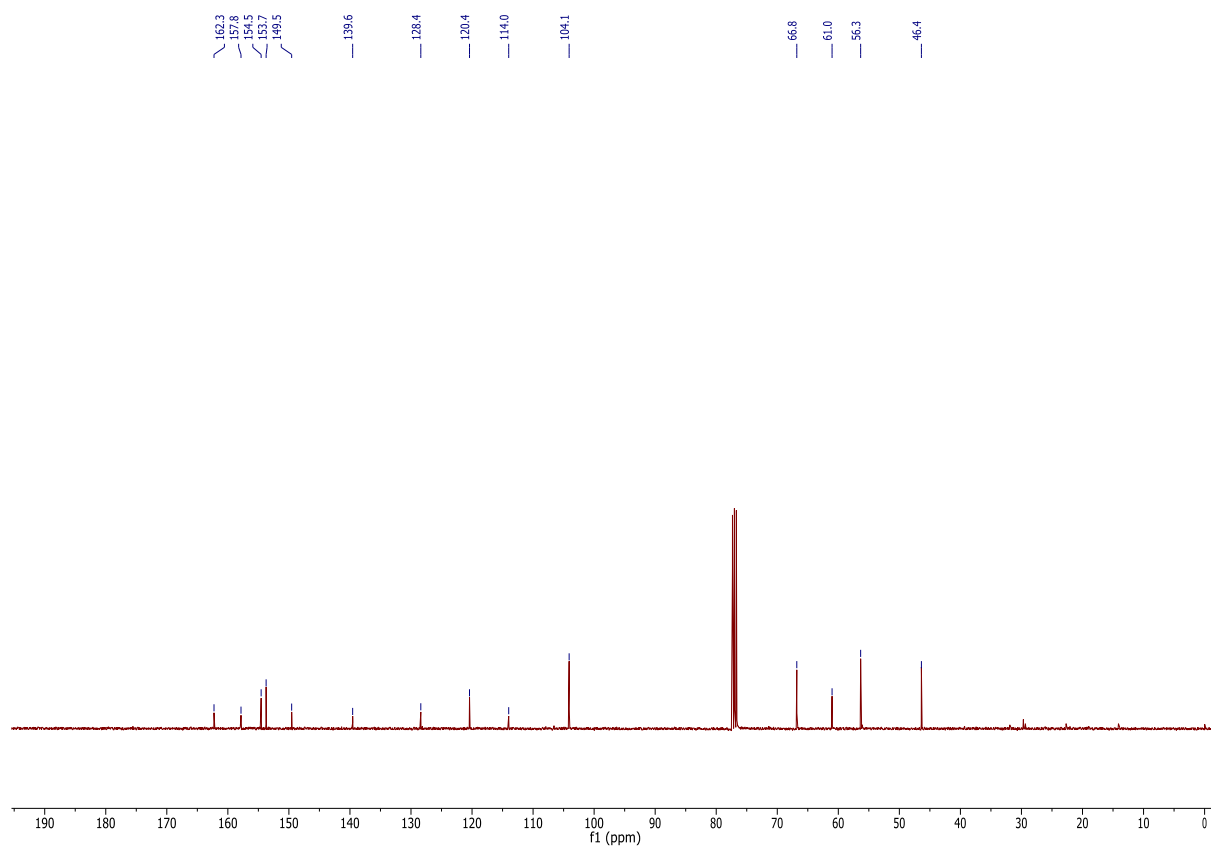

380

381

## methyl 4-(4-morpholinothieno[3,2-d]pyrimidin-6-yl)benzoate (18)

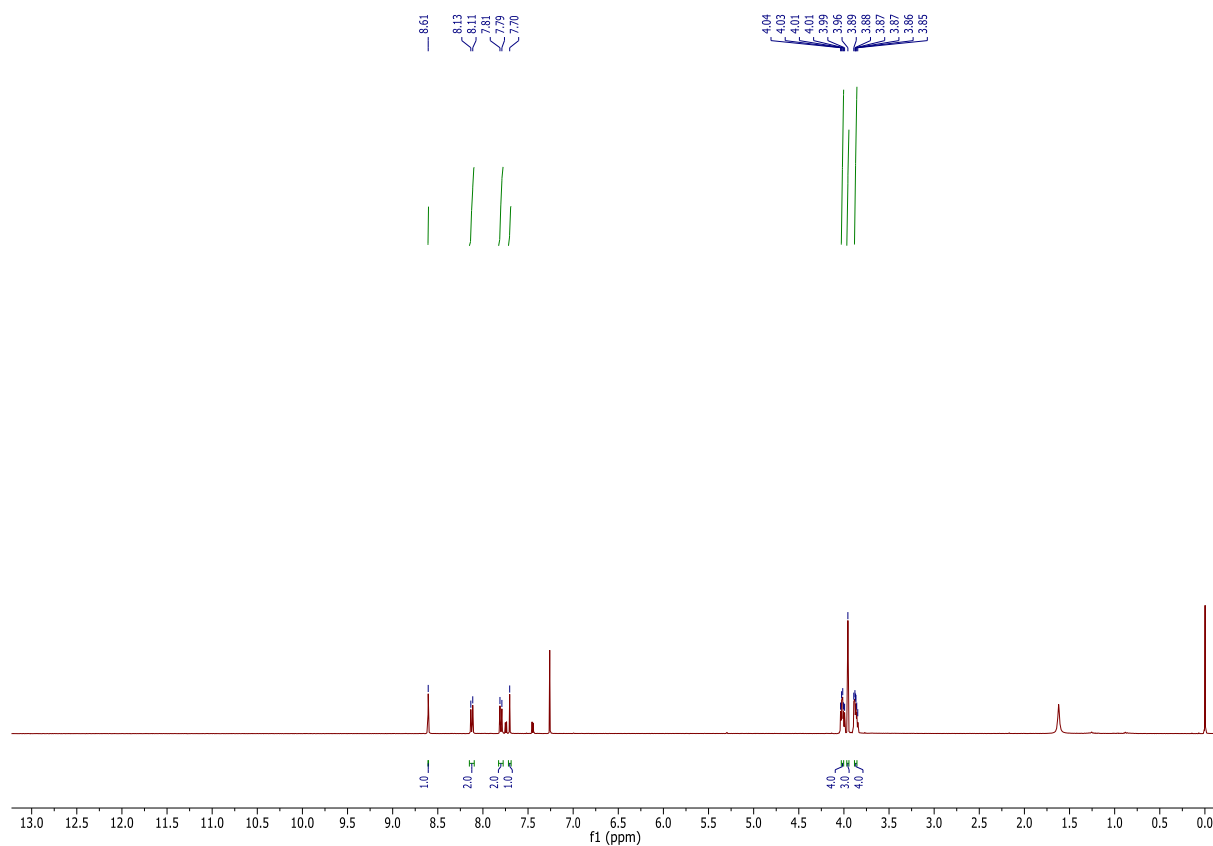

382

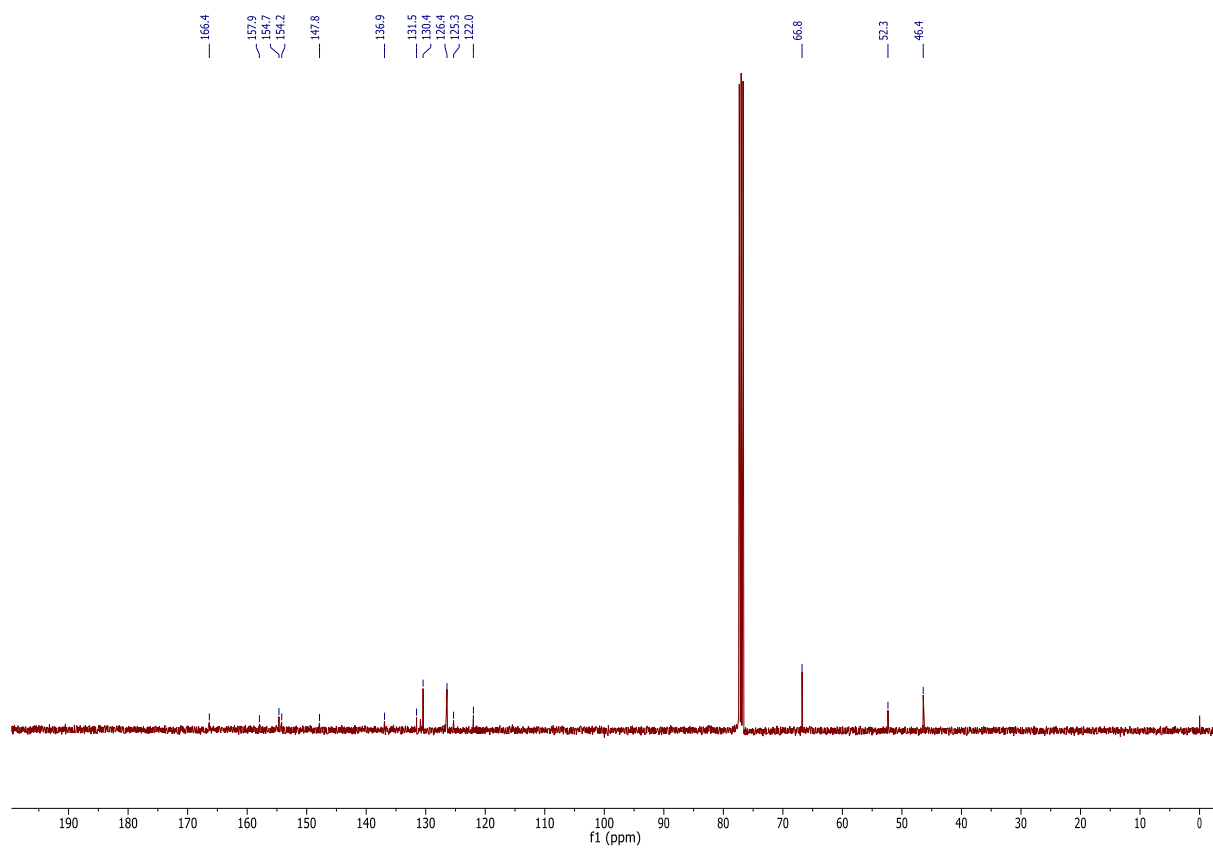

383

384

## 4-(6-(4-ethylphenyl)thieno[3,2-d]pyrimidin-4-yl)morpholine (19)

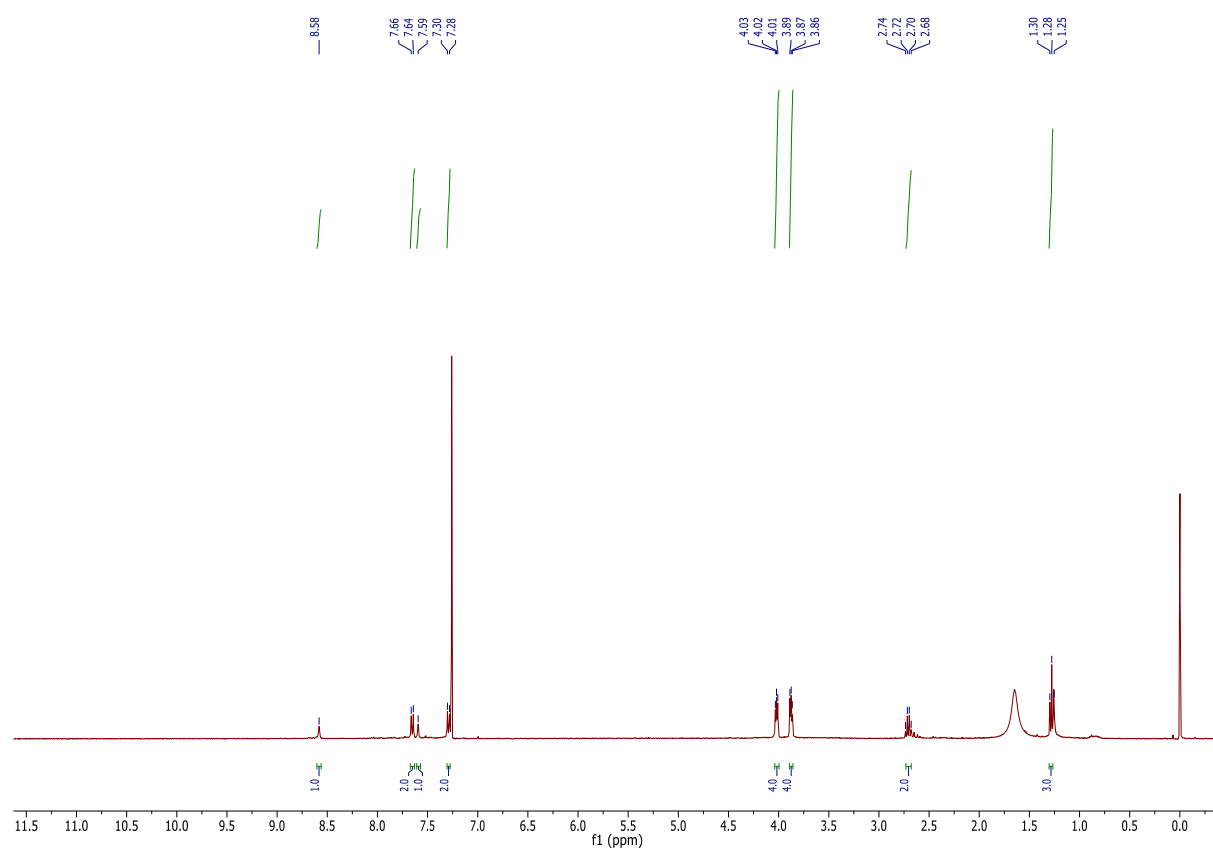

385

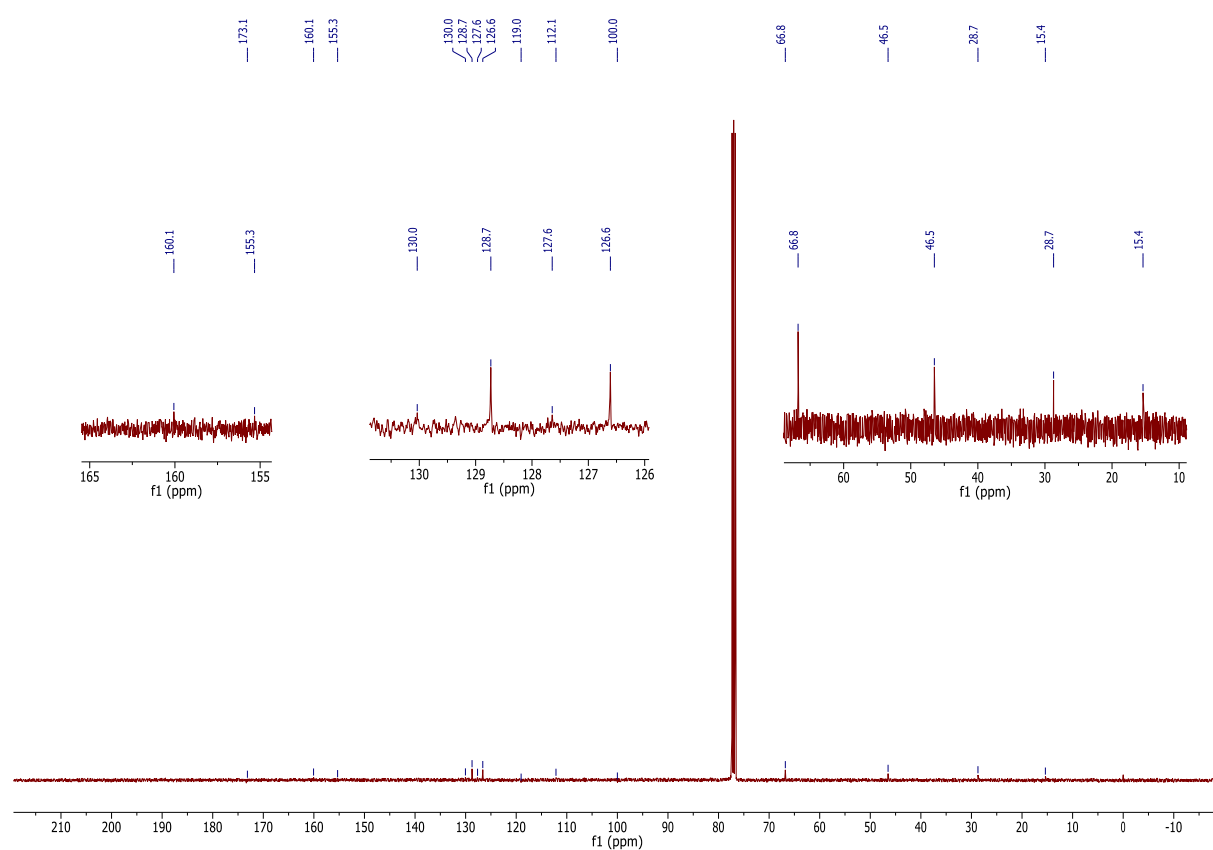

386

387

388

## 4-(6-(benzo[b]thiophen-2-yl)thieno[3,2-d]pyrimidin-4-yl)morpholine (20)

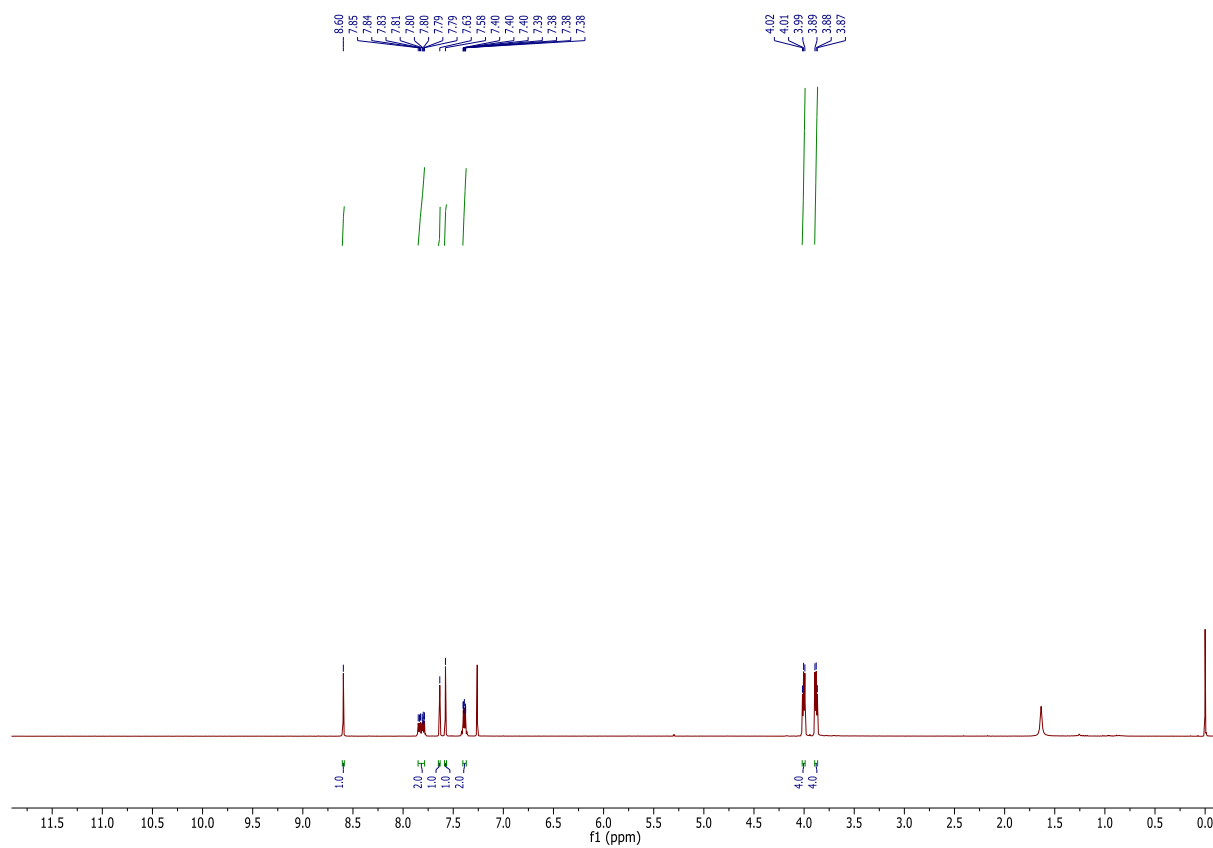

389

390

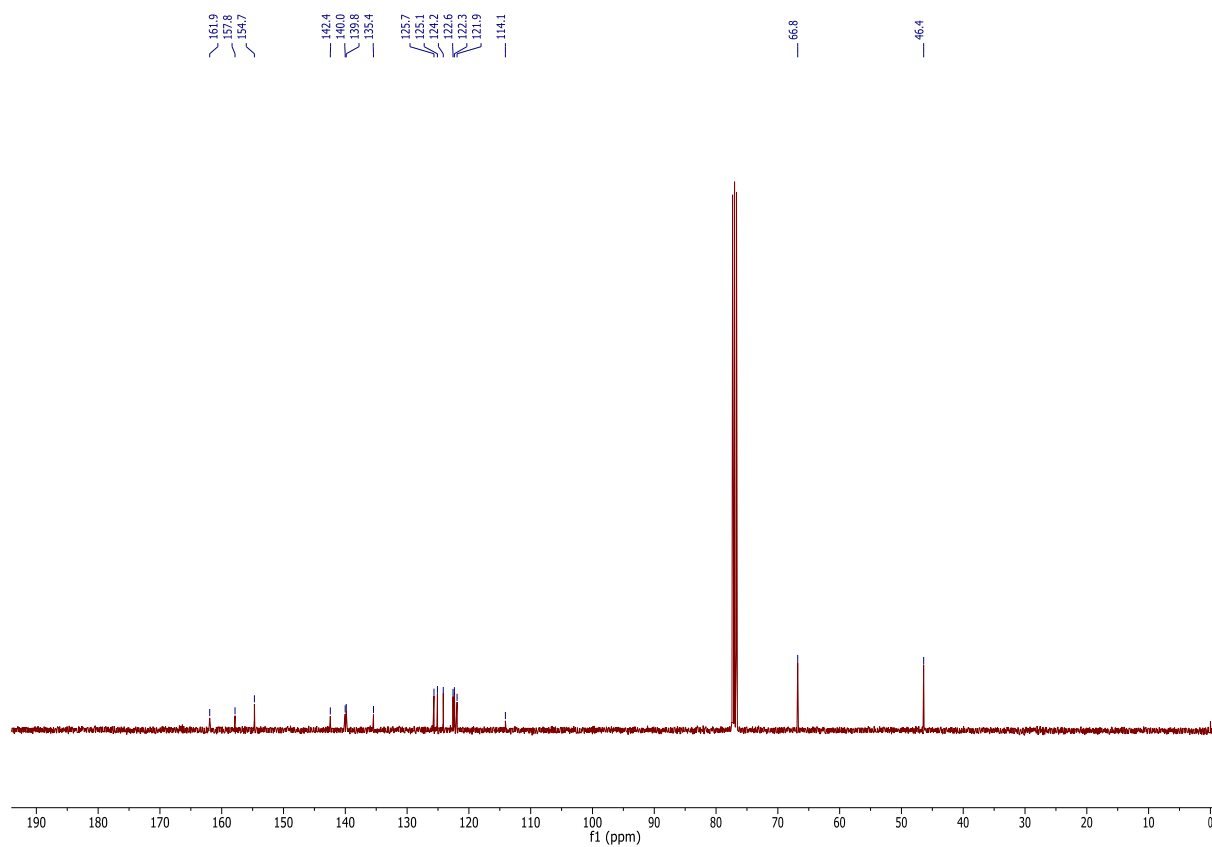

391

## 4-(6-(naphthalen-1-yl)thieno[3,2-d]pyrimidin-4-yl)morpholine (21)

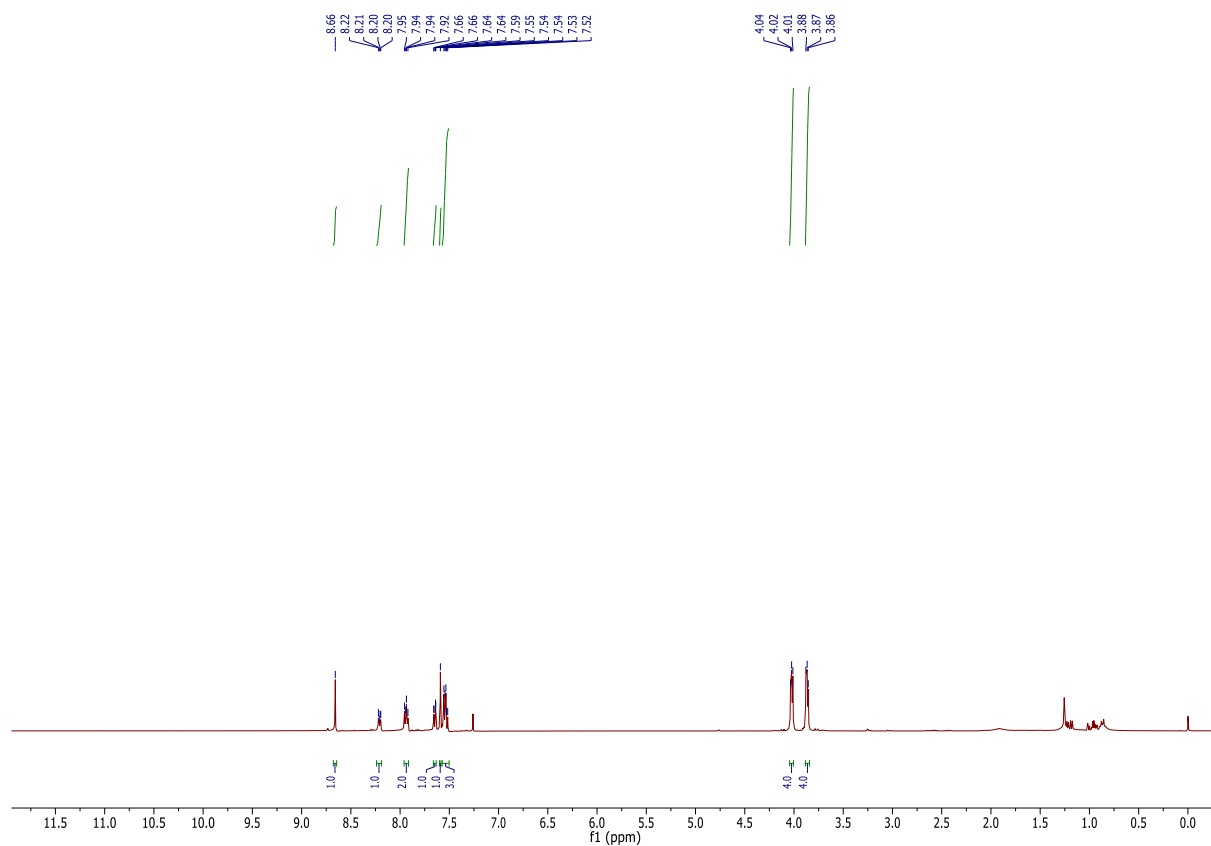

392

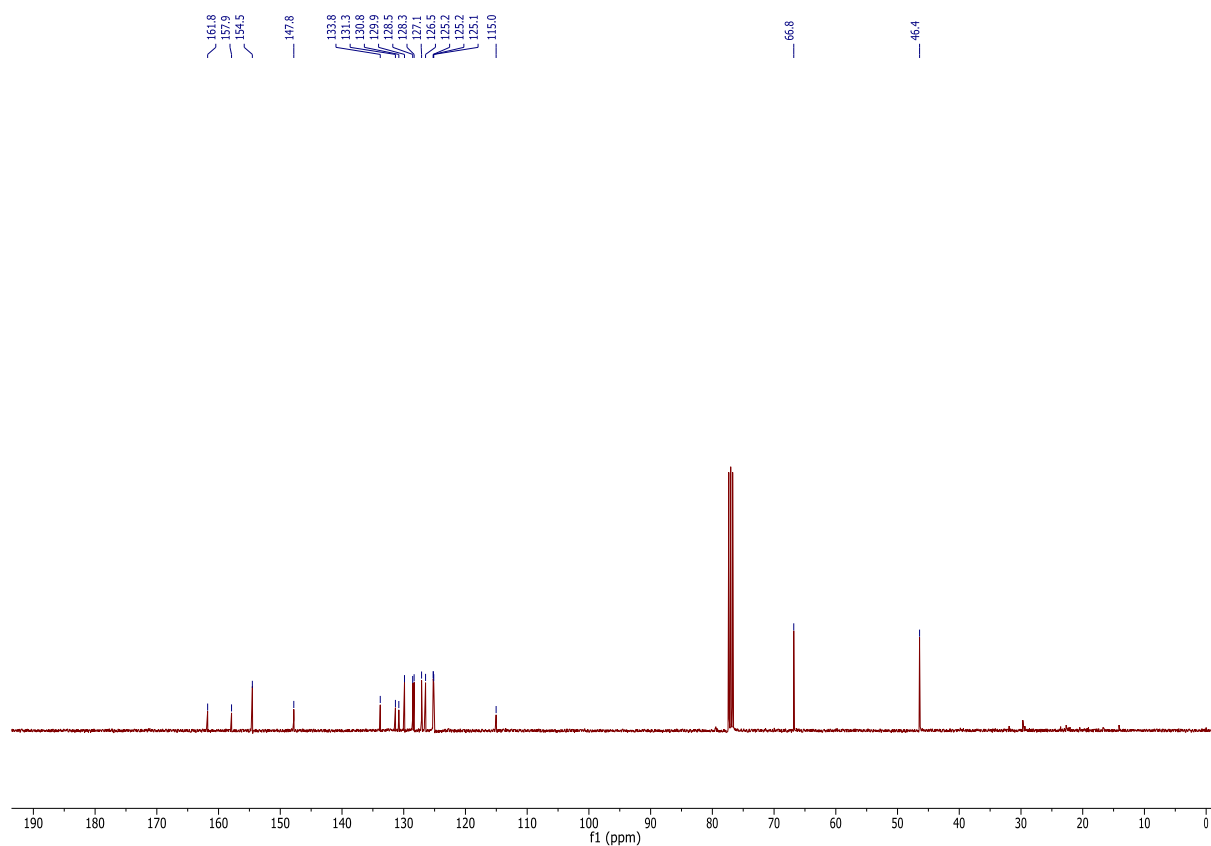

393

394

**4-(4-morpholinothieno[3,2-d]pyrimidin-6-yl)benzonitrile (22)**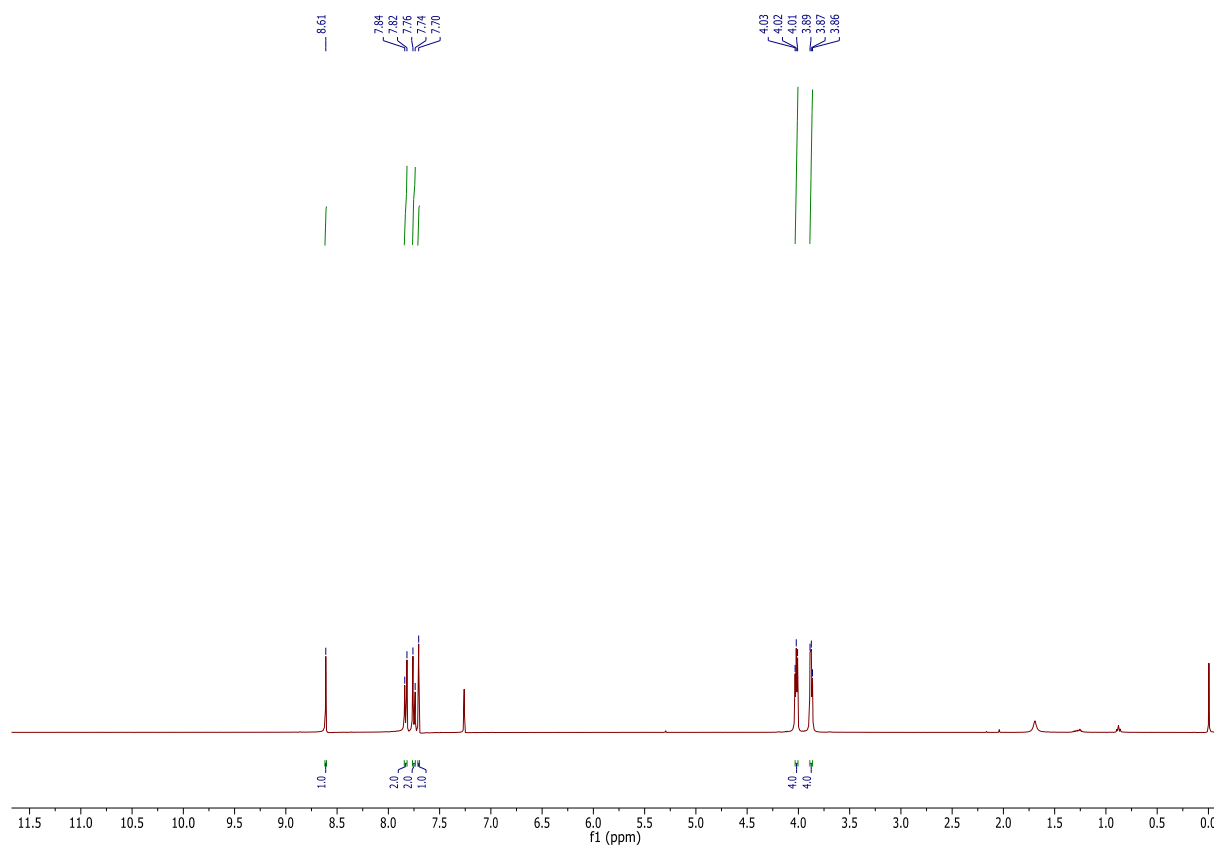

395

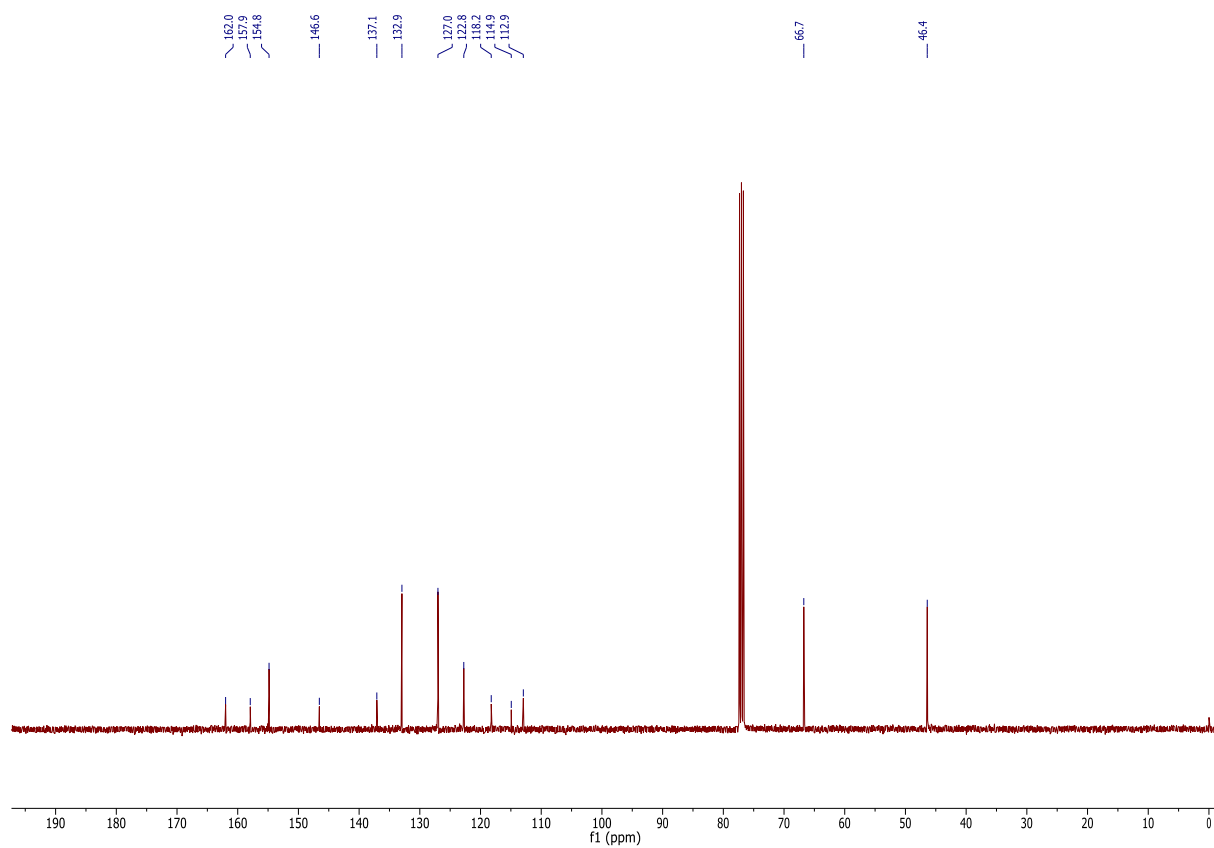

396

397

## N-((3s,5s,7s)-adamantan-1-yl)-6-phenylthieno[3,2-d]pyrimidin-4-amine (23)

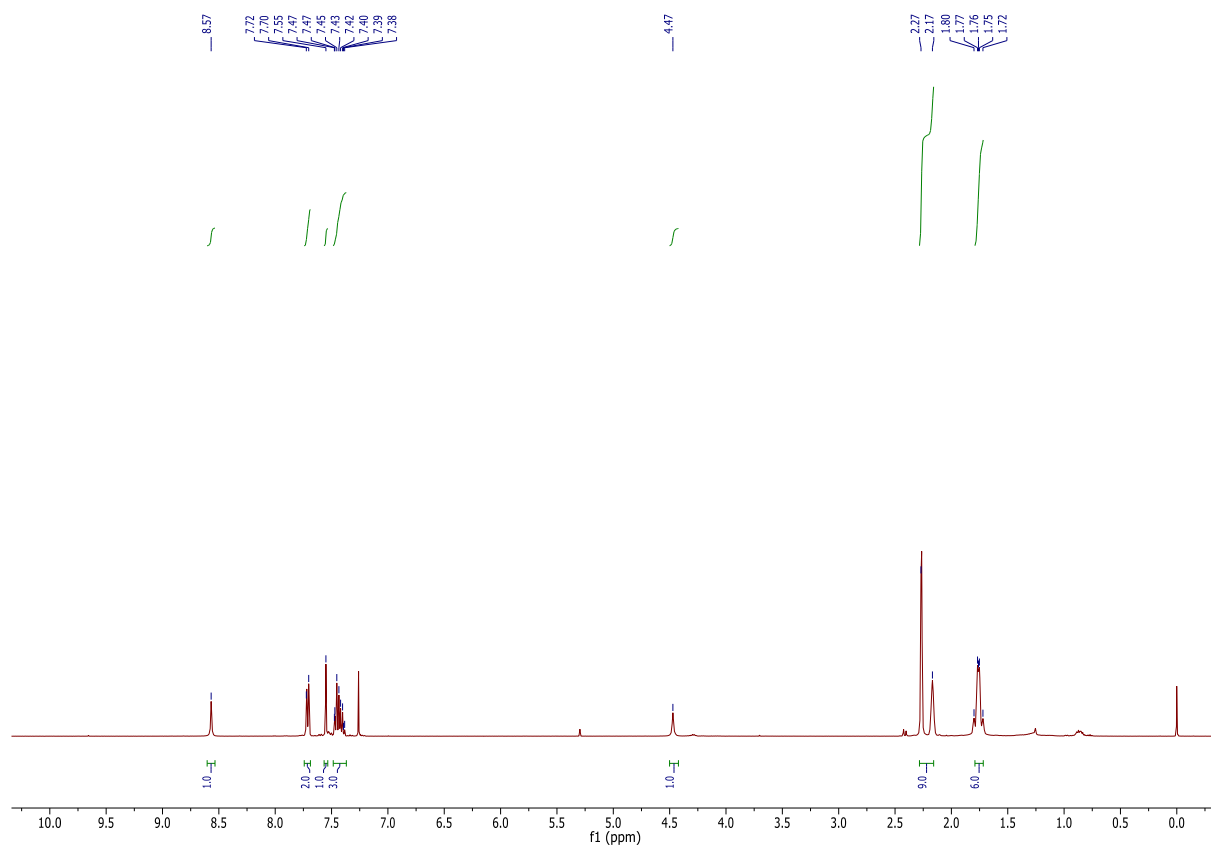

398

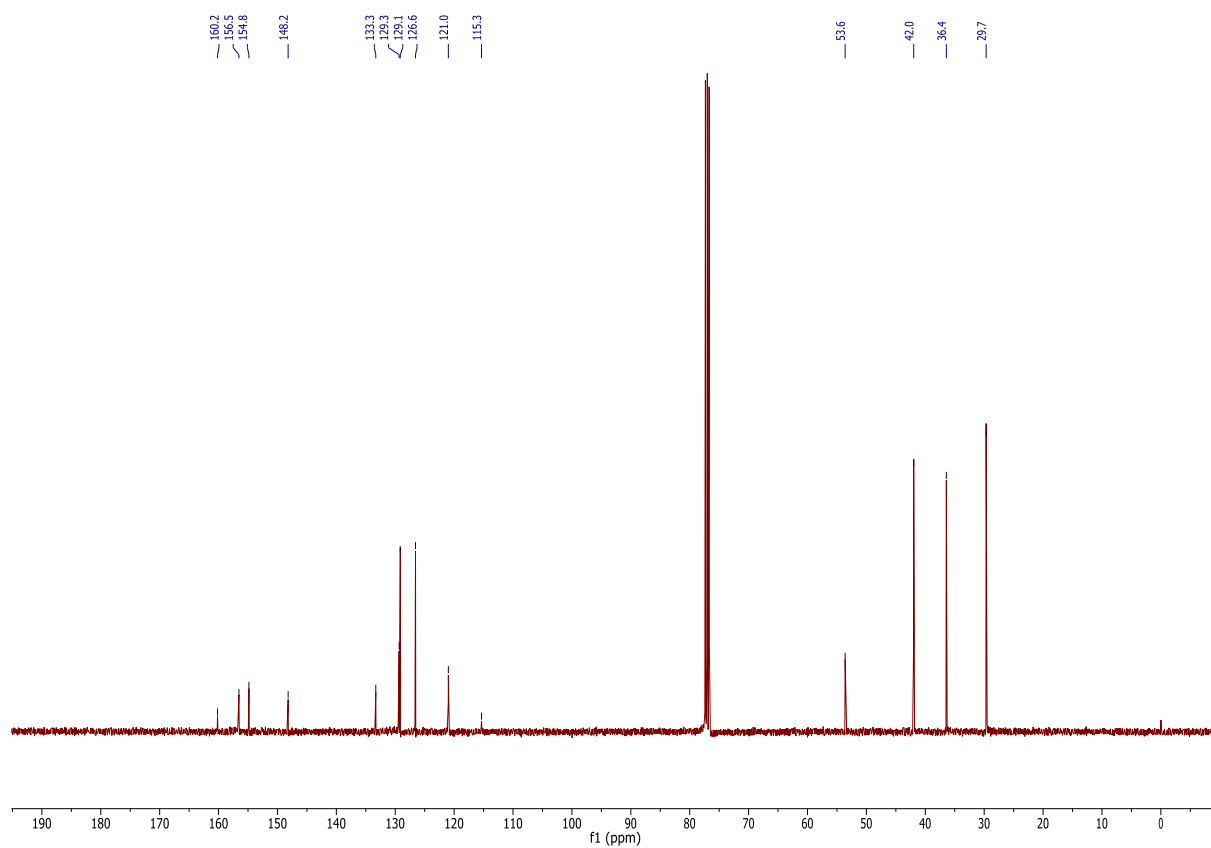

399

400

**4-(6,7-diphenylthieno[3,2-d]pyrimidin-4-yl)morpholine (15)**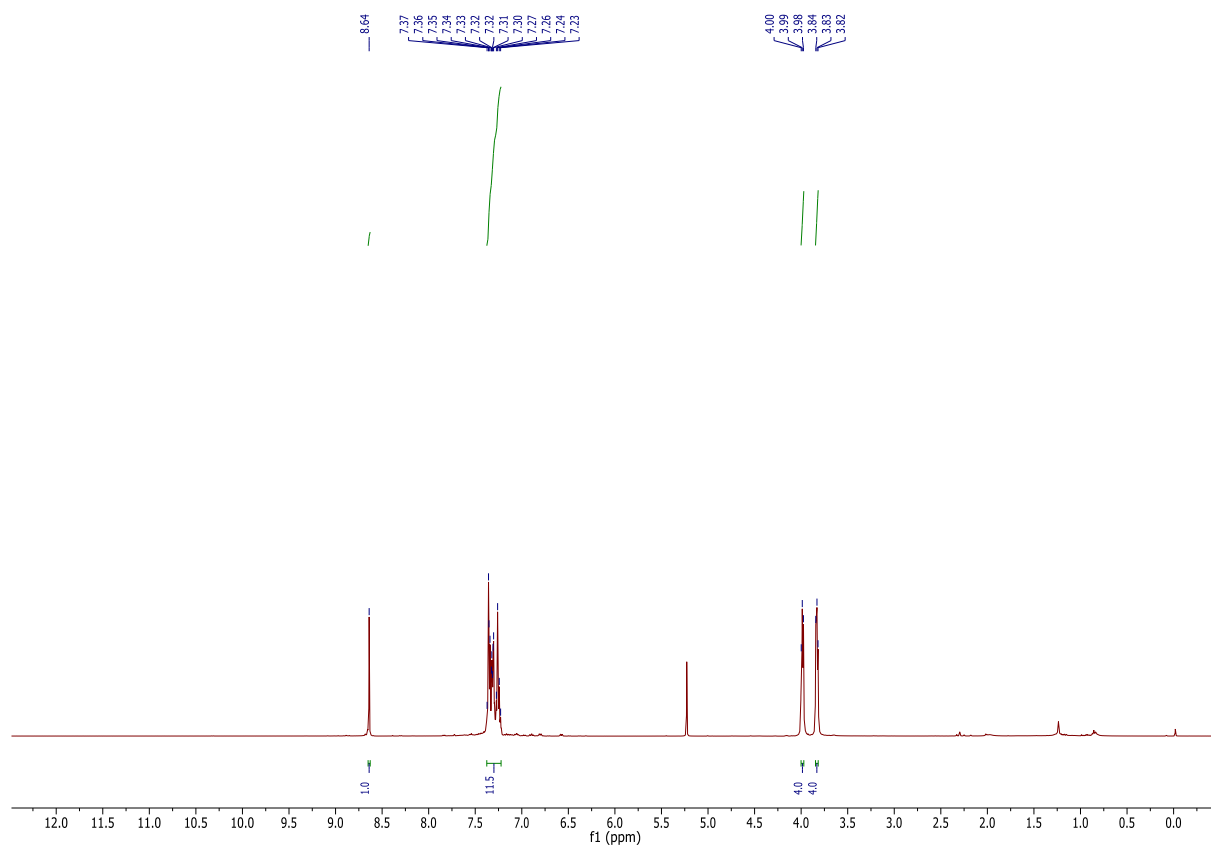

401

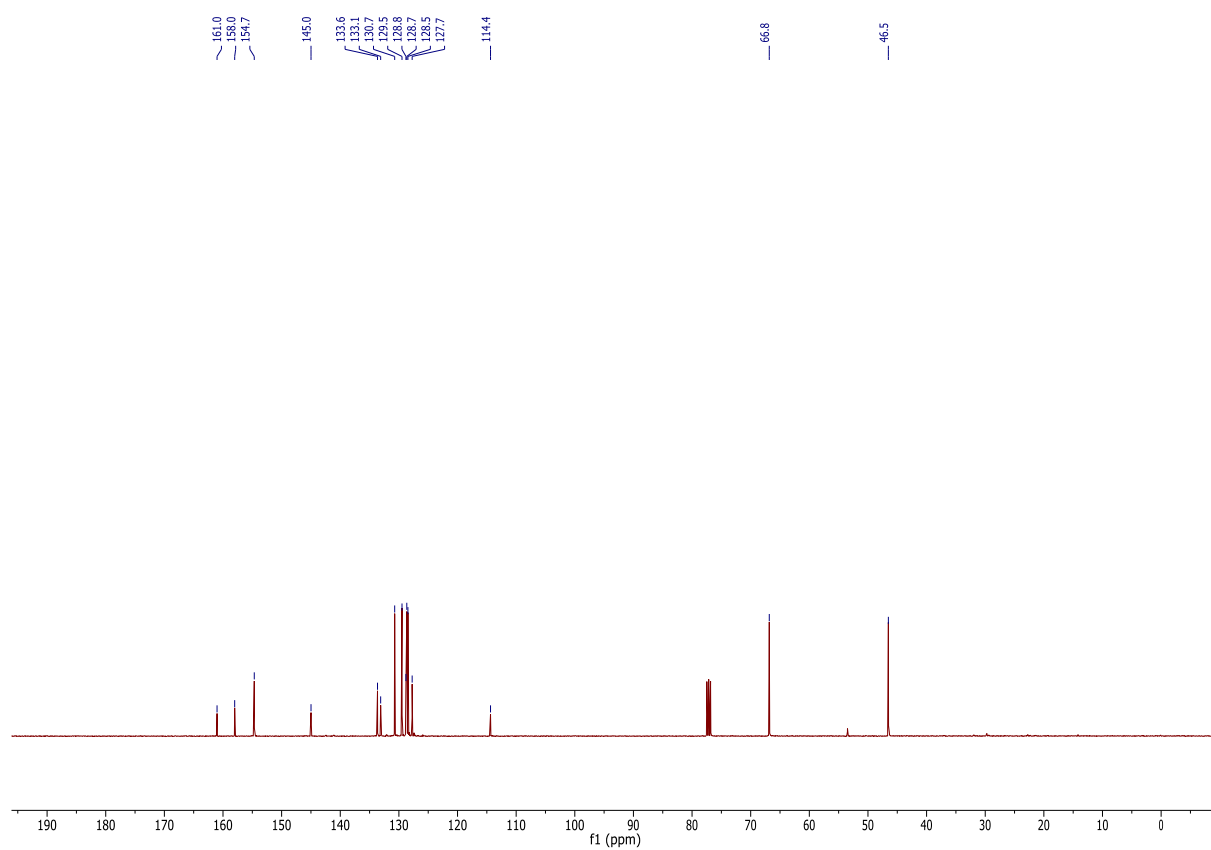

402

403

404

**4-(4-morpholino-6-phenylthieno[3,2-d]pyrimidin-7-yl)benzonitrile (24)**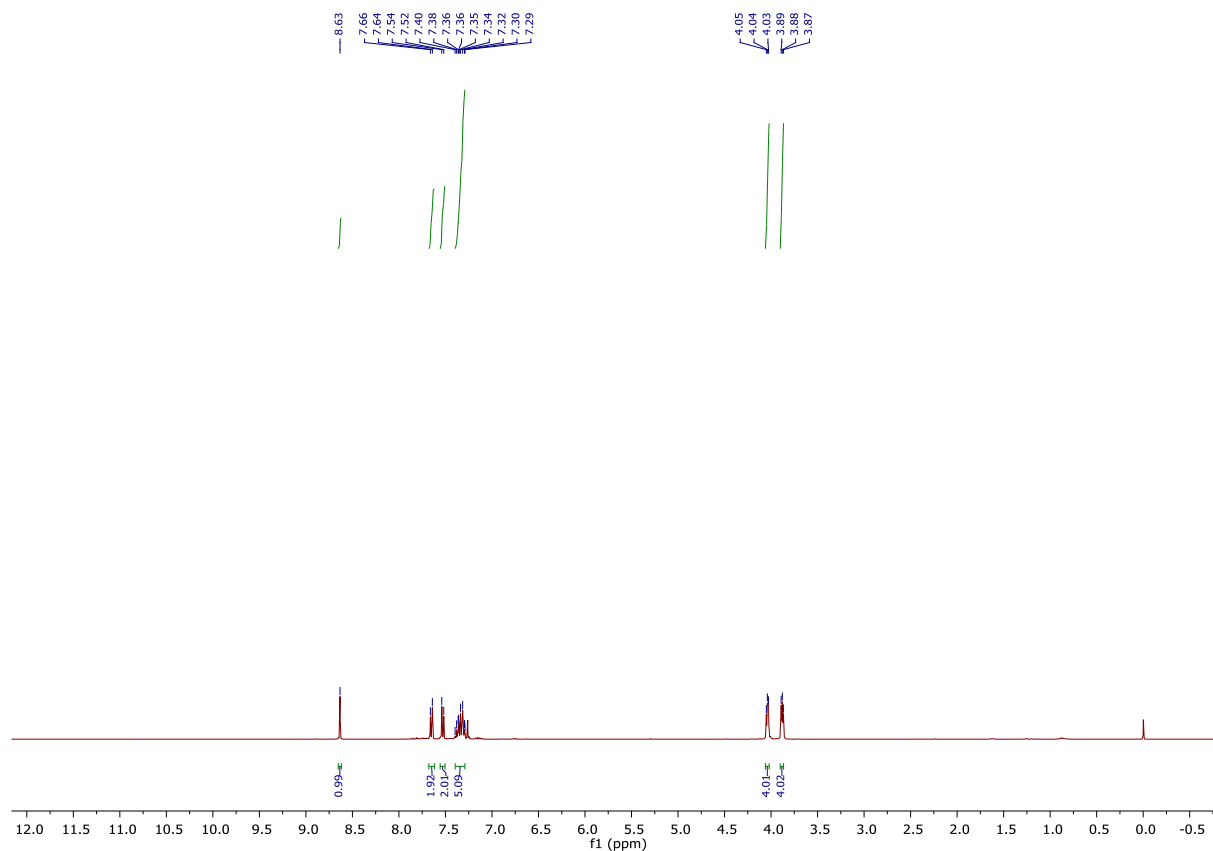

405

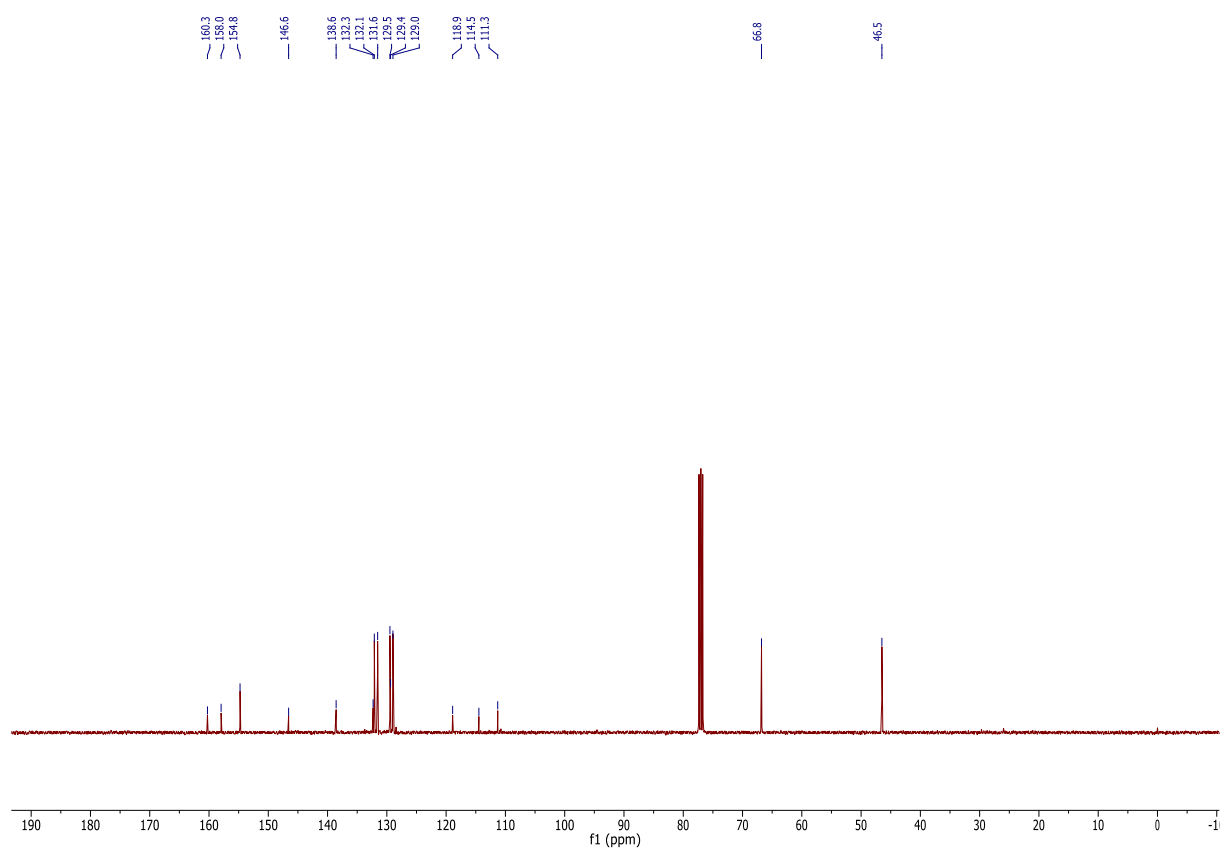

406

407

## 2,3-diphenylthieno[3,2-b]pyridine (25)

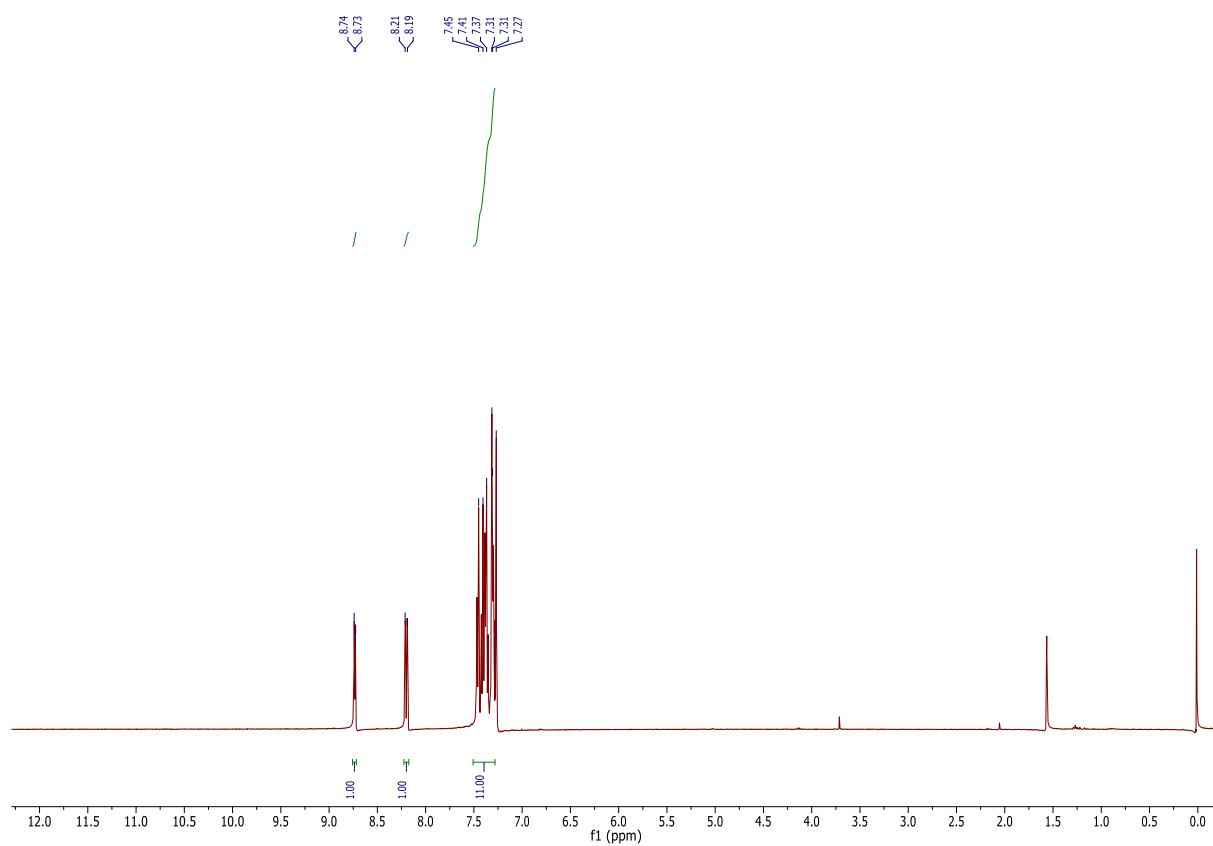

408

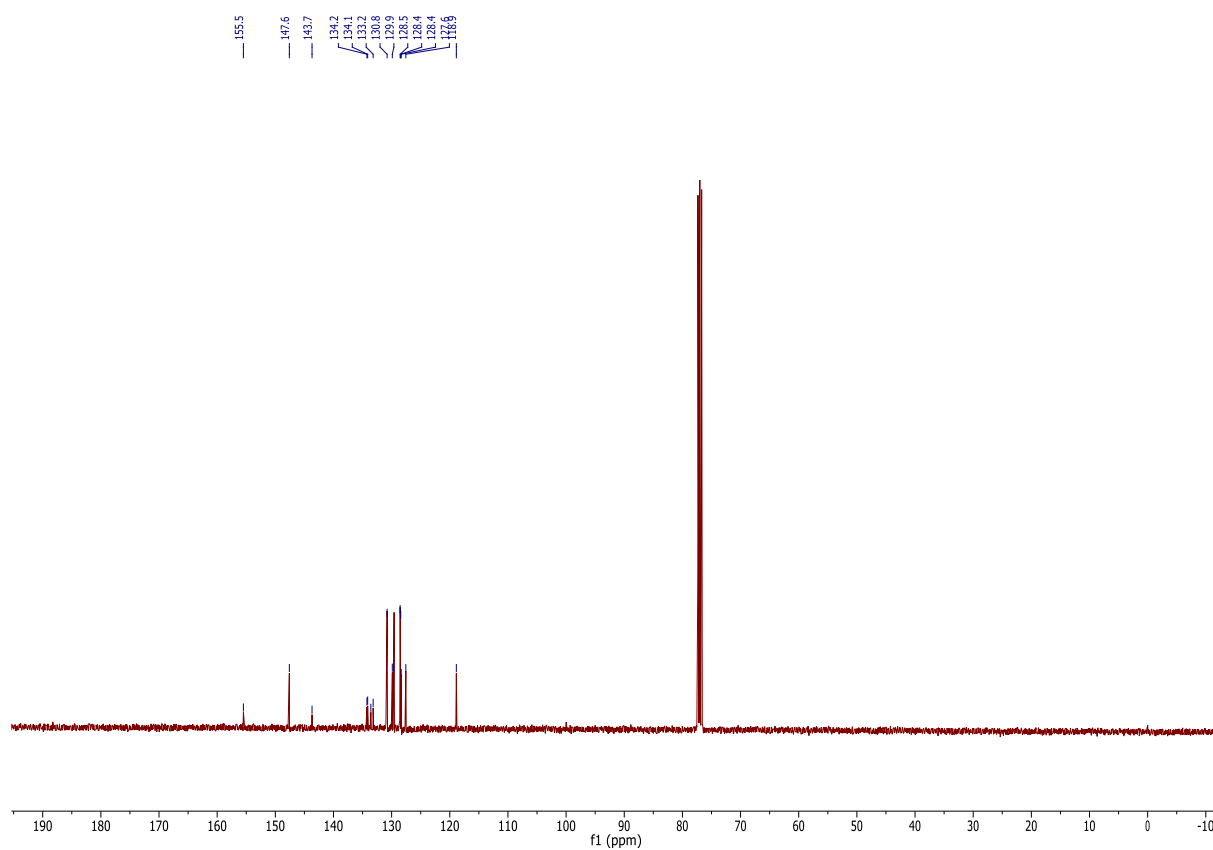

409

410

**2-phenyl-3-(p-tolyl)thieno[3,2-b]pyridine (26)**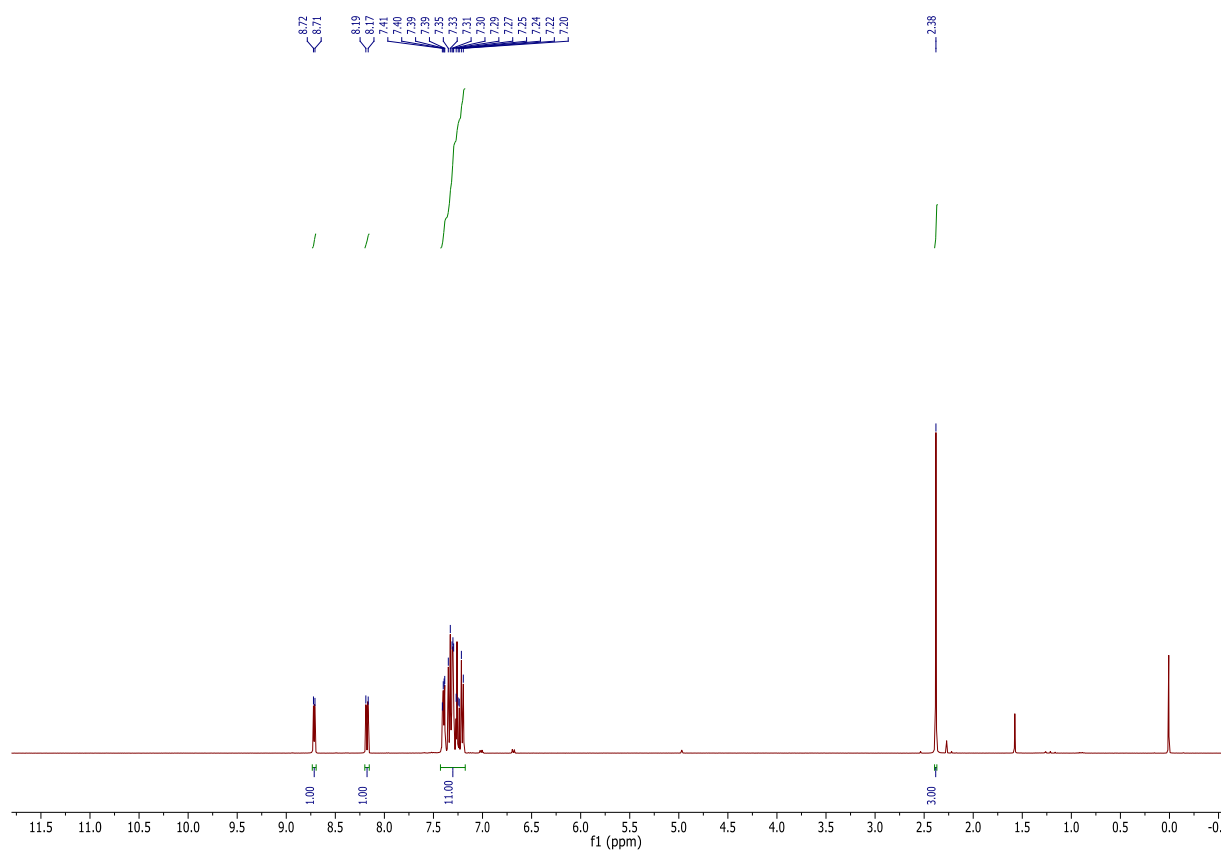

411

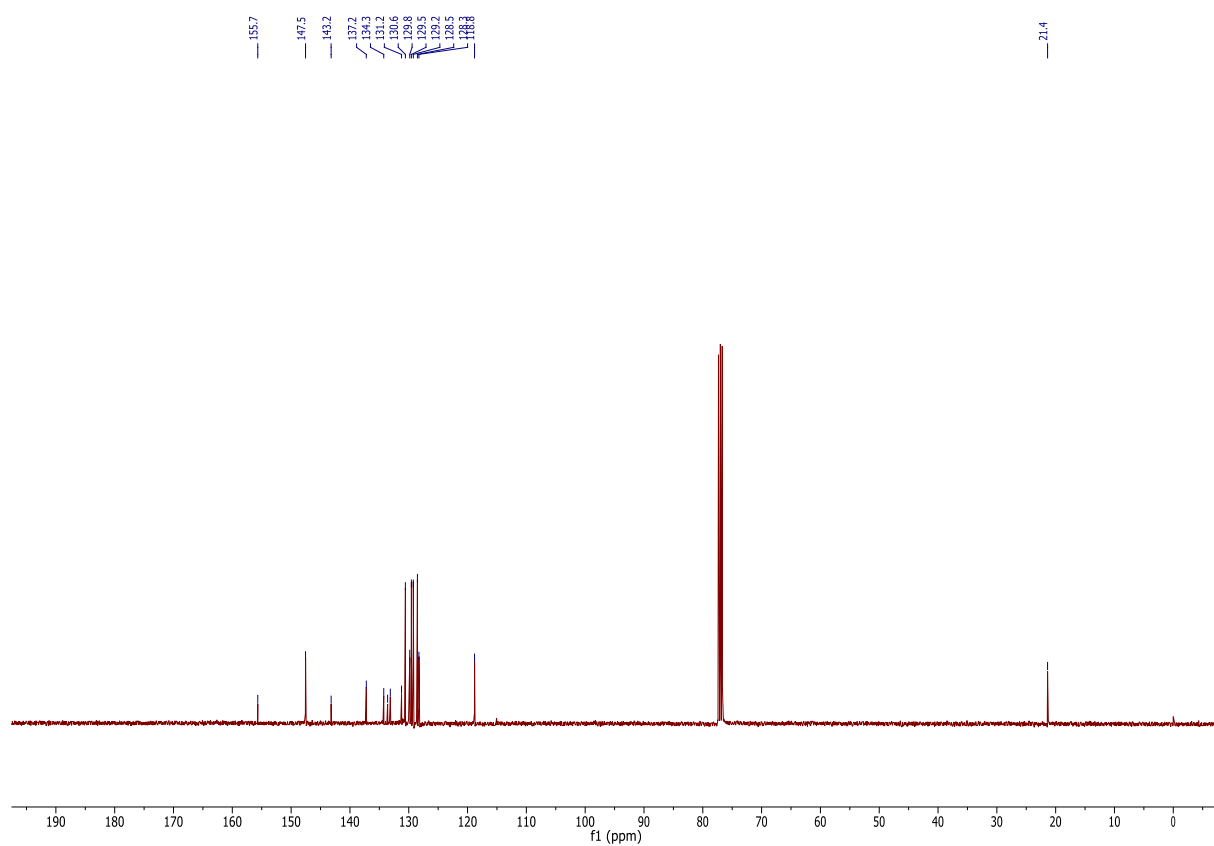

412

413

414

**methyl 4-(2-phenylthieno[3,2-b]pyridin-3-yl)benzoate (27)**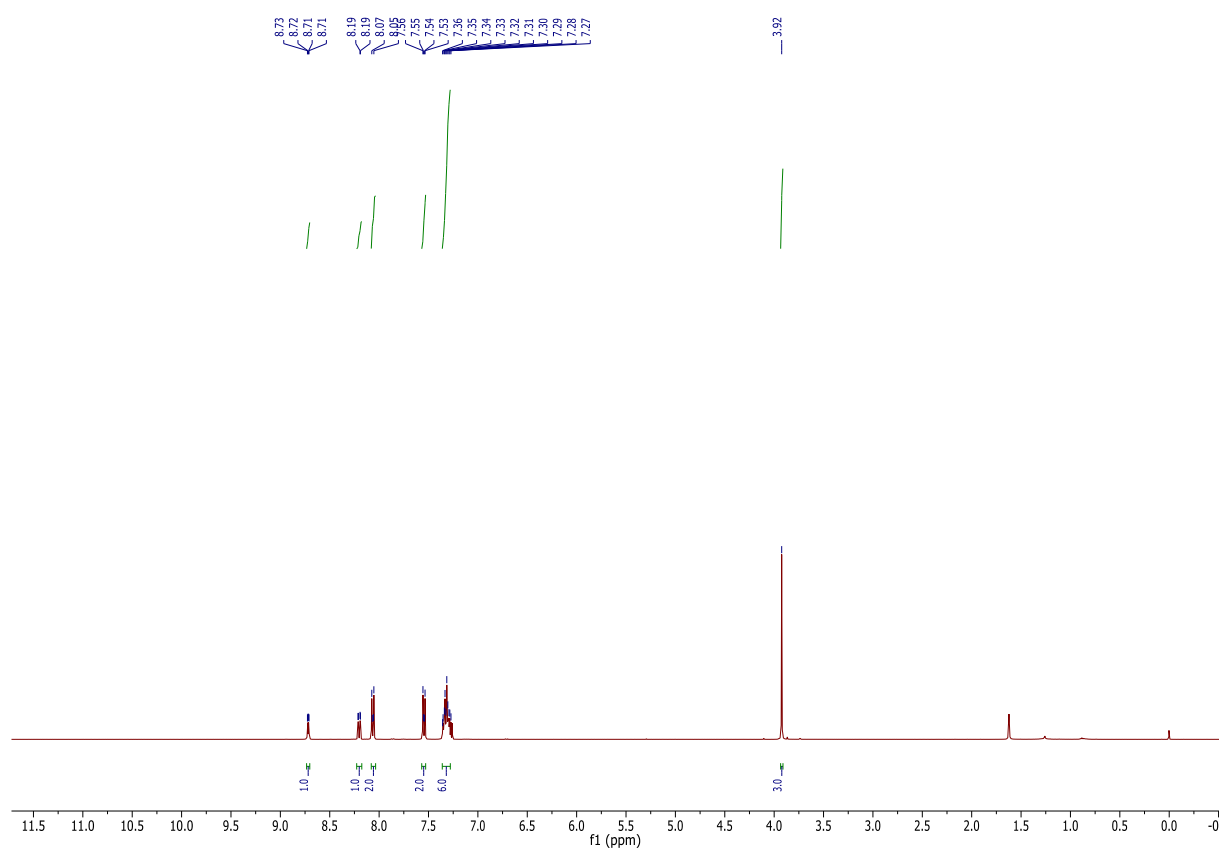

415

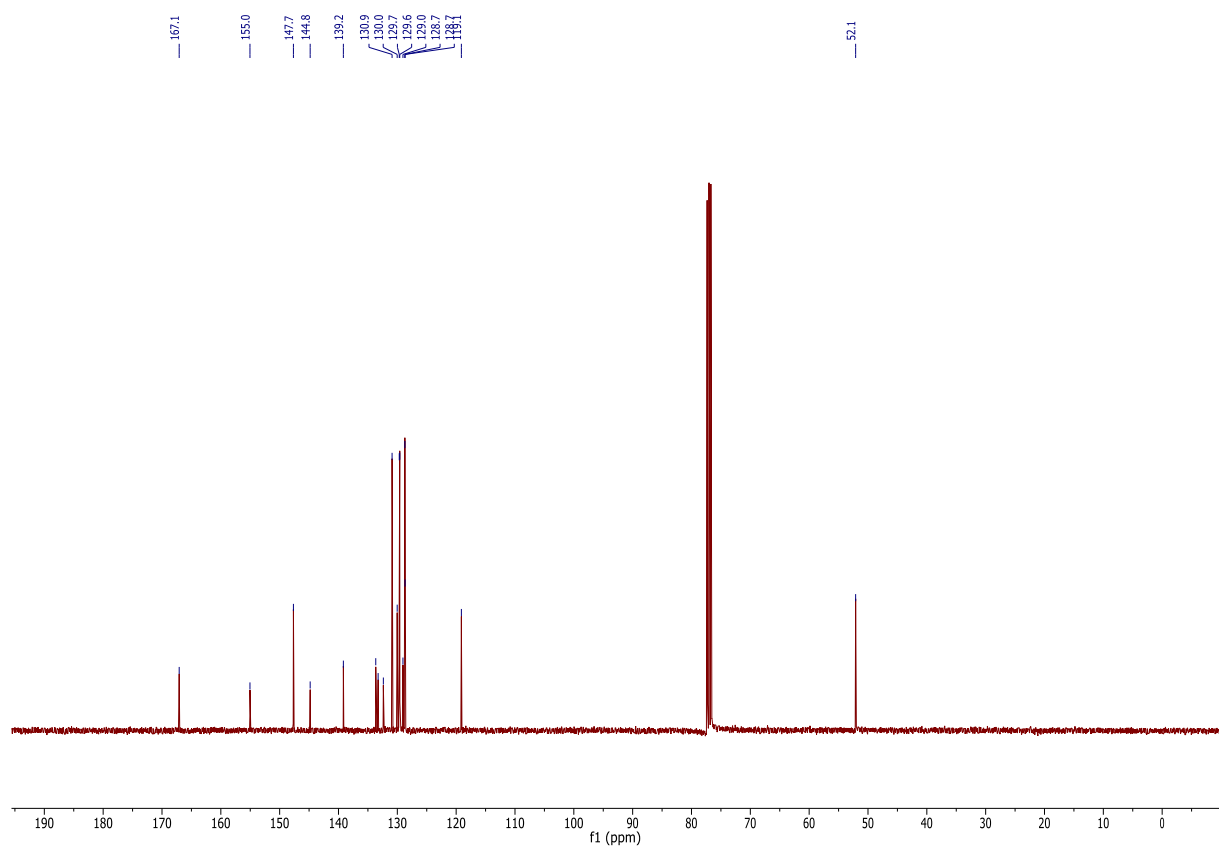

416

417

**3-(4-ethylphenyl)-2-phenylthieno[3,2-b]pyridine (28)**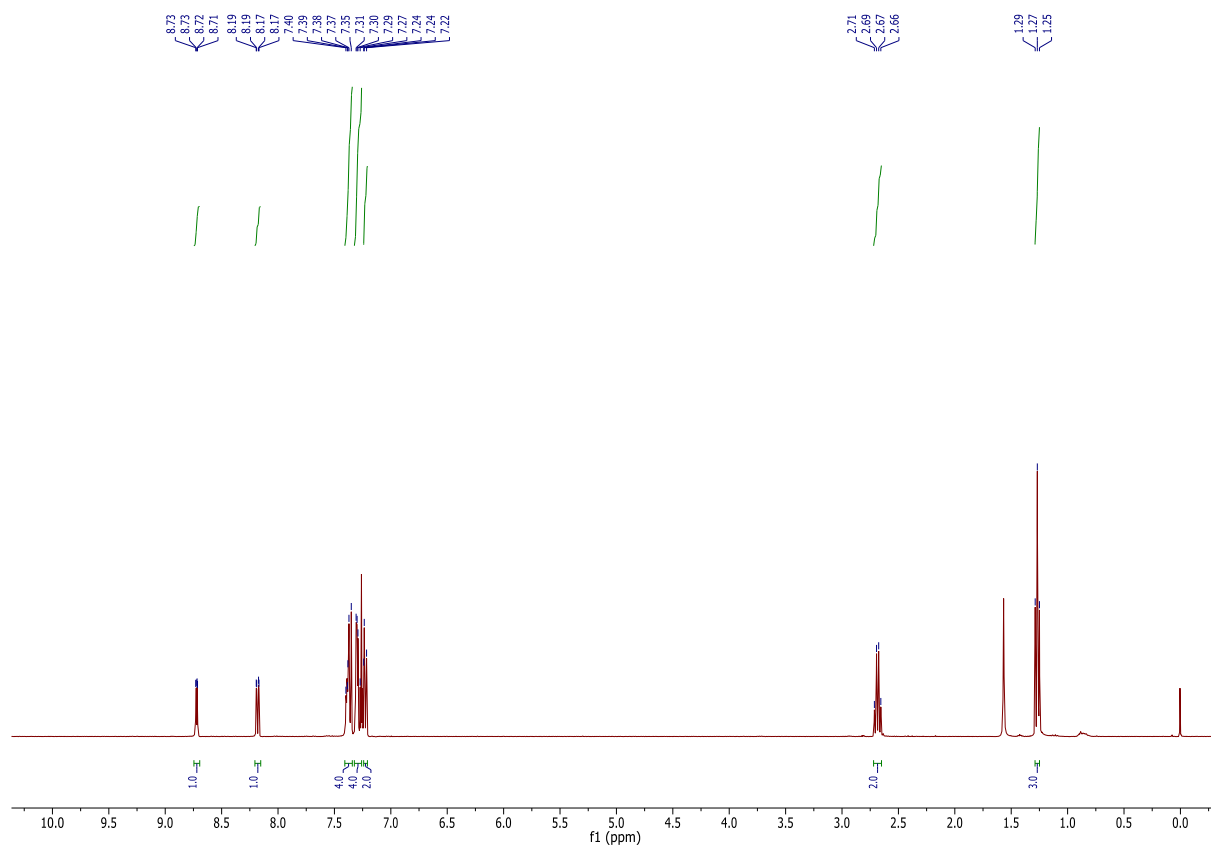

418

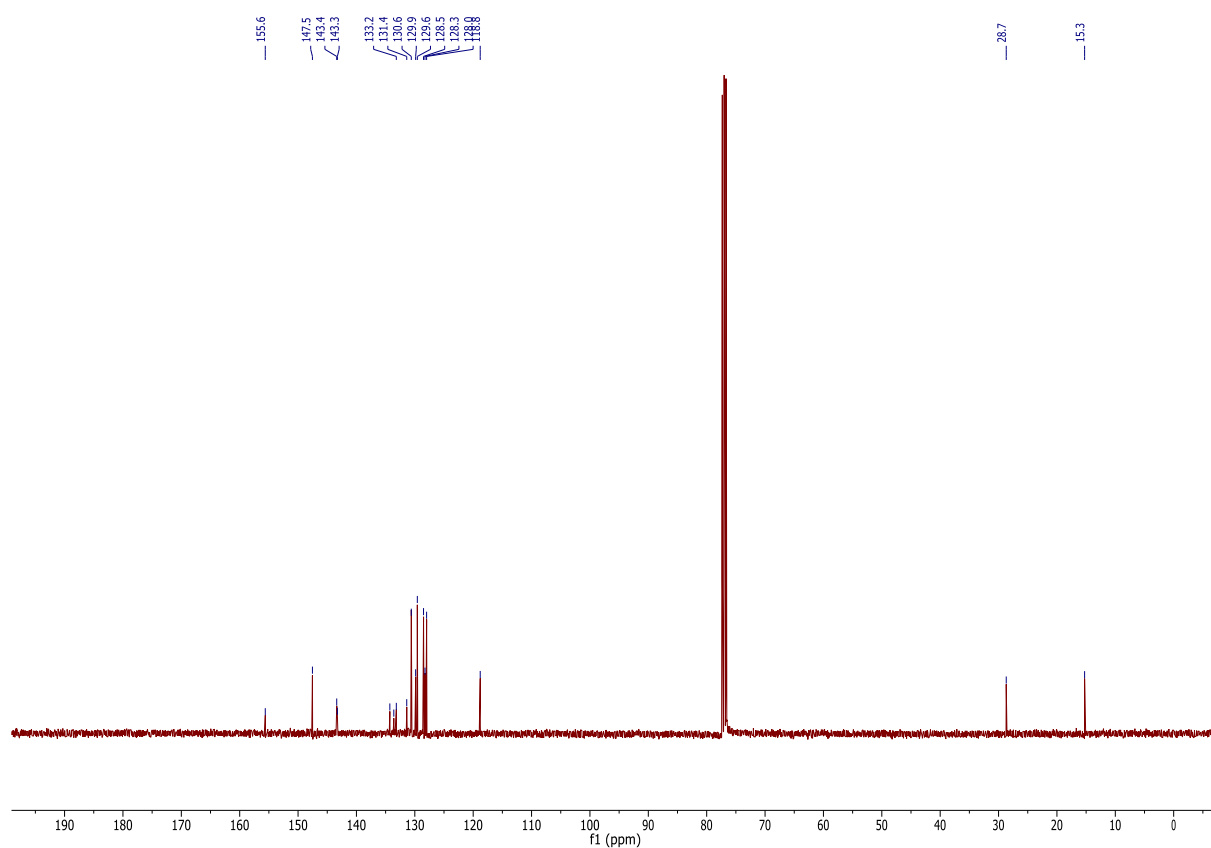

419

420

**4-(2-phenylthieno[3,2-b]pyridin-3-yl)benzonitrile (29)**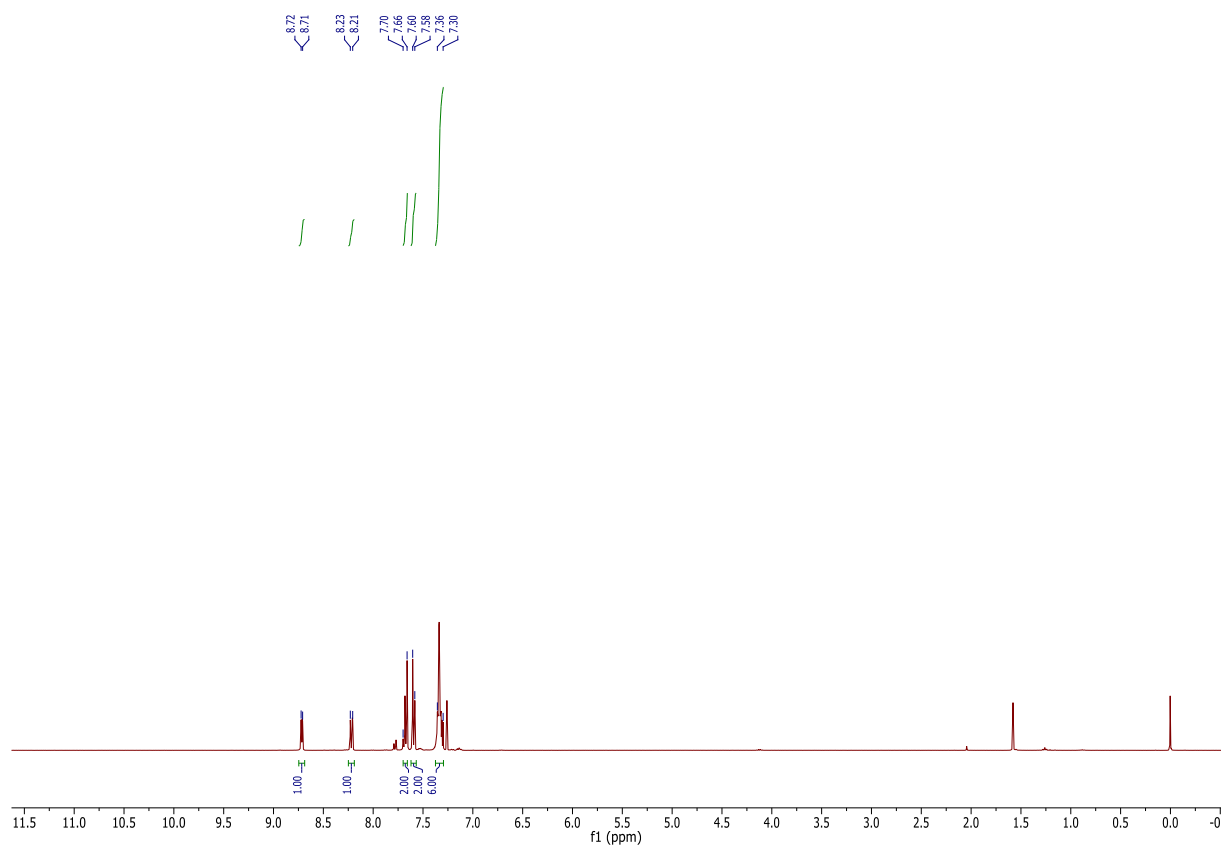

421

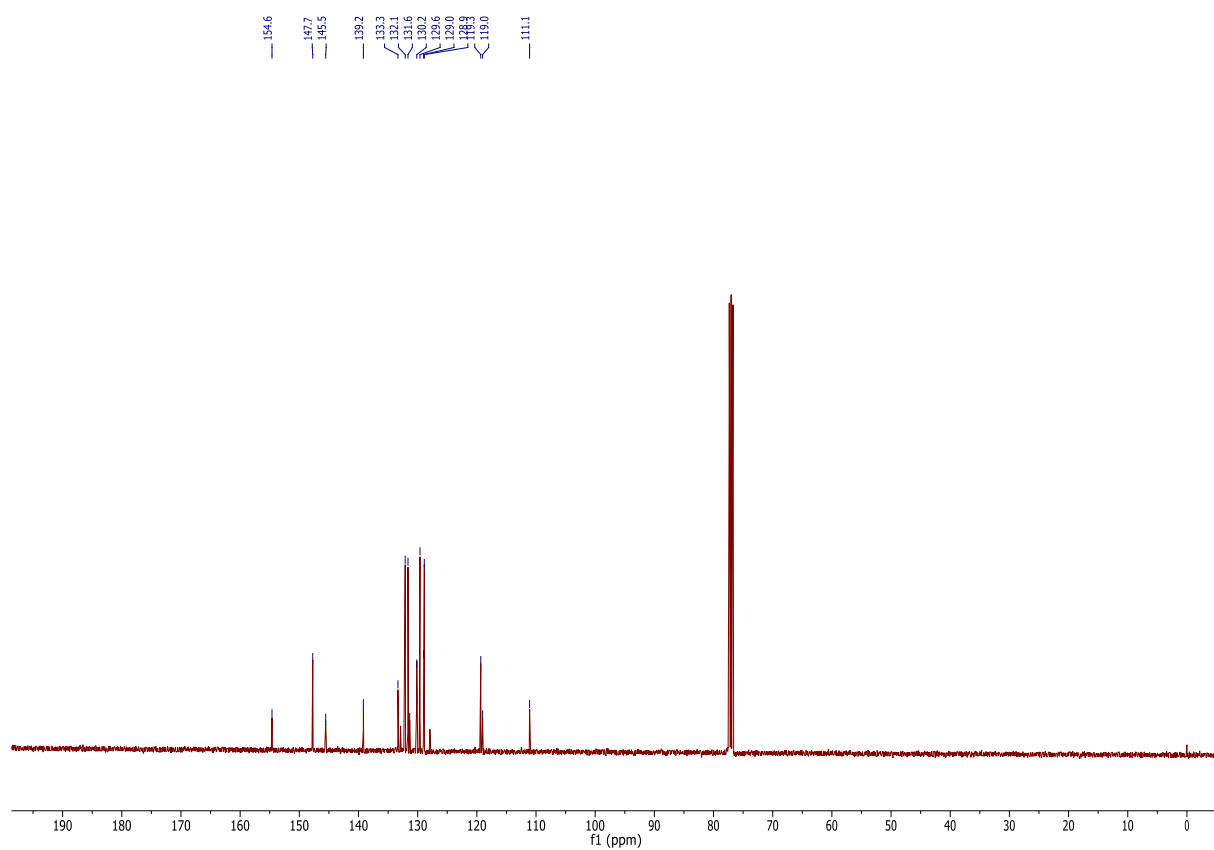

422

423

## 6,7-diphenylthieno[2,3-b]pyrazine (30)

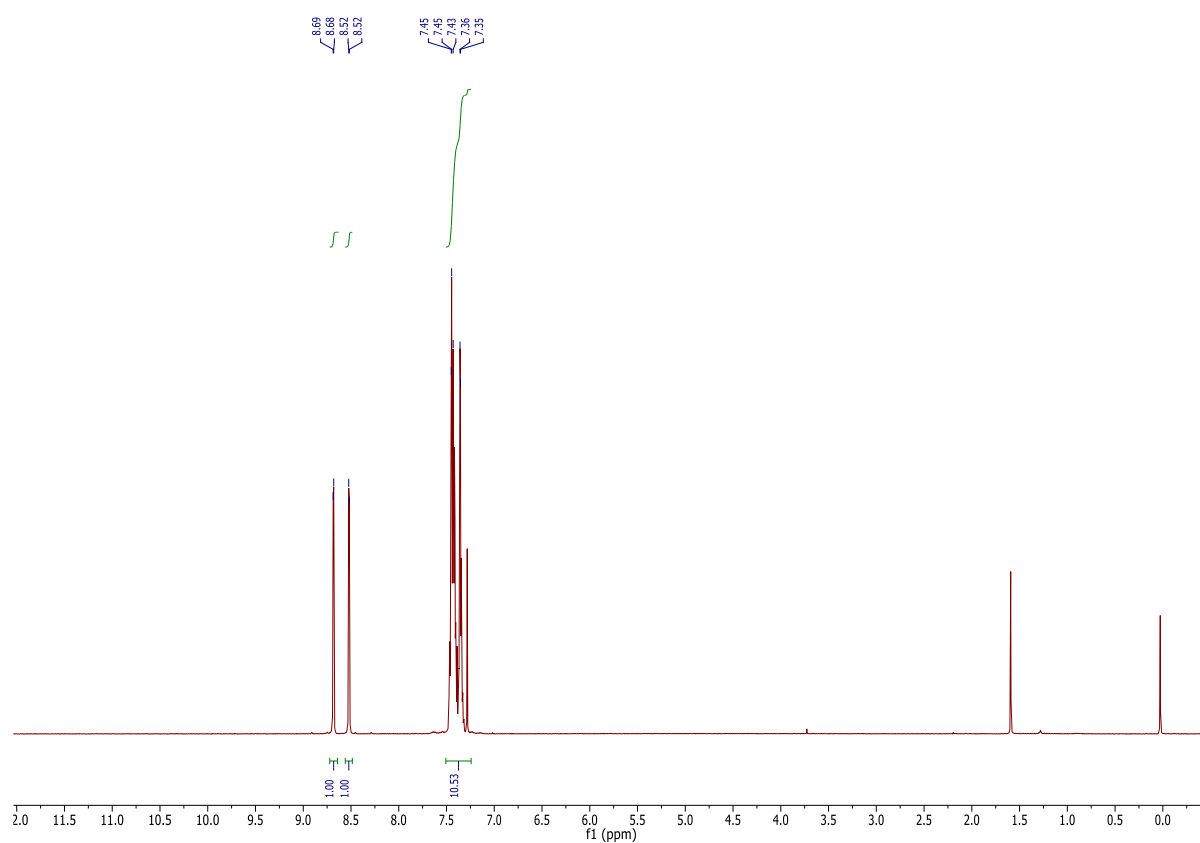

424

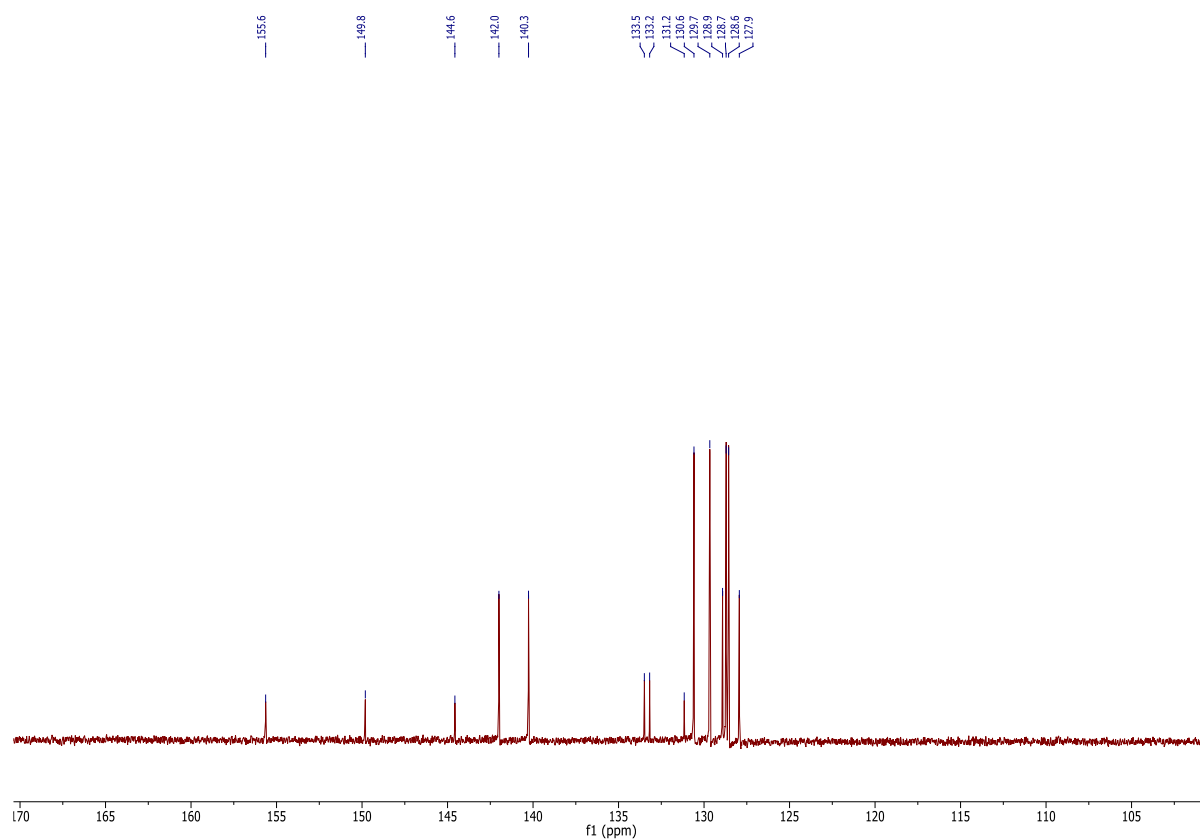

425

426

427

## 6-phenyl-7-(p-tolyl)thieno[2,3-b]pyrazine (31)

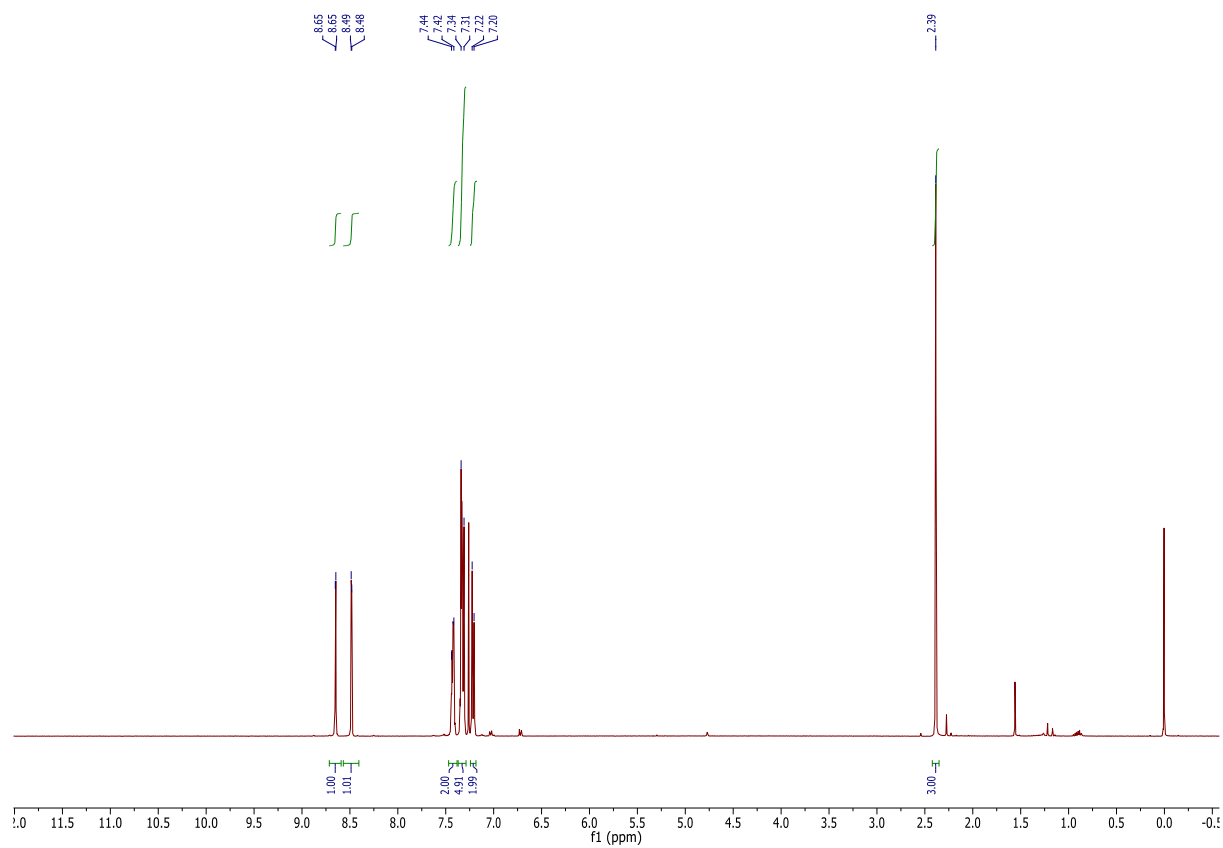

428

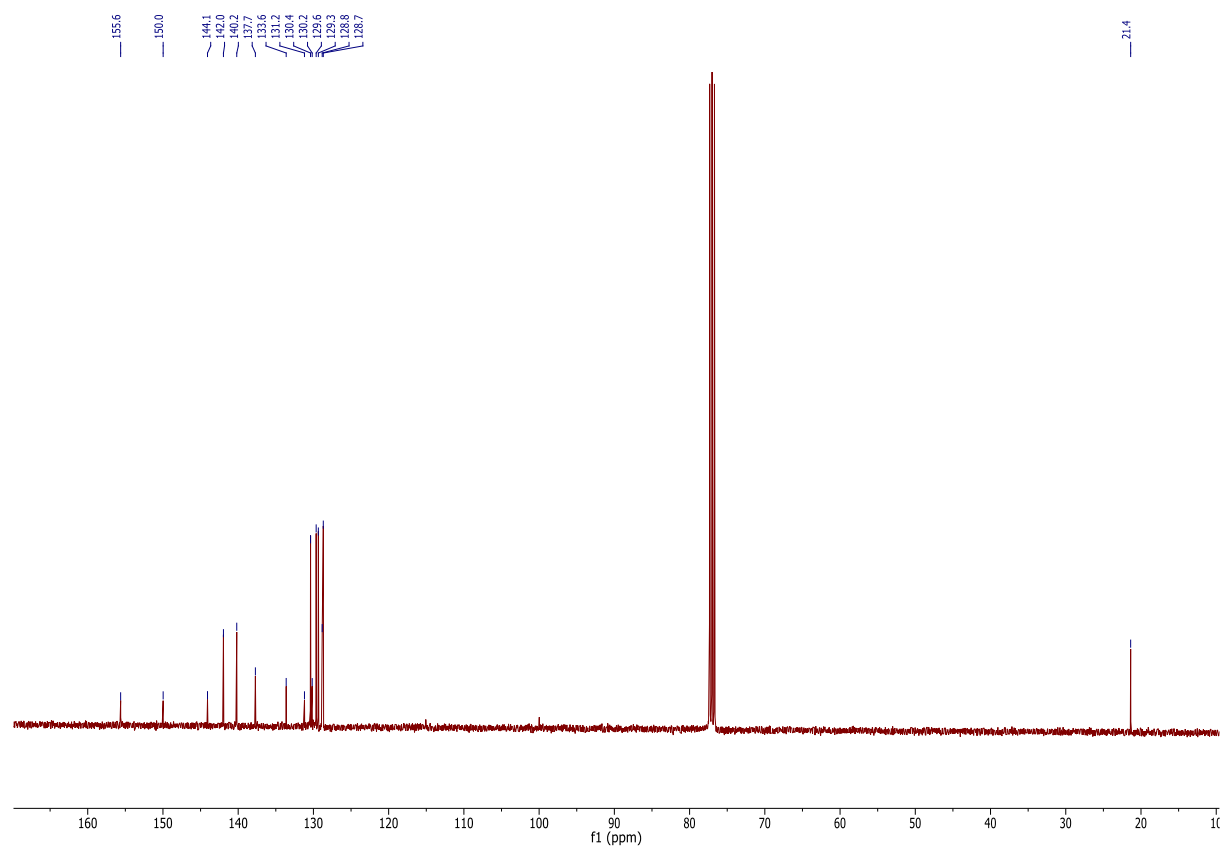

429

430

## 4-(6-phenylthieno[2,3-b]pyrazin-7-yl)benzonitrile (32)

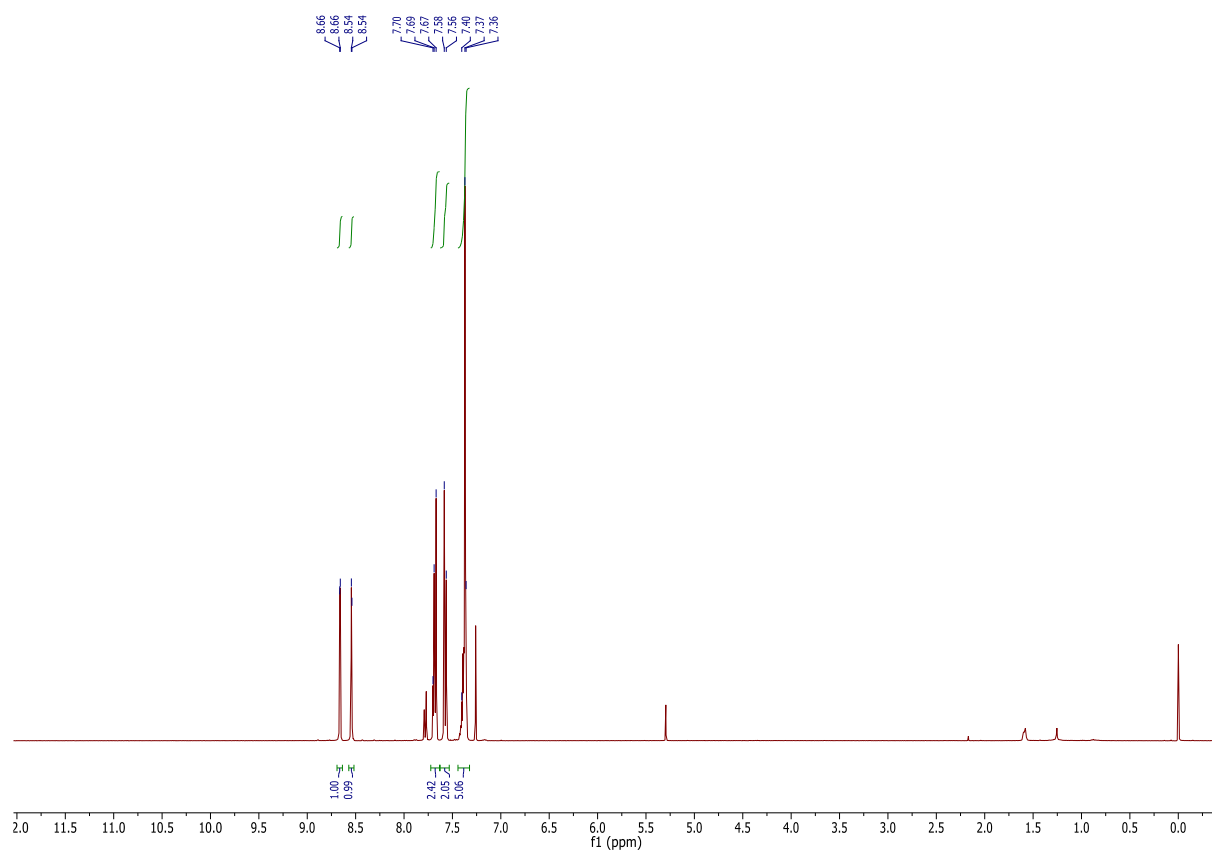

431

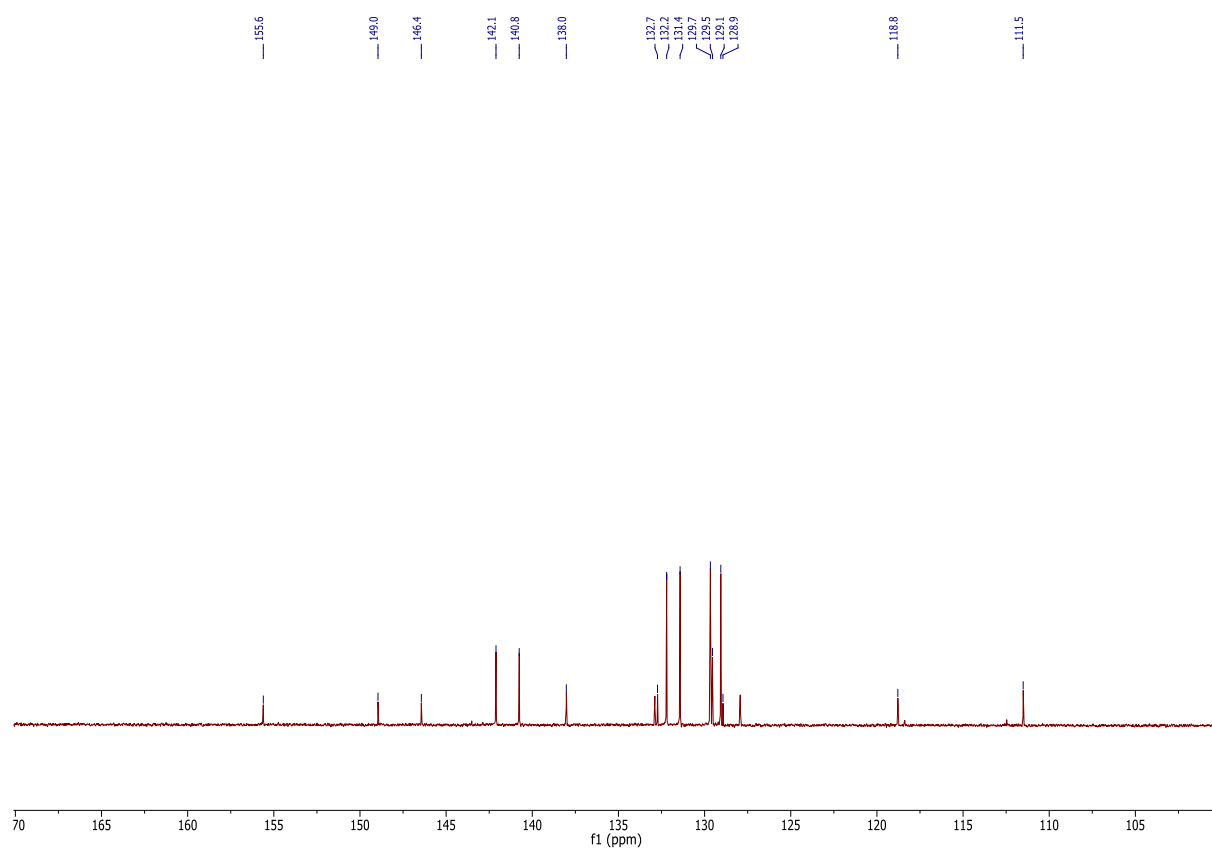

432

## 433 1.4. References

- 434 30. Barelier, S.; Eidam, O.; Fish, I.; Hollander, J.; Figaroa, F.; Nachane, R.; Irwin, J.J.; Shoichet, B.K.; Siegal,  
435 G. Increasing Chemical Space Coverage by Combining Empirical and Computational Fragment  
436 Screens ACS Chem. Biol. **2014**, 9, 7, 1528-1535, doi:10.1021/cb5001636.
- 437 31. Kemnitzer, W.; Sirisoma, N.; May, C.; Tseng, B.; Drewe, J.; Cai, S.X. Discovery of 4-anilino-N-  
438 methylthieno[3,2-d]pyrimidines and 4-anilino-N-methylthieno[2,3-d]pyrimidines as potent  
439 apoptosis inducers *Bioorganic Med. Chem. Lett* **2009**, 19, 13, 3536-3540, doi:10.1016/j.bmcl.2009.04.145.
- 440
- 441

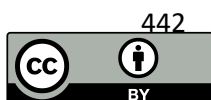

© 2018 by the authors. Submitted for possible open access publication under the terms and conditions of the Creative Commons Attribution (CC BY) license (<http://creativecommons.org/licenses/by/4.0/>).
